# Supplementary material for: Multimorbidity in a marginalised, street-health Australian population: a retrospective cohort study
Source: PubMed Central journal article supplement — BMJ Open. 2014 Aug 19;4(8):e005461. doi: 10.1136/bmjopen-2014-005461 (PMC4139644; doi:10.1136/bmjopen-2014-005461), 2014-08-19
Supplement: bmjopen-2014-005461.draft_revisions.pdf [file bmjopen-2014-005461.draft_revisions.pdf]

# BMJ Open

## Multimorbidity in a marginalised, street-health Australian population: A retrospective cohort study

|                                 |                                                                                                                                                                                                                                                                                                                                                                                                                                                                                                                                                                                                                                                                                                                                     |
|---------------------------------|-------------------------------------------------------------------------------------------------------------------------------------------------------------------------------------------------------------------------------------------------------------------------------------------------------------------------------------------------------------------------------------------------------------------------------------------------------------------------------------------------------------------------------------------------------------------------------------------------------------------------------------------------------------------------------------------------------------------------------------|
| Journal:                        | <i>BMJ Open</i>                                                                                                                                                                                                                                                                                                                                                                                                                                                                                                                                                                                                                                                                                                                     |
| Manuscript ID:                  | bmjopen-2014-005461                                                                                                                                                                                                                                                                                                                                                                                                                                                                                                                                                                                                                                                                                                                 |
| Article Type:                   | Research                                                                                                                                                                                                                                                                                                                                                                                                                                                                                                                                                                                                                                                                                                                            |
| Date Submitted by the Author:   | 14-Apr-2014                                                                                                                                                                                                                                                                                                                                                                                                                                                                                                                                                                                                                                                                                                                         |
| Complete List of Authors:       | Brett, Tom; University of Notre Dame Australia, General Practice and Primary Health Care Research Unit, School of Medicine<br>Arnold-Reed, Diane; University of Notre Dame Australia, General Practice and Primary Health Care Research Unit, School of Medicine; University of Western Australia, School of Population Health<br>Troeng, Lakkhina; University of Notre Dame Australia, General Practice and Primary Health Care Research Unit, School of Medicine<br>Bulsara, Max; University of Notre Dame, Biostatistics<br>Williams, Annalisse; Illawarra Shoalhaven Local Health District,<br>Moorhead, Robert; University of Notre Dame Australia, General Practice and Primary Health Care Research Unit, School of Medicine |
| <b>Primary Subject Heading</b>: | General practice / Family practice                                                                                                                                                                                                                                                                                                                                                                                                                                                                                                                                                                                                                                                                                                  |
| Secondary Subject Heading:      | General practice / Family practice                                                                                                                                                                                                                                                                                                                                                                                                                                                                                                                                                                                                                                                                                                  |
| Keywords:                       | PRIMARY CARE, multimorbidity, chronic disease                                                                                                                                                                                                                                                                                                                                                                                                                                                                                                                                                                                                                                                                                       |
|                                 |                                                                                                                                                                                                                                                                                                                                                                                                                                                                                                                                                                                                                                                                                                                                     |

SCHOLARONE™  
Manuscripts

Only

**TITLE:** Multimorbidity in a marginalised, street-health Australian population – a retrospective cohort study

**CORRESPONDING AUTHOR:**

Prof Tom Brett  
Director  
General Practice and Primary Health Care Research  
School of Medicine  
The University of Notre Dame Australia  
19 Mouat Street, PO Box 1225  
Fremantle, Western Australia 6959

Tel: +61 8 9433 0571

Email: [tom.brett@nd.edu.au](mailto:tom.brett@nd.edu.au)

**CO-AUTHORS:**

1. Associate Professor Diane E Arnold-Reed  
Research and Development Co-ordinator  
General Practice and Primary Health Care Research  
School of Medicine  
The University of Notre Dame Australia  
19 Mouat Street, PO Box 1225  
Fremantle, Western Australia 6959
2. Dr Lakkhina Troeung  
Statistical Support Officer  
General Practice and Primary Health Care Research  
School of Medicine  
The University of Notre Dame Australia  
19 Mouat Street, PO Box 1225  
Fremantle, Western Australia 6959
3. Professor Max K Bulsara  
Chair in Biostatistics  
Institute for Health Research  
The University of Notre Dame Australia  
19 Mouat Street, PO Box 1225  
Fremantle, Western Australia 6959
4. Dr Annalisse Williams  
Junior Medical Officer and GP Registrar  
Illawarra Shoalhaven Local Health District  
New South Wales, Australia
5. Professor Robert G Moorhead  
Adjunct Professor  
School of Medicine  
The University of Notre Dame Australia  
19 Mouat Street, PO Box 1225  
Fremantle, Western Australia 6959

**Word count** (excluding title page, abstract, references, figures and tables): **3,484**

## ABSTRACT

**Objectives:** To examine the demographic and presentation profile of patients using an innovative mobile outreach clinic and compare this service with patients attending mainstream practice.

**Design:** Retrospective cohort study.

**Setting:** Two primary care clinics in Western Australia: mobile street health clinic and mainstream practice.

**Participants:** 2587 street health patients and 4583 mainstream patients.

**Main outcome measures:** Prevalence and patterns of chronic diseases in anatomical domains across entire age spectrum of patients and disease severity burden using Cumulative Illness Rating Scale (CIRS).

**Results:** Multimorbidity (2+ CIRS domains) was lower in the street health (46.4%, 1199/2587) than mainstream sample (50.1%, 2294/4583),  $p=0.003$  but street health patients showed significantly greater disease severity. Controlling for age and gender, mean CIRS Severity Index score for street health ( $M = 1.4$ ,  $SD = 0.91$ ) was significantly higher than mainstream patients ( $M = 1.1$ ,  $SD = 0.80$ ),  $p<0.001$ . Furthermore, 44.2% (530/1199) of street health patients had at least one level 3 or 4 score across domains compared to 18.3% (420/2294) of mainstream patients,  $p<0.001$ .

Younger street health patients (14-43 years) showed greater multimorbidity than mainstream patients. Prevalence is significantly lower in street health (62.3%, 584/938) if aged 45+ years compared to mainstream patients (78.7%, 1277/1622),  $p<0.001$ .

Aboriginal patients were 29.6% (766/2587) of street health population with 50.4% (386/766) having multimorbidity compared with 44.6% (813/1821) for non-Aboriginals,  $p=0.007$ . Musculoskeletal, respiratory and psychiatric domains were most commonly affected with multimorbidity significantly associated with male gender, increasing age and Indigenous status.

**Conclusions:** Multimorbidity prevalence is lower in street health cohort but with greater severity. Early onset (23-34 years old) multimorbidity is higher in street health cohort but prevalence is lower in 45+ years than mainstream patients. Multimorbidity prevalence is higher for Aboriginal patients of all ages.

**ARTICLE SUMMARY****Strengths and limitations of the study**

- New information on a vulnerable, street-based population accessing an accredited, mobile outreach medical service.
- The large cohort size (n=2587) involving a total street based population seen over a six year period compared with 4583 mainstream patients from similar catchment area.
- Includes a severity rating for each patient in addition to prevalence and patterns of chronic diseases recorded.
- The open access policy to the street health service could have diluted the proportion of more traditional users of the service because of one-off opportunistic and convenience attendances.
- The street health population is based on data collected over a six year period while the comparator mainstream practice data was collected over six months.

**KEY WORDS**

Multimorbidity, chronic disease, primary healthcare, general practice, severity of illness index

## INTRODUCTION

The combination of multiple chronic diseases (multimorbidity) and poor access to primary health care results in serious social, economic and health consequences[1-5] as well as providing considerable challenges for service providers. Marginalised and homeless people have more chronic diseases, high mortality rates, high direct and indirect healthcare costs[6,7] and poor utilisation of primary care health services.[1,8-11] Alcohol and drug related deaths, smoking related diseases, ischemic heart disease and respiratory diseases are especially common.[9] A systematic review[12] found homeless people in Western countries had much greater drug and alcohol dependence compared to age-matched populations while psychotic illnesses and personality disorders were also more common. Canadian homeless and marginally housed people have 32% probability of survival to 75 years among men and 60% among women with housing a key marker for socioeconomic disadvantage.[9] Death rates among 'rough sleepers' in the United Kingdom are 25 times that of the housed population.[13]

Risk factors influencing access to health services include lack of suitable housing,[9,14] mental health problems,[12,15] poor education, unemployment and lack of regular income.[16,17] Social marginalisation impacts negatively on healthcare utilisation including fear of stigmatisation on visiting mainstream practices and waiting rooms.[18] People from Indigenous, non-English speaking and refugee backgrounds often avoid contact with a regular doctor and only seek help when a crisis develops.[19-21] Such individuals have poorer health outcomes[22] exhibiting patterns of chronic, multimorbid disease at a younger age compared to the general population.[23] In Scotland, Mercer[3] found an increased burden of ill-health and multimorbidity in deprived areas resulting in greater demands on primary health care leading to reduced access, less patient-doctor time and more GP stress but less patient enablement.

The "Freo Street Doctor", an accredited, street-based mobile health clinic established in 2005 to help meet the needs of marginalised and homeless patients unable or unwilling to access mainstream primary health care, operates in a number of designated areas within Fremantle and surrounding suburbs in Western Australia. The clinic team consists of general practitioners, nurses, outreach workers, Indigenous health workers and social workers. Our study aims to examine the demographic profile of patients using this street health service compared to mainstream primary care practices, the range and severity of morbidities/chronic diseases across anatomical domains and compares these parameters for Aboriginal and non-Aboriginal patients.

## METHOD

### Study Setting

The entire patient cohort attending the “Freo Street Doctor” service over the period 1 January 2006 to 31 December 2011 was examined using data extracted from electronic medical records stored at the Fremantle Medicare Local. Data from the street health patient cohort were compared with a subset of patient data from a mainstream general practice clinic[24] servicing the same catchment area over the period 1 July to 31 December 2008.

### Data Extraction

Data extraction was undertaken by two GPs and two medical students, all with similar training and prior experience in the use and application of the Cumulative Illness Rating Scale (CIRS). The scoring of chronic conditions using the validated CIRS has been described in detail previously[20,25] as has the Severity Index (SI) classification.[24]

The street health dataset contained a large number of one-off consultations. Some attendees had no fixed abode with many using drop-in centres as proxy addresses. Because the study population was considered at higher risk than same age patients attending mainstream practices and clinical information was limited in some instances, we included patients with conditions that appeared to be ongoing (for example, skin infections post lacerations or scabies infestation). We did so to reflect the types of problems presenting to the Street health service and the fact that such conditions were often of much greater magnitude in disadvantaged, marginalised populations such as the homeless and drug users.

### Operational Definition

Our operational definition of multimorbidity was the co-occurrence of conditions across two or more (2+) domains in individual patients.[26] After data extraction was completed, a random sample of 30 patients across the entire age spectrum for both clinics was re-assessed to measure consistency among raters.

### Data Analysis

Data analysis was conducted using SPSS 22 (IBM Corporation). All statistical analyses were tested against an alpha level of 0.05 (two-tailed).

Sample characteristics are expressed as means (standard deviation of the mean) for continuous variables and as frequencies (percentages) for categorical variables. Independent samples t-tests and Chi-Square tests were used to examine any demographic differences between the two samples.

The prevalence of multimorbidity was calculated as the number of patients with long-term conditions in 2+ morbidity domains as a proportion of the total sample. Chi-square tests were used to examine prevalence differences between the two cohorts. Patterns of multimorbidity are expressed as frequencies.

1  
2  
3 To examine age of onset of multimorbidity, we modelled the probability of multimorbidity as a  
4 function of age. First, a logistic regression analysis was run with the presence of multimorbidity as  
5 the dependent variable, and clinic, age, and age squared (given the non-linear relationship between  
6 age and multimorbidity) as independent variables (IV). The regression coefficients ( $\beta$ ) for each IV  
7 were then used to model the probability of multimorbidity as a function of age in each sample.  
8  
9

10 Multimorbidity severity was examined using the CIRS SI score as well as distribution of patients  
11 within each CIRS severity category. SI categories were defined as 0 (none), 1 (mild), 2 (moderate)  
12 and 3 or 4 (severe). General linear modelling (GLM) was used to examine differences in  
13 multimorbidity severity between the two samples, controlling for age and gender. We also counted  
14 and compared the number of patients with at least one level 3 or 4 score across CIRS domains,<sup>[20]</sup>  
15 as well as the number of domains with a level 3 or 4 score for each patient as additional indicators of  
16 disease severity.  
17  
18  
19

20 Subgroup analysis was conducted to examine the prevalence and severity of multimorbidity in  
21 Indigenous and non-Indigenous patients in the street health cohort. There was no data on  
22 Indigenous status in the mainstream cohort for comparison.  
23  
24

25 We also examined the relationship between demographic characteristics and the presence of  
26 multimorbidity across 2, 3, and 5 domains using a series of logistic regression analyses.  
27  
28

29 Inter-rater reliability between data extractors was assessed using Cronbach's alpha.  
30  
31

### 32 **Ethics**

33 Ethics approval for the study was obtained from The University of Notre Dame Australia Human  
34 Research Ethics Committee.  
35  
36  
37  
38  
39  
40  
41  
42  
43  
44  
45  
46  
47  
48  
49  
50  
51  
52  
53  
54  
55  
56  
57  
58  
59  
60

## RESULTS

**Patient Characteristics**

A total of 2587 patients attended the street health service and 4583 attended mainstream practice over the study periods. The age and gender distribution of patients at both clinics are shown in Table 1. The mean age of street health patients was 37.8 years (SD = 18.7) compared with 36.2 (SD = 21.1) for the mainstream practice. There were no significant differences in age between the two cohorts,  $p=0.055$ , but a significant difference in gender distribution was observed. The majority of the street health patients were male (57.3%, 1482/2587) while the majority of patients attending mainstream practice were female (60.7%, 2783/4583),  $p<0.001$ .

**Table 1. Age and Gender Distribution for Study Population**

|                              | Fremantle Street Doctor       |                                 |                                      | Mainstream practice<br>( <i>n</i> = 4583) |
|------------------------------|-------------------------------|---------------------------------|--------------------------------------|-------------------------------------------|
|                              | Overall<br>( <i>n</i> = 2587) | Aboriginal<br>( <i>n</i> = 766) | Non-Aboriginal<br>( <i>n</i> = 1821) |                                           |
| Sex, % ( <i>n</i> )          |                               |                                 |                                      |                                           |
| Male                         | 57.3 (1482)                   | 50.3 (385)                      | 60.2 (1097)                          | 39.3 (1800)                               |
| Female                       | 42.7 (1105)                   | 49.7 (381)                      | 39.8 (724)                           | 60.7 (2783)                               |
| Age, mean (SD) [range]       |                               |                                 |                                      |                                           |
| Overall                      | 37.8 (18.7)<br>[0 to 103]     | 32.09 (17.9)<br>[0 to 81]       | 40.19 (18.5)<br>[0 to 103]           | 36.18 (21.1)<br>[0 to 98]                 |
| Male                         | 39.1 (18.5)<br>[0 to 103]     | 31.8 (18.1)<br>[1 to 81]        | 41.6 (17.9)<br>[0 to 103]            | 35.1 (22.3)<br>[0 to 92]                  |
| Female                       | 36.1 (18.7)<br>[0 to 90]      | 32.3 (17.7)<br>[0 to 75]        | 38.0 (18.9)<br>[0 to 90]             | 36.9 (20.3)<br>[0 to 98]                  |
| Age Category, % ( <i>n</i> ) |                               |                                 |                                      |                                           |
| < 25                         | 24.2 (626)                    | 36.8 (282)                      | 18.9 (344)                           | 28.9 (1326)                               |
| 25 to 44                     | 39.5 (1023)                   | 35.8 (274)                      | 41.1 (749)                           | 35.7 (1635)                               |
| 45 to 64                     | 28.3 (732)                    | 24.4 (187)                      | 29.9 (545)                           | 27.1 (1243)                               |
| 65 to 74                     | 5.3 (136)                     | 2.3 (18)                        | 6.5 (118)                            | 4.6 (211)                                 |
| 75+                          | 2.7 (70)                      | 0.7 (5)                         | 3.6 (65)                             | 3.7 (168)                                 |

Aboriginal patients were 29.6% (766/2587) of the street health sample. On average, Aboriginal patients were significantly younger than non-Aboriginal patients, with 36.8% (282/766) under the age of 25 compared with only 18.9% (344/1821) of non-Aboriginals,  $p<0.001$ . The majority of non-Aboriginal patients were male (60.2%, 1097/1821) while there was a more even gender distribution for Aboriginal patients attending the street health service (male 50.3%, 385/766),  $p<0.001$ .

**Inter-rater Reliability**

Inter-rater reliability between data extractors was tested on CIRS scores and number of domains with morbidities for 30 randomly selected patients from each of the two cohorts. For the street health cohort, the intraclass correlation coefficient (ICC) was 0.94 (95% confidence interval 0.89 to 0.97) for number of domains with morbidities and 0.96 (95% CI 0.93 to 0.98) for total CIRS scores



1  
2  
3 indicating high inter-rater reliability. For the mainstream practice sample, the ICC was 0.98 (95% CI  
4 0.97 to 0.99) for number of domains with morbidities and 0.98 (95% CI 0.97 to 0.99) for CIRS scores.  
5  
6

### 7 **Prevalence of Multimorbidity**

8 Overall, the prevalence of multimorbidity was lower in the street health sample. Multimorbidity,  
9 based on the presence of conditions affecting 2+ domains, was present in 46.3% (1199/2587, 95%  
10 confidence interval 44.4 to 48.3%) of street health patients, compared with 50.1% (2294/4583, 95%  
11 CI 48.6 to 51.5%) of the mainstream sample,  $p=0.003$ . A total of 28.0% (724/2587) of the street  
12 health cohort had multimorbidity in 3+ domains compared with 31.9% (1464/4583) of mainstream  
13 patients,  $p<0.001$ . Across 5+ domains, 10% (259/2587) of street health patients showed  
14 multimorbidity compared with 12.8% (587/4583) of the mainstream sample,  $p<0.001$ .  
15  
16

17  
18 Figure 1 shows the prevalence of multimorbidity across 2+ domains for both samples across age  
19 groups. The prevalence of multimorbidity among young street health patients aged < 45 years  
20 (37.7%, 615/1649) was significantly higher than in the mainstream sample (34.3%, 1017/2961),  
21  $p=0.045$ . However, multimorbidity prevalence was significantly lower in the street health sample for  
22 patients 45+ years (62.3% [584/938] vs 78.7% [1277/1622], respectively),  $p<0.001$ .  
23  
24

25 Age of onset of multimorbidity was different for the two populations (Figure 2). For street health  
26 patients, the probability of multimorbidity peaked between 61 and 67 years,  $P(E_{\text{STREET HEALTH}})=0.78$ ,  
27 and then decreased. For mainstream patients, the probability of multimorbidity increased with age,  
28 with the greatest probability of multimorbidity observed for individuals aged over 70 years,  $P$   
29  $(E_{\text{MAINSTREAM}})=0.99$ . Between the ages of 14 and 43, the probability of multimorbidity was higher for  
30 street health patients,  $P(E_{\text{STREET HEALTH}})=0.26$  to  $0.71$  vs.  $P(E_{\text{MAINSTREAM}})=0.24$  to  $0.69$ , suggesting that  
31 younger street health patients are particularly vulnerable to multimorbidity. The greatest difference  
32 was observed between the ages of 23 and 34,  $P(E_{\text{STREET HEALTH}})=0.43$  to  $0.62$  vs.  $P(E_{\text{MAINSTREAM}})=0.33$   
33 to  $0.52$ , with street health patients showing a mean 12% greater chance of multimorbidity than  
34 mainstream patients in this age group.  
35  
36  
37  
38

39 Overall for the street health Aboriginal patients, multimorbidity (2+ domains) was present in 50.4%  
40 (386/765, 95% confidence interval 46.9 to 53.9%) compared with 44.6% (813/1821, 95% CI 42.4 to  
41 46.9%) in non-Aboriginals,  $p=0.007$ . A total of 33.2% of Aboriginal patients (254/766) had 3+  
42 domains affected compared with 25.8% (470/1821) in non-Aboriginals,  $p<0.001$ , while 13.7%  
43 (105/765) had 5+ domains affected compared with 8.5% (154/1821) in non-Aboriginals,  $p<0.001$ .  
44 Stratified by age, the prevalence of multimorbidity (2+) across all age groups was significantly higher  
45 among Aboriginal compared with non-Aboriginal patients,  $p<0.001$  (Figure 3).  
46  
47  
48

### 49 **Patterns of Multimorbidity**

50 Table 2 displays the prevalence of the five most common body system domain combinations across  
51 single, 1+, 2+, 3+ and 5+ domains for the street health sample with corresponding prevalence rates  
52 in mainstream practice for comparison. Table 2 also displays the prevalence of the five most  
53 common domain combinations stratified by age.  
54  
55

56 Table 3 displays the prevalence of the five most common domain combinations across single, 1+, 2+,  
57 3+ and 5+ domains stratified by Indigenous status and age.  
58  
59  
60

Table 2. Overall and age category breakdown for the 5 most common domains for Street Health cohort

|                                       | Domains                                               | Street Health<br>% (n) | Mainstream<br>practice<br>% (n) <sup>a-d</sup> | Age category (Street health cohort only) |            |            |           |           |
|---------------------------------------|-------------------------------------------------------|------------------------|------------------------------------------------|------------------------------------------|------------|------------|-----------|-----------|
|                                       |                                                       |                        |                                                | < 25                                     | 25 to 44   | 45 to 64   | 65 to 74  | 75+       |
| One domain<br>only<br>(n = 798)       | Musculoskeletal                                       | 29.8 (238)**           | 21.8 (231)                                     | 24.2 (58)                                | 49.2 (117) | 19.7 (47)  | 5.9 (14)  | 0.8 (2)   |
|                                       | Psychiatric                                           | 20.3 (162)             | 18.7 (198)                                     | 20.4 (33)                                | 53.7 (87)  | 24.1 (39)  | 1.9 (3)   | 0         |
|                                       | Eye, ear, nose and throat                             | 13.7 (109)*            | 9.7 (103)                                      | 62.4 (68)                                | 18.3 (20)  | 14.7 (16)  | 0.9 (1)   | 3.7 (4)   |
|                                       | Respiratory                                           | 9.4 (75)               | 17.8 (188)                                     | 38.7 (29)                                | 29.3 (22)  | 30.7 (23)  | 1.3 (1)   | 0         |
|                                       | Genitourinary                                         | 6.9 (55)               | 8.5 (90)                                       | 14.5 (8)                                 | 69.1 (38)  | 14.5 (8)   | 1.8 (1)   | 0         |
| One or more<br>domains<br>(n = 1997)  | Psychiatric                                           | 46.7 (933)**           | 34.6 (1161)                                    | 8.6 (80)                                 | 48.9 (456) | 36.5 (341) | 4.7 (44)  | 1.3 (12)  |
|                                       | Musculoskeletal                                       | 42.9 (856)             | 45.2 (1514)                                    | 13.1 (112)                               | 44.6 (382) | 31.8 (272) | 7.1 (61)  | 3.4 (29)  |
|                                       | Respiratory                                           | 35.0 (699)             | 35.6 (1193)                                    | 11.7 (82)                                | 43.2 (302) | 38.6 (270) | 4.9 (34)  | 1.6 (11)  |
|                                       | Eye, ear, nose and throat                             | 19.1 (381)*            | 22.7 (762)                                     | 29.4 (112)                               | 29.7 (113) | 29.7 (113) | 6.3 (24)  | 5.0 (19)  |
|                                       | Vascular                                              | 18.2 (364)**           | 22.3 (746)                                     | 3.3 (12)                                 | 17.6 (64)  | 53.8 (196) | 13.5 (49) | 11.8 (43) |
| Two or more<br>domains<br>(n = 1199)  | Psychiatric + Respiratory                             | 37.1 (445)**           | 18.8 (432)                                     | 7.2 (32)                                 | 48.3 (215) | 39.1 (174) | 4.3 (19)  | 1.1 (5)   |
|                                       | Psychiatric + Musculoskeletal                         | 32.4 (388)**           | 22.2 (510)                                     | 3.6 (14)                                 | 47.2 (183) | 41.8 (162) | 5.7 (22)  | 1.8 (7)   |
|                                       | Respiratory + Musculoskeletal                         | 25.6 (307)*            | 22.4 (515)                                     | 5.9 (18)                                 | 42.3 (130) | 43.3 (133) | 6.8 (21)  | 1.6 (5)   |
|                                       | Vascular + Musculoskeletal                            | 14.6 (175)**           | 19.4 (445)                                     | 2.3 (4)                                  | 17.7 (31)  | 50.9 (89)  | 15.4 (27) | 13.7 (24) |
|                                       | Hepatic-Pancreatic + Psychiatric                      | 14.3 (172)**           | 2.8 (64)                                       | 1.7 (3)                                  | 45.9 (79)  | 45.9 (79)  | 5.3 (9)   | 1.2 (2)   |
| Three or more<br>domains<br>(n = 724) | Psychiatric + Respiratory + Musculoskeletal           | 30.9 (224)**           | 14.7 (215)                                     | 3.6 (8)                                  | 42.4 (95)  | 47.3 (106) | 5.8 (13)  | 0.9 (2)   |
|                                       | Psychiatric + Haematological + Endocrine              | 14.5 (105)             | 14.1 (206)                                     | 3.8 (4)                                  | 37.1 (39)  | 46.7 (49)  | 8.6 (9)   | 3.8 (4)   |
|                                       | Psychiatric + Respiratory + Vascular                  | 14.4 (104)**           | 8.5 (125)                                      | 2.9 (3)                                  | 25.0 (26)  | 60.6 (63)  | 8.7 (9)   | 2.9 (3)   |
|                                       | Psychiatric + Musculoskeletal + Vascular              | 14.2 (103)             | 13.1 (192)                                     | 1.0 (1)                                  | 18.4 (19)  | 60.2 (62)  | 14.6 (15) | 5.8 (6)   |
|                                       | Psychiatric + Respiratory + Lower<br>Gastrointestinal | 13.8 (100)**           | 5.9 (87)                                       | 1.0 (1)                                  | 46.0 (46)  | 50.0 (50)  | 1.0 (1)   | 2.0 (2)   |

<sup>a</sup> For 1 domain only, denominator (n = 1058), <sup>b</sup> For 1+ domains, denominator (n = 3352), <sup>c</sup> For 2+ domains, denominator (n = 2294), <sup>d</sup> For 3+ domains, denominator (n = 1772)

\* Chi square test significant at .05 level vs mainstream practice

\*\* Chi square test significant at .001 level vs mainstream practice

Table 3. Overall and age category breakdown for the 5 most common domains for Aboriginal Street Health patients

|                                    | Domains                                     | Aboriginal<br>% (n) | Non-Aboriginal<br>% (n) <sup>a-d</sup> | Age category (Aboriginal patients only) |            |            |          |         |
|------------------------------------|---------------------------------------------|---------------------|----------------------------------------|-----------------------------------------|------------|------------|----------|---------|
|                                    |                                             |                     |                                        | < 25                                    | 25 to 44   | 45 to 64   | 65 to 74 | 75+     |
| One domain only<br>(n = 216)       | Musculoskeletal                             | 34.3 (74)           | 28.2 (164)                             | 55.4 (41)                               | 36.5 (27)  | 8.1 (6)    | 0        | 0       |
|                                    | Eye, ear, nose and throat                   | 19.0 (41)*          | 11.7 (68)                              | 85.4 (35)                               | 12.2 (5)   | 2.4 (1)    | 0        | 0       |
|                                    | Psychiatric                                 | 13.0 (28)*          | 23.0 (134)                             | 25.0 (7)                                | 57.1 (16)  | 17.9 (5)   | 0        | 0       |
|                                    | Respiratory                                 | 8.3 (18)            | 9.8 (57)                               | 55.6 (10)                               | 22.2 (4)   | 22.2 (4)   | 0        | 0       |
|                                    | Lower gastrointestinal                      | 6.0 (13)            | 5.0 (29)                               | 30.8 (4)                                | 53.8 (7)   | 15.4 (2)   | 0        | 0       |
| One or more domains<br>(n = 602)   | Musculoskeletal                             | 47.5 (286)*         | 40.9 (570)                             | 25.9 (74)                               | 40.2 (115) | 30.1 (86)  | 3.1 (9)  | 0.7 (2) |
|                                    | Psychiatric                                 | 45.5 (274)          | 47.2 (659)                             | 10.6 (29)                               | 47.8 (131) | 37.2 (102) | 4.0 (11) | 0.4 (1) |
|                                    | Respiratory                                 | 38.7 (233)*         | 33.4 (466)                             | 16.3 (38)                               | 42.5 (99)  | 36.9 (86)  | 3.4 (8)  | 0.9 (2) |
|                                    | Eye, ear, nose and throat                   | 24.9 (150)**        | 16.6 (231)                             | 42.0 (63)                               | 27.3 (41)  | 24.7 (37)  | 4.0 (6)  | 2.0 (3) |
|                                    | Endocrine                                   | 24.4 (147)**        | 13.3 (186)                             | 7.5 (11)                                | 34.0 (50)  | 46.9 (69)  | 8.8 (13) | 2.7 (4) |
| Two or more domains<br>(n = 386)   | Psychiatric + Respiratory                   | 39.6 (153)          | 35.9 (292)                             | 9.8 (15)                                | 47.7 (73)  | 38.6 (59)  | 3.3 (5)  | 0.7 (1) |
|                                    | Psychiatric + Musculoskeletal               | 35.2 (136)          | 31.0 (252)                             | 5.1 (7)                                 | 46.3 (63)  | 44.1 (60)  | 4.4 (6)  | 0       |
|                                    | Respiratory + Musculoskeletal               | 31.3 (121)*         | 22.9 (186)                             | 9.1 (11)                                | 42.1 (51)  | 43.8 (53)  | 4.1 (5)  | 0.8 (1) |
|                                    | Respiratory + Endocrine                     | 20.2 (78)**         | 7.7 (63)                               | 5.1 (4)                                 | 35.9 (28)  | 50.0 (39)  | 7.7 (6)  | 1.3 (1) |
|                                    | Psychiatric + Endocrine                     | 19.2 (74)**         | 10.2 (83)                              | 5.4 (4)                                 | 36.5 (27)  | 47.3 (35)  | 9.5 (7)  | 1.4 (1) |
| Three or more domains<br>(n = 254) | Psychiatric + Respiratory + Musculoskeletal | 35.8 (91)*          | 28.3 (133)                             | 5.5 (5)                                 | 44.0 (40)  | 47.3 (43)  | 3.3 (3)  | 0       |
|                                    | Psychiatric + Haematological + Endocrine    | 22.4 (57)**         | 10.2 (48)                              | 3.5 (2)                                 | 40.4 (23)  | 47.4 (27)  | 7.0 (4)  | 1.8 (1) |
|                                    | Respiratory + Musculoskeletal + Endocrine   | 18.9 (48)**         | 7.4 (35)                               | 2.1 (1)                                 | 31.3 (15)  | 60.4 (29)  | 6.3 (3)  | 0       |
|                                    | Vascular + Respiratory + Endocrine          | 18.5 (47)**         | 6.8 (32)                               | 0                                       | 27.7 (13)  | 63.8 (30)  | 6.4 (3)  | 2.1 (1) |
|                                    | Psychiatric + Vascular + Respiratory        | 18.1 (46)*          | 12.3 (58)                              | 2.2 (1)                                 | 28.3 (13)  | 65.2 (30)  | 2.2 (1)  | 2.2 (1) |

<sup>a</sup> For 1 domain only, denominator (n = 582), <sup>b</sup> For 1+ domains, denominator (n = 1395), <sup>c</sup> For 2+ domains, denominator (n = 813), <sup>d</sup> For 3+ domains, denominator (n = 470)

\* Chi square test significant at .05 level vs Non-Aboriginal

\*\* Chi square test significant at .001 level vs Non-Aboriginal

### Multimorbidity Severity Index

Overall, GLM analysis revealed a significantly greater severity of disease among the street health cohort. Controlling for age and gender, street health patients (M = 1.4, SD = .91) had significantly higher multimorbidity severity than mainstream patients (M = 1.1, SD = .80),  $p < 0.001$ .

A significantly greater proportion of the street health patients were represented in the moderate (34.1%, 883/2587, 95% confidence interval 32.3 to 35.9%),  $p < 0.001$ , and severe categories (4.9%, 126/2587, 95% CI 4.1 to 5.8%),  $p < 0.001$ , compared with mainstream patients (moderate: 21.0%, 961/4583, 95% CI 19.8 to 22.2%; severe: 1.2%, 53/4583, 95% CI, 0.9 to 1.5%). When multimorbidity severity was stratified by age (Figure 4), a greater proportion of street health patients were again represented in the moderate and severe categories across every age category.

Overall, 24.4% (632/2587) of street health patients compared to 10.1% (463/4583) of mainstream patients had at least one level 3 or level 4 score across domains,  $p < 0.001$ . For patients with multimorbidity, this was 44.2% (530/1199) for street health cohort vs 18.3% (420/2294) of mainstream patients,  $p < 0.001$ .

Figure 5 shows the frequency trends of number of domains with level 3 or 4 scores[20] for patients with multimorbidity across 2+ domains for both cohorts, revealing a more pronounced and earlier onset of increased disease burden in the 25-44 and 45-64 year age group for street health patients but especially Aboriginal patients.

For the street health cohort, Aboriginal patients scored marginally higher on the CIRS Severity Index (M = 1.39, SD = 0.89) compared with non-Aboriginal patients (M = 1.34, SD = 0.91), although this difference was not statistically significant,  $p = 0.610$ .

### Factors Associated with Multimorbidity

Logistic regression analyses using the occurrence of multimorbidity across 2+, 3+ and 5+ domains as the criterion variable showed multimorbidity to be significantly associated with male gender, increasing age and Indigenous status (Table 4). Indigenous status was the strongest predictor of multimorbidity in each model. Aboriginal patients had an 87% increase in the likelihood of displaying multimorbidity across 2+ domains compared with non-Aboriginals. Aboriginal patients were also twice as likely to show multimorbidity across 3+ domains and nearly three times more likely to show multimorbidity across 5+ domains.

**Table 4. Relation between socio-demographic characteristics and the prevalence of multimorbidity**

| Characteristic    | B    | SE  | Odds ratio | 95% CI       |
|-------------------|------|-----|------------|--------------|
| <b>2+ Domains</b> |      |     |            |              |
| Male*             | .36  | .09 | 1.44       | 1.22 to 1.70 |
| Age *             | .04  | .01 | 1.01       | 1.04 to 1.05 |
| Indigenous*       | .63  | .10 | 1.87       | 1.55 to 2.26 |
| <b>3+ Domains</b> |      |     |            |              |
| Male*             | .34  | .10 | 1.41       | 1.17 to 1.70 |
| Age*              | .04  | .01 | 1.04       | 1.04 to 1.05 |
| Indigenous*       | .78  | .10 | 2.17       | 2.17 to 2.66 |
| <b>5+ Domains</b> |      |     |            |              |
| Male*             | .23  | .14 | 1.26       | 0.96 to 1.67 |
| Age*              | .05  | .01 | 1.05       | 1.04 to 1.06 |
| Indigenous*       | 1.04 | .15 | 2.82       | 2.11 to 3.77 |

\*  $p < .001$ 

## DISCUSSION

Research on multimorbidity among street health populations is scarce with little data available on patterns, prevalence or disease severity among particular age or ethnic groups. Existing research has tended to focus on specific areas, such as homelessness and mental health,[27-29] with little attention on the cumulative and synergistic effects of multiple chronic conditions or a broader biopsychosocial approach to health care needs.[4,30] The prevalence of multimorbidity is higher in deprived as opposed to more affluent areas[3,31] with multiple physical diseases often co-existing among patients with mental illness.[4,31,32]

This is the first study to use 42 conditions affecting anatomical domains to estimate patterns and prevalence of multimorbidity among marginalised and homeless patients attending a designated, primary care-run, street-based outreach service. Like our earlier mainstream practices study,[24] we include an estimation of disease severity to enhance the overall picture of multimorbidity burden in this population.

Key findings from our study include that multimorbidity is significantly associated with male gender, increasing age and Indigenous status with the latter the strongest predictor of multimorbidity irrespective of whether 2+, 3+ or 5+ domains are used as the criterion variable.

### Strengths and limitations of the study

The strengths of this study include the large street health cohort size involving the total population seen over a six year period and the fact that we include a disease severity rating for each patient in addition to prevalence and patterns data recorded.

A major difficulty we encountered was enumerating the homeless population mainly because it lacked a common definition.[33] The open access policy to the street health service could have had a

1  
2  
3 diluting effect on proportion of more traditional users of the service because of one-off  
4 opportunistic and convenience attendances. Among street health patients, 22.8% had no  
5 multimorbidity compared with 26.9% among mainstream patients.  
6

7 In addition, whilst the street health population is based on data collected over a six year period, the  
8 comparator mainstream practice data was collected over six months.[24]  
9

### 10 **Prevalence and patterns**

11  
12 Whilst multimorbidity prevalence among street health cohort is lower than mainstream cohort  
13 generally, the age breakdown across 2+ domains shows younger patients as much more vulnerable  
14 to having multiple chronic conditions with a 12% greater likelihood among 23 - 34 year old patients.  
15 This contrasts with findings from our earlier research where prevalence patterns progressively  
16 increased from the 25 – 44 year age group to the 45 – 64 and 65 -74 year age groups.[24] The reason  
17 for multimorbidity peaking in the 25 - 44 year age group in the street health population could be  
18 explained by the premature deaths of these patients or the possibility that those surviving to older  
19 age start attending mainstream practices or become institutional residents.  
20  
21

22  
23 A key finding from our study is the willingness of Aboriginal patients to attend the street health  
24 service - 29.6% v. 1.6% to Australian primary care practices[34] – and that Aboriginal patients overall  
25 are significantly younger – 36.8% v. 18.9% under 25 years old - than non-Aboriginal patients. Among  
26 the street health population, Aboriginal patients have significantly higher rates of multimorbidity  
27 across all age groups and number of domains affected.  
28  
29

30  
31 The high prevalence of psychiatric morbidity (46.7%) was not unexpected. The three most common  
32 domains - psychiatric, musculoskeletal (42.9%) and respiratory (35.0%) - are similar to mainstream  
33 except that psychiatry and musculoskeletal are juxtaposed.[24] These three domains remain most  
34 common even when 2+ or 3+ domains are examined and may act to facilitate or accelerate other  
35 morbidities resulting in premature ageing or progressive deterioration. The possibility that early  
36 onset of psychiatric illness may in turn contribute to a cascade of homelessness, lack of stable  
37 relationships and failure to achieve educational potential should be considered.  
38  
39

### 40 **Disease severity**

41  
42 Disease severity burden is of particular value in disadvantaged populations because the cumulative  
43 and synergistic nature of their multimorbidities impacts on their need for appropriate health  
44 services[30] while their socioeconomic circumstances renders their access to such services  
45 inequitable. We found the multimorbidity SI significantly higher for street health patients, more  
46 pronounced with 'moderate' and 'severe' morbidity and persisting across all age categories.  
47 Although overall prevalence is lower in the street health cohort, where disease exists it tends to be  
48 of significantly greater severity. This is also reflected in the domain Level 3 and Level 4 scores,  
49 supporting earlier research by Starfield and Kinder[35] that morbidities are not randomly distributed  
50 amongst populations. Instead, those with the highest vulnerability to illness have a greater  
51 disadvantage because the clustering of morbidities in these sub-populations diminishes their quality  
52 of life.[3] Multimorbidity in such circumstances impacts negatively not just on their functioning  
53 status[36,37] but also causes increased and poorly co-ordinated use of health services,[5] increased  
54 direct and indirect healthcare costs[6] and heightens the risk of premature death.[38,39]  
55  
56  
57  
58  
59  
60

## Conclusion

Our study reports on the prevalence, patterns and disease severity of multimorbidity among a marginalised population attending a primary care-led, street health clinic in Western Australia. Overall, the probability of early onset (23-34 years) multimorbidity is higher in the street health cohort compared with mainstream practice but not in patients aged over 45 years with psychiatric, musculoskeletal and respiratory the commonest domains affected. For Aboriginal patients, the prevalence of multimorbidity is higher across all ages but especially if aged < 25 years.

Disease severity is significantly higher in the street health population, especially Aboriginal patients, with greater 'moderate' and 'severe' morbidity and persists across all age categories. Attendance patterns for Aboriginal patients suggest they are more likely to engage with street-based, outreach service than mainstream practice. Reasons for this increased engagement warrant further investigation. Our findings have implications on the design and delivery of health care services to meet the increasing challenge of multimorbidity[4,40] in disadvantaged and Indigenous populations.

## WHAT THIS PAPER ADDS:

### What is already known on this subject

Marginalised and homeless people have more chronic diseases, high mortality rates, high direct and indirect health care costs and generally make poor utilisation of available health services. Mental illness, drug and alcohol abuse are especially common in homeless people. The Inverse Care Law[11] ensures that those in greatest need generally receive the least treatment.

### What this study adds

Our study shows multimorbidity amongst street health patients is common, more severe and exists across all anatomical domains with younger patients (23-34 year olds) and Aboriginal patients especially vulnerable. Among the street health population, multimorbidity is significantly associated with male gender, increasing age and Indigenous status. Aboriginal patients comprise 29.6% of the street health cohort which compares favourably with the 1.6% attending mainstream Australian practices and offers hope for greater engagement of basic health services into the future.

## ACKNOWLEDGEMENTS

We acknowledge the assistance of the staff at the Freo Street Doctor clinic, Fremantle Medicare Local and the medical practice involved in the study. We acknowledge the assistance of Drs Maeve Kiely and Cam Phan with data acquisition. Research support was received from The Australian Commonwealth Government Primary Health Care Research Evaluation and Development (PHCRED) Strategy Phase 2. The General Practice and Primary Health Care Research Unit is partly funded under the Collaborative Research Network (CRN) Program Grant from the Australian Government Department of Education to the University of Notre Dame Australia. We also acknowledge financial support from J Galvin, W Cunningham, L Ryan and A Neale.

**CONFLICT DISCLOSURE**

All authors have completed the ICMJE uniform disclosure form at [www.icmje.org/coi\\_disclosure.pdf](http://www.icmje.org/coi_disclosure.pdf) and declare: TB, DAR, LT and RGM have received research grant funding; DAR has received support from research donations; no other relationships or activities that could appear to have influenced the submitted work.

**DATA SHARING STATEMENT**

No additional data are available

**CONTRIBUTORS**

TB and DAR made substantial contributions to the conception and design of the work as well as the acquisition, analysis and interpretation of data for the study.

LT and MB made substantial contributions to the analysis and interpretation of data.

RGM made substantial contributions to the acquisition of data.

TB, DAR and LT were responsible for drafting the manuscript and all authors revised it critically for important intellectual content, final approval of the version to be published and agree to be accountable for all aspects of the work in ensuring that questions related to the accuracy or integrity of any part of the work are appropriately investigated and resolved.



**REFERENCES**

1. Barnett K, Mercer SW, Norbury M, et al. Epidemiology of multimorbidity and implications for health care, research, and medical education: a cross-sectional study. *Lancet* 2012;**380**:37-43 doi: 10.016/S0140-6736(12)60240-2.
2. Fortin M, Lapointe L, Hudon C, et al. Multimorbidity and quality of life in primary care: a systematic review. *Health and Quality of Life Outcomes* 2004;**2**:51.
3. Mercer S, Watt G. The Inverse Care Law: Clinical primary care encounters in deprived and affluent areas of Scotland. *Ann Fam Med* 2007;**5**:503-10.
4. Payne R, Gray A, Guthrie B, et al. The effect of physical multimorbidity, mental health conditions and socioeconomic deprivation on unplanned admissions to hospital: a retrospective cohort study. *CMAJ* 2013;**185**(5):E221-8 doi: 10.1503/cmaj.121349.
5. Salisbury C, Johnson L, Purdy S, et al. Epidemiology and impact of Multimorbidity in primary care: a retrospective cohort study. *Br J Gen Pract* 2011;**61**:18-24.
6. Hoffman C, Rice D, Hai-Yen S. Persons with chronic conditions - their prevalence and costs. *JAMA* 1996;**276**:1473-79.
7. Sadowski L, Kee R, VanderWeele T, et al. Effect of a housing and case management program on emergency department visits and hospitalizations among chronically ill homeless adults. *JAMA* 2009;**301**:1771-8.
8. Glynn L, Valderas JM, Healy P, et al. The prevalence of Multimorbidity in primary care and its effect on health care utilisation and cost. *Fam Pract* 2011(28):516-23 doi: 10.1093/fampra/cmr013.
9. Hwang S, Wilkins R, Tjepkema M, et al. Mortality among residents of shelters, rooming houses, and hotels in Canada: 11 year follow-up study. *BMJ* 2009;**339**:b4036 doi: 10.1136/bmj.b4036.
10. Lantz P, House J, Lepkowski J, et al. Socioeconomic factors, health behaviors, and mortality: results from a nationally representative prospective study of US adults. *JAMA* 1998; **279**:1703-08.
11. Tudor-Hart J. The inverse care law. *Lancet* 1971;**1**:405-12.
12. Fazel S, Khosla V, Doll H, et al. The prevalence of mental disorders among the homeless in western countries: systematic review and meta-regression analysis. *PLoS Medicine* 2008;**5**(12):e225 doi: 10.1371/journal.pmed.0050225
13. Shaw M, Dorling D, Brimblecombe N. Life chances in Britain by housing wealth and for the homeless and vulnerably housed. *Environment and Planning A* 1999;**31**:2239-48.
14. Riley A, Harding G, Underwood M, et al. Homelessness: a problem for primary care? . *Br J Gen Pract* 2003;**55**:474-79.
15. Gunn JM, Ayton DR, Densley K, et al. The association between chronic illness, multimorbidity and depressive symptoms in an Australian primary care cohort. *Social Psychiatry and Psychiatric Epidemiology* 2012;**47**:175-84.
16. Bloch G, Rozmovits L, Giambone B. Barriers to primary care responsiveness to poverty as a risk factor for health. *BMC Family Practice* 2011;**12**:62 doi: 10.1186/1471-2296-12-62.
17. Gelberg L, Gallagher T, Andersen R, et al. Competing priorities as a barrier to medical care among homeless adults in Los Angeles. *Am J Public Health* 1997;**87**:217-20.
18. Jeal N, Salisbury C. Self reported experiences of health services among female street-based prostitutes: a cross sectional survey. *Br J Gen Pract* 2004;**54**:215-19.
19. Cummings M, Kang M. Youth health services - improving access to primary care. *Australian Family Physician* 2012;**41**:339-41.
20. Miller MD, Paradis CF, Houck PR, et al. Rating Chronic Medical Illness Burden in Geropsychiatric Practice and Research: Application of the Cumulative Illness Rating Scale *Psychiatric Res* 1992;**41**:237-48 doi: [http://dx.doi.org/10.1016/0165-1781\(92\)90005-N](http://dx.doi.org/10.1016/0165-1781(92)90005-N).
21. Murray S, Skull S. Hurdles to health: immigrant and refugee health care in Australia. . *Aus Health Rev* 2005;**29**:25-29.

- 1
- 2
- 3 22. Parslow R, Jorm A, Christensen H, et al. Factors associated with young adults obtaining general
- 4 practitioner services. *Aus Health Rev* 2002;;**25**:109-17.
- 5 23. Shadmi E. Multimorbidity and equity in health. *International J for Equity in Health* 2013;**12**:59
- 6 doi: doi:10.1186/1475-9276-12-59.
- 7 24. Brett T, Arnold-Reed D, Popescu A, et al. Multimorbidity in patients attending 2 Australian
- 8 primary care practices. *Ann Fam Med* 2013;**11**:535-42 doi: 10.1370/afm.1570.
- 9 25. Hudon C, Fortin M, Soubhi H. Abbreviated guidelines for scoring Cumulative Illness Rating Scale
- 10 (CIRS) in family practice. *J Clin Epidemiol* 2007;**60**:212.
- 11 26. O'Halloran J, Miller G, Britt H. Defining chronic conditions for primary care with ICPC-2. *Fam*
- 12 *Pract* 2004;**21**:381-86.
- 13 27. Hermann H, Evert H, Harvey C, et al. Disability and service use among homeless people living
- 14 with psychotic disorders. *Aust NZ J Psychiatry* 2004;**38**:965-74.
- 15 28. Teesson M, Hodder T, Buhrich N. Psychiatric disorders in homeless men and women in inner
- 16 Sydney. *Aust NZ J Psychiatry* 2004;**38**:162-68.
- 17 29. Trevena L, Nutbeam D, Simpson J. Asking the right questions of disadvantaged and homeless
- 18 communities: the role of housing, patterns of illness and reporting behaviours in the
- 19 measurement of health status. *Aust NZ J Public Health* 2001;**25**:298-304.
- 20 30. Bayliss E, Ellis J, Steiner J. Seniors' self-reported multimorbidity captured biopsychosocial factors
- 21 not incorporated into two other data-based morbidity measures. *J Clin Epidemiol*
- 22 2009;**62**:550-57.
- 23 31. Orueta J, Nuno-Solinis R, Garcia-Alvarez A, et al. Prevalance of multimorbidity according to the
- 24 deprivation level among the elderly in the Basque Country. *BMC Public Health* 2013;**13**:918.
- 25 32. Andrade L, Bensenor I, Viana M, et al. Clustering of psychiatric and somatic illnesses in the
- 26 general population: multimorbidity and socioeconomic correlates. *Braz J Med* 2010;**43**:483-
- 27 91.
- 28 33. Fitzpatrick-Lewis D, Ganann R, Krisnaratne S, et al. Effectiveness of interventions to improve the
- 29 health and housing status of homeless people: a rapid systematic review. *BMC Public Health*
- 30 2011;**11**:638.
- 31 34. Britt H, Miller G, Charles J, et al. A decade of Australian general practice activity 2002-03 to 2011-
- 32 12. General practice series. Sydney: Sydney University Press, 2012.
- 33 35. Starfield B, Kinder K. Multimorbidity and its measurement. *Health Policy* 2011;**103**:3-8.
- 34 36. Bayliss E, Bayliss M, Ware J, et al. Predicting declines in physical function in persons with multiple
- 35 chronic conditions: what we can learn from the medical problem list. *Health and Quality of*
- 36 *Life Outcomes* 2004;**2**:47-51.
- 37 37. Lawson K, Mercer S, Wyke S, et al. Double trouble: the impact of Multimorbidity and deprivation
- 38 on preference-weighted health related quality of life - a cross-sectional analysis of the
- 39 Scottish Health Survey. *International J for Equity in Health* 2013;**12**:12: 67 doi:
- 40 10.1186/1475-9276-12-67.
- 41 38. Gijzen R, Hoeymans N, Schellevis F, et al. Causes and consequences of comorbidity: A review. *J*
- 42 *Clin Epidemiol* 2001;**54**:661-74.
- 43 39. Yancik R, Wesley M, Ries L, et al. Comorbidity and age as predictors of risk for early mortality of
- 44 male and female colon carcinoma patients: a population based study. *Cancer* 1998;**82**:2123-
- 45 34.
- 46 40. Tinetti M, Fried T, Boyd C. Designing health care for the most common chronic condition -
- 47 multimorbidity. *JAMA* 2012:2493-94.
- 48
- 49
- 50
- 51
- 52
- 53
- 54
- 55
- 56
- 57
- 58
- 59
- 60

**FIGURE LEGENDS**

**Figure 1.** Prevalence of multimorbidity within age groups

**Figure 2.** Probability of multimorbidity (2+ domains) as a function of age

**Figure 3.** Prevalence of multimorbidity in Street Health sample stratified by age and Indigenous status

**Figure 4.** Severity Index distribution within age groups

**Figure 5.** Frequency trends of number of domains with Level 3 or 4 scores

1  
2  
3  
4  
5  
6  
7  
8  
9  
10  
11  
12  
13  
14  
15  
16  
17  
18  
19  
20  
21  
22  
23  
24  
25  
26  
27  
28  
29  
30  
31  
32  
33  
34  
35  
36  
37  
38  
39  
40  
41  
42  
43  
44  
45  
46  
47  
48  
49  
50  
51  
52  
53  
54  
55  
56  
57  
58  
59  
60

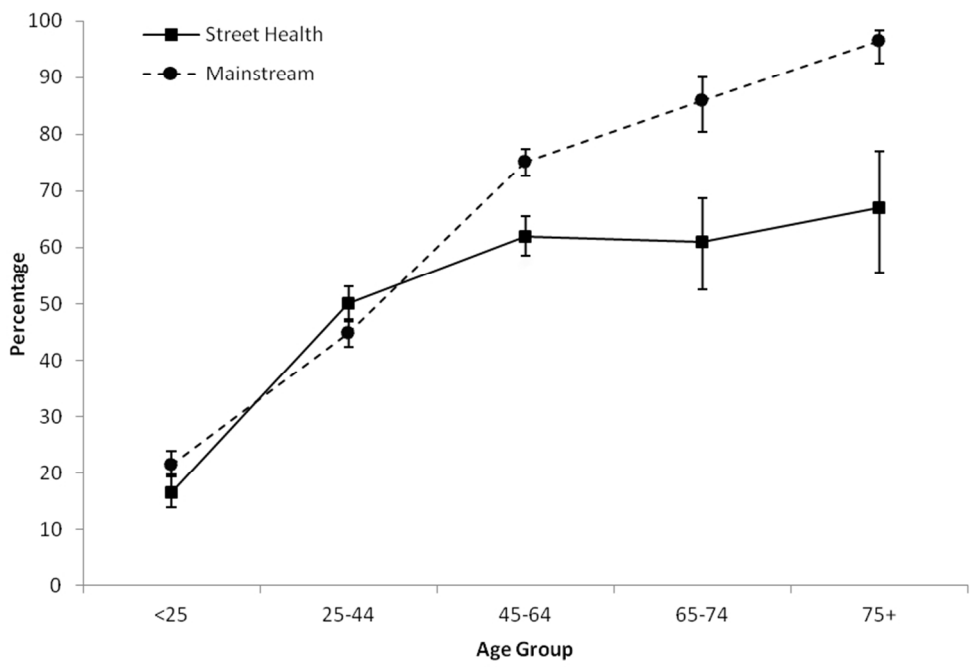

79x55mm (300 x 300 DPI)

view only

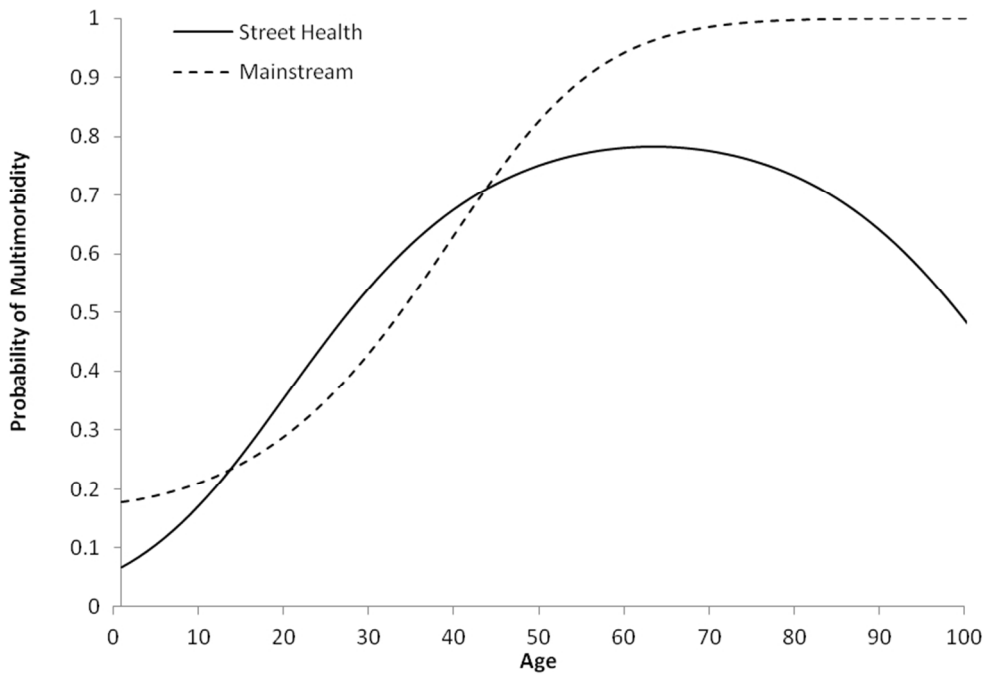

75x51mm (300 x 300 DPI)

Review only

1  
2  
3  
4  
5  
6  
7  
8  
9  
10  
11  
12  
13  
14  
15  
16  
17  
18  
19  
20  
21  
22  
23  
24  
25  
26  
27  
28  
29  
30  
31  
32  
33  
34  
35  
36  
37  
38  
39  
40  
41  
42  
43  
44  
45  
46  
47  
48  
49  
50  
51  
52  
53  
54  
55  
56  
57  
58  
59  
60

1  
2  
3  
4  
5  
6  
7  
8  
9  
10  
11  
12  
13  
14  
15  
16  
17  
18  
19  
20  
21  
22  
23  
24  
25  
26  
27  
28  
29  
30  
31  
32  
33  
34  
35  
36  
37  
38  
39  
40  
41  
42  
43  
44  
45  
46  
47  
48  
49  
50  
51  
52  
53  
54  
55  
56  
57  
58  
59  
60

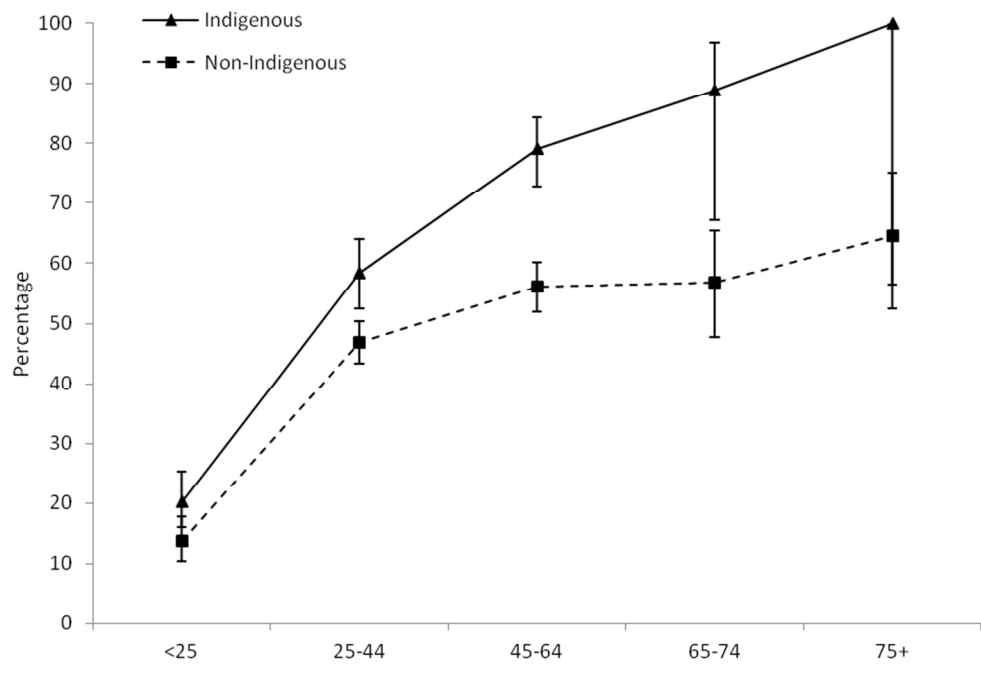

80x54mm (300 x 300 DPI)

view only

1  
2  
3  
4  
5  
6  
7  
8  
9  
10  
11  
12  
13  
14  
15  
16  
17  
18  
19  
20  
21  
22  
23  
24  
25  
26  
27  
28  
29  
30  
31  
32  
33  
34  
35  
36  
37  
38  
39  
40  
41  
42  
43  
44  
45  
46  
47  
48  
49  
50  
51  
52  
53  
54  
55  
56  
57  
58  
59  
60

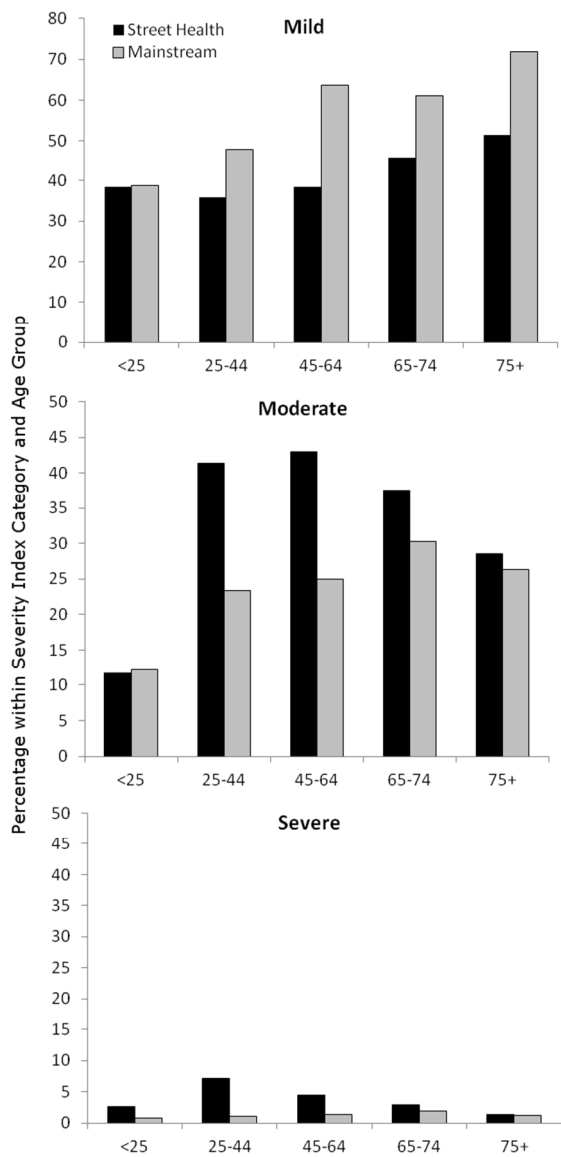

60x116mm (300 x 300 DPI)

1  
2  
3  
4  
5  
6  
7  
8  
9  
10  
11  
12  
13  
14  
15  
16  
17  
18  
19  
20  
21  
22  
23  
24  
25  
26  
27  
28  
29  
30  
31  
32  
33  
34  
35  
36  
37  
38  
39  
40  
41  
42  
43  
44  
45  
46  
47  
48  
49  
50  
51  
52  
53  
54  
55  
56  
57  
58  
59  
60

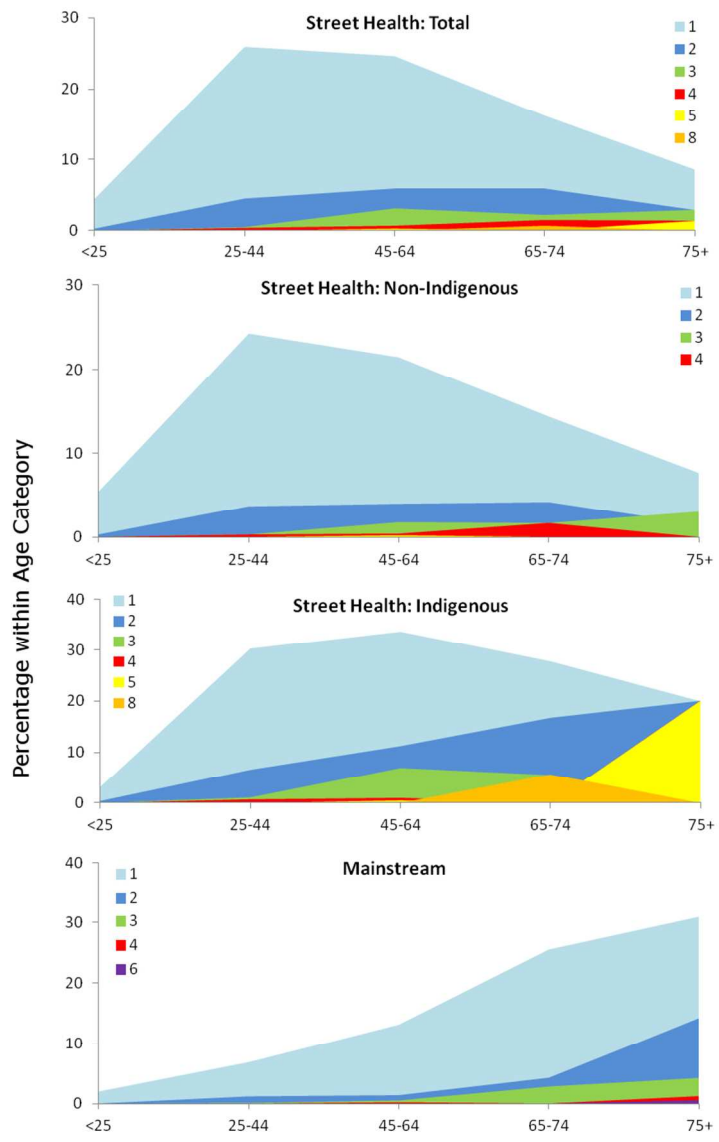

78x123mm (300 x 300 DPI)



## STROBE Statement—checklist of items that should be included in reports of observational studies

|                           | Item No | Recommendation                                                                                                                                                                                                                                                                                                                                                                                                                                                         | Page No (Line No)           |
|---------------------------|---------|------------------------------------------------------------------------------------------------------------------------------------------------------------------------------------------------------------------------------------------------------------------------------------------------------------------------------------------------------------------------------------------------------------------------------------------------------------------------|-----------------------------|
| <b>Title and abstract</b> | 1       | (a) Indicate the study's design with a commonly used term in the title or the abstract                                                                                                                                                                                                                                                                                                                                                                                 | Pg 1, 2                     |
|                           |         | (b) Provide in the abstract an informative and balanced summary of what was done and what was found                                                                                                                                                                                                                                                                                                                                                                    | Pg 2                        |
| <b>Introduction</b>       |         |                                                                                                                                                                                                                                                                                                                                                                                                                                                                        |                             |
| Background/rationale      | 2       | Explain the scientific background and rationale for the investigation being reported                                                                                                                                                                                                                                                                                                                                                                                   | Pg 4                        |
| Objectives                | 3       | State specific objectives, including any prespecified hypotheses                                                                                                                                                                                                                                                                                                                                                                                                       | Pg 4 (39-43)                |
| <b>Methods</b>            |         |                                                                                                                                                                                                                                                                                                                                                                                                                                                                        |                             |
| Study design              | 4       | Present key elements of study design early in the paper                                                                                                                                                                                                                                                                                                                                                                                                                | Pg 2 (8)                    |
| Setting                   | 5       | Describe the setting, locations, and relevant dates, including periods of recruitment, exposure, follow-up, and data collection                                                                                                                                                                                                                                                                                                                                        | Pg 5 (7-12)                 |
| Participants              | 6       | (a) <i>Cohort study</i> —Give the eligibility criteria, and the sources and methods of selection of participants. Describe methods of follow-up<br><i>Case-control study</i> —Give the eligibility criteria, and the sources and methods of case ascertainment and control selection. Give the rationale for the choice of cases and controls<br><i>Cross-sectional study</i> —Give the eligibility criteria, and the sources and methods of selection of participants | Pg 5 (7-12)                 |
|                           |         | (b) <i>Cohort study</i> —For matched studies, give matching criteria and number of exposed and unexposed<br><i>Case-control study</i> —For matched studies, give matching criteria and the number of controls per case                                                                                                                                                                                                                                                 |                             |
| Variables                 | 7       | Clearly define all outcomes, exposures, predictors, potential confounders, and effect modifiers. Give diagnostic criteria, if applicable                                                                                                                                                                                                                                                                                                                               | Pg 5 (34-35)                |
| Data sources/measurement  | 8*      | For each variable of interest, give sources of data and details of methods of assessment (measurement). Describe comparability of assessment methods if there is more than one group                                                                                                                                                                                                                                                                                   | Pg 5 (7-30)                 |
| Bias                      | 9       | Describe any efforts to address potential sources of bias                                                                                                                                                                                                                                                                                                                                                                                                              | -                           |
| Study size                | 10      | Explain how the study size was arrived at                                                                                                                                                                                                                                                                                                                                                                                                                              | Pg 5 (7-12)                 |
| Quantitative variables    | 11      | Explain how quantitative variables were handled in the analyses. If applicable, describe which groupings were chosen and why                                                                                                                                                                                                                                                                                                                                           |                             |
| Statistical methods       | 12      | (a) Describe all statistical methods, including those used to control for confounding                                                                                                                                                                                                                                                                                                                                                                                  | Pg 5 (42-56)<br>Pg 6 (3-29) |
|                           |         | (b) Describe any methods used to examine subgroups and interactions                                                                                                                                                                                                                                                                                                                                                                                                    | Pg 6 (20-23)                |
|                           |         | (c) Explain how missing data were addressed                                                                                                                                                                                                                                                                                                                                                                                                                            | N/A                         |
|                           |         | (d) <i>Cohort study</i> —If applicable, explain how loss to follow-up was addressed<br><i>Case-control study</i> —If applicable, explain how matching of cases and controls was addressed<br><i>Cross-sectional study</i> —If applicable, describe analytical methods taking account of sampling strategy                                                                                                                                                              | N/A                         |
|                           |         | (e) Describe any sensitivity analyses                                                                                                                                                                                                                                                                                                                                                                                                                                  | N/A                         |

| <b>Results</b>           |     |                                                                                                                                                                                                              | <b>Page No<br/>(Line No)</b> |
|--------------------------|-----|--------------------------------------------------------------------------------------------------------------------------------------------------------------------------------------------------------------|------------------------------|
| Participants             | 13* | (a) Report numbers of individuals at each stage of study—eg numbers potentially eligible, examined for eligibility, confirmed eligible, included in the study, completing follow-up, and analysed            | Pg 7 (5)                     |
|                          |     | (b) Give reasons for non-participation at each stage                                                                                                                                                         | N/A                          |
|                          |     | (c) Consider use of a flow diagram                                                                                                                                                                           | N/A                          |
| Descriptive data         | 14* | (a) Give characteristics of study participants (eg demographic, clinical, social) and information on exposures and potential confounders                                                                     | Pg 7 (4-51)                  |
|                          |     | (b) Indicate number of participants with missing data for each variable of interest                                                                                                                          | N/A                          |
|                          |     | (c) <i>Cohort study</i> —Summarise follow-up time (eg, average and total amount)                                                                                                                             | N/A                          |
| Outcome data             | 15* | <i>Cohort study</i> —Report numbers of outcome events or summary measures over time                                                                                                                          | Pg 8 (7-16)                  |
|                          |     | <i>Case-control study</i> —Report numbers in each exposure category, or summary measures of exposure                                                                                                         |                              |
|                          |     | <i>Cross-sectional study</i> —Report numbers of outcome events or summary measures                                                                                                                           |                              |
| Main results             | 16  | (a) Give unadjusted estimates and, if applicable, confounder-adjusted estimates and their precision (eg, 95% confidence interval). Make clear which confounders were adjusted for and why they were included | Pg 8-12                      |
|                          |     | (b) Report category boundaries when continuous variables were categorized                                                                                                                                    | Pg 6<br>(12-13)              |
|                          |     | (c) If relevant, consider translating estimates of relative risk into absolute risk for a meaningful time period                                                                                             | N/A                          |
| Other analyses           | 17  | Report other analyses done—eg analyses of subgroups and interactions, and sensitivity analyses                                                                                                               |                              |
| <b>Discussion</b>        |     |                                                                                                                                                                                                              |                              |
| Key results              | 18  | Summarise key results with reference to study objectives                                                                                                                                                     | Pg 12-13                     |
| Limitations              | 19  | Discuss limitations of the study, taking into account sources of potential bias or imprecision. Discuss both direction and magnitude of any potential bias                                                   | Pg 12 (56)<br>Pg 13 (3-9)    |
| Interpretation           | 20  | Give a cautious overall interpretation of results considering objectives, limitations, multiplicity of analyses, results from similar studies, and other relevant evidence                                   | Pg 14<br>(5-20)              |
| Generalisability         | 21  | Discuss the generalisability (external validity) of the study results                                                                                                                                        | Pg 14<br>(18-19)             |
| <b>Other information</b> |     |                                                                                                                                                                                                              |                              |
| Funding                  | 22  | Give the source of funding and the role of the funders for the present study and, if applicable, for the original study on which the present article is based                                                | Pg 14<br>(44-53)             |

\*Give information separately for cases and controls in case-control studies and, if applicable, for exposed and unexposed groups in cohort and cross-sectional studies.

**Note:** An Explanation and Elaboration article discusses each checklist item and gives methodological background and published examples of transparent reporting. The STROBE checklist is best used in conjunction with this article (freely available on the Web sites of PLoS Medicine at <http://www.plosmedicine.org/>, Annals of Internal Medicine at

1  
2 <http://www.annals.org/>, and Epidemiology at <http://www.epidem.com/>). Information on the STROBE Initiative is  
3 available at [www.strobe-statement.org](http://www.strobe-statement.org).  
4  
5  
6  
7  
8  
9  
10  
11  
12  
13  
14  
15  
16  
17  
18  
19  
20  
21  
22  
23  
24  
25  
26  
27  
28  
29  
30  
31  
32  
33  
34  
35  
36  
37  
38  
39  
40  
41  
42  
43  
44  
45  
46  
47  
48  
49  
50  
51  
52  
53  
54  
55  
56  
57  
58  
59  
60

For peer review only

# BMJ Open

## Multimorbidity in a marginalised, street-health Australian population: A retrospective cohort study

|                                 |                                                                                                                                                                                                                                                                                                                                                                                                                                                                                                                                                                                                                                                                                                                                          |
|---------------------------------|------------------------------------------------------------------------------------------------------------------------------------------------------------------------------------------------------------------------------------------------------------------------------------------------------------------------------------------------------------------------------------------------------------------------------------------------------------------------------------------------------------------------------------------------------------------------------------------------------------------------------------------------------------------------------------------------------------------------------------------|
| Journal:                        | <i>BMJ Open</i>                                                                                                                                                                                                                                                                                                                                                                                                                                                                                                                                                                                                                                                                                                                          |
| Manuscript ID:                  | bmjopen-2014-005461.R1                                                                                                                                                                                                                                                                                                                                                                                                                                                                                                                                                                                                                                                                                                                   |
| Article Type:                   | Research                                                                                                                                                                                                                                                                                                                                                                                                                                                                                                                                                                                                                                                                                                                                 |
| Date Submitted by the Author:   | 05-Jun-2014                                                                                                                                                                                                                                                                                                                                                                                                                                                                                                                                                                                                                                                                                                                              |
| Complete List of Authors:       | Brett, Tom; University of Notre Dame Australia, General Practice and Primary Health Care Research Unit, School of Medicine<br>Arnold-Reed, Diane; University of Notre Dame Australia, General Practice and Primary Health Care Reserach Unit, School of Medicine; University of Western Australia, School of Population Health<br>Troeung, Lakkhina; University of Notre Dame Australia, General Practicite and Primary Health Care Reserach Unit, School of Medicine<br>Bulsara, Max; University of Notre Dame, Biostatistics<br>Williams, Annalisse; Illawarra Shoalhaven Local Health District,<br>Moorhead, Robert; University of Notre Dame Australia, General Practicite and Primary Health Care Reserach Unit, School of Medicine |
| <b>Primary Subject Heading</b>: | General practice / Family practice                                                                                                                                                                                                                                                                                                                                                                                                                                                                                                                                                                                                                                                                                                       |
| Secondary Subject Heading:      | General practice / Family practice                                                                                                                                                                                                                                                                                                                                                                                                                                                                                                                                                                                                                                                                                                       |
| Keywords:                       | PRIMARY CARE, multimorbidity, chronic disease                                                                                                                                                                                                                                                                                                                                                                                                                                                                                                                                                                                                                                                                                            |
|                                 |                                                                                                                                                                                                                                                                                                                                                                                                                                                                                                                                                                                                                                                                                                                                          |

SCHOLARONE™  
Manuscripts

only

**TITLE:** Multimorbidity in a marginalised, street-health Australian population – a retrospective cohort study

**CORRESPONDING AUTHOR:**

Prof Tom Brett  
Director  
General Practice and Primary Health Care Research  
School of Medicine  
The University of Notre Dame Australia  
19 Mouat Street, PO Box 1225  
Fremantle, Western Australia 6959

Tel: +61 8 9433 0571

Email: [tom.brett@nd.edu.au](mailto:tom.brett@nd.edu.au)

**CO-AUTHORS:**

1. Associate Professor Diane E Arnold-Reed  
Research and Development Co-ordinator  
General Practice and Primary Health Care Research  
School of Medicine  
The University of Notre Dame Australia  
19 Mouat Street, PO Box 1225  
Fremantle, Western Australia 6959
2. Dr Lakkhina Troeung  
Biostatistical Support Officer  
General Practice and Primary Health Care Research  
School of Medicine  
The University of Notre Dame Australia
3. Professor Max K Bulsara  
Chair in Biostatistics  
Institute for Health Research  
The University of Notre Dame Australia  
19 Mouat Street, PO Box 1225  
Fremantle, Western Australia 6959
4. Dr Annalisse Williams  
Junior Medical Officer and GP Registrar  
Illawarra Shoalhaven Local Health District  
New South Wales, Australia
5. Professor Robert G Moorhead  
Adjunct Professor  
School of Medicine  
The University of Notre Dame Australia  
19 Mouat Street, PO Box 1225  
Fremantle, Western Australia 6959

**Word count** (excluding title page, abstract, references, figures and tables): **3,829**

## ABSTRACT

**Objectives:** Demographic and presentation profile of patients using an innovative mobile outreach clinic compared with mainstream practice.

**Design:** Retrospective cohort study.

**Setting:** Primary care mobile street health clinic and mainstream practice in Western Australia.

**Participants:** 2587 street health and 4583 mainstream patients.

**Main outcome measures:** Prevalence and patterns of chronic diseases in anatomical domains across entire age spectrum of patients and disease severity burden using Cumulative Illness Rating Scale (CIRS).

**Results:** Lower multimorbidity (2+ CIRS domains) prevalence in street health (46.3%, 1199/2587) than mainstream (50.1%, 2294/4583),  $p=0.003$  when comparing crude estimates but significantly higher when comparing with direct age-sex adjusted mainstream estimate (43.1%, 2000/4583),  $p=0.011$ .

Higher multimorbidity in street health patients <45 years (37.7%, 615/1649) compared to mainstream patients (34.3%, 1017/2961),  $p=0.045$  but significantly lower if 45+ years (62.3%, 584/938 vs 78.7%, 1277/1622,  $p<0.001$ ).

Street health patients showed significantly greater disease severity. Controlling for age and gender, mean CIRS Severity Index score for street health (M = 1.4, SD = 0.91) significantly higher than mainstream patients (M = 1.1, SD = 0.80),  $p<0.001$ . Furthermore, 44.2% (530/1199) of street health patients had at least one level 3 or 4 score across domains compared to 18.3% (420/2294) of mainstream patients,  $p<0.001$ .

Aboriginal patients were 29.6% (766/2587) of street health population with 50.4% (386/766) having multimorbidity vs 44.6% (813/1821) for non-Aboriginals,  $p=0.007$ . No comprehensive data on Indigenous status in mainstream cohort available for comparison.

Musculoskeletal, respiratory and psychiatric domains were most commonly affected with multimorbidity significantly associated with male gender, increasing age and Indigenous status.

1  
2  
3  
4  
5  
6  
7  
8  
9  
10  
11  
12  
13  
14  
15  
16  
17  
18  
19  
20  
21  
22  
23  
24  
25  
26  
27  
28  
29  
30  
31  
32  
33  
34  
35  
36  
37  
38  
39  
40  
41  
42  
43  
44  
45  
46  
47  
48  
49  
50  
51  
52  
53  
54  
55  
56  
57  
58  
59  
60

**Conclusions:** Age-sex adjusted multimorbidity prevalence and disease severity higher in street health cohort . Early onset (23-34 years) multimorbidity is higher in street health cohort but prevalence is lower in 45+ years than mainstream patients. Multimorbidity prevalence is higher for Aboriginal patients of all ages.

For peer review only

**ARTICLE SUMMARY****Strengths and limitations of the study**

- New information on a vulnerable, street-based population accessing an accredited, mobile outreach medical service.
- The large cohort size (n=2587) involving a total street based population seen over a six year period compared with 4583 mainstream patients from similar catchment area.
- Includes a severity rating for each patient in addition to prevalence and patterns of chronic diseases recorded.
- The open access policy to the street health service could have diluted the proportion of more traditional users of the service because of one-off opportunistic and convenience attendances.
- The street health population is based on data collected over a six year period while the comparator mainstream practice data was collected over six months.

**KEY WORDS**

Multimorbidity, chronic disease, primary healthcare, general practice, severity of illness index



## INTRODUCTION

The combination of multiple chronic diseases (multimorbidity) and poor access to primary health care results in serious social, economic and health consequences[1-5] as well as providing considerable challenges for service providers. Marginalised and homeless people have more chronic diseases, high mortality rates, high direct and indirect healthcare costs[6,7] and poor utilisation of primary care health services.[1,8-11] Alcohol and drug related deaths, smoking related diseases, ischemic heart disease and respiratory diseases are especially common.[9] A systematic review[12] found homeless people in Western countries had much greater drug and alcohol dependence compared to age-matched populations while psychotic illnesses and personality disorders were also more common. Canadian homeless and marginally housed people have 32% probability of survival to 75 years among men and 60% among women with housing a key marker for socioeconomic disadvantage.[9] Death rates among 'rough sleepers' in the United Kingdom are 25 times that of the housed population.[13]

Risk factors influencing access to health services include lack of suitable housing,[9,14] mental health problems,[12,15] poor education, unemployment and lack of regular income.[16,17] Social marginalisation impacts negatively on healthcare utilisation including fear of stigmatisation on visiting mainstream practices and waiting rooms.[18] People from Indigenous, non-English speaking and refugee backgrounds often avoid contact with a regular doctor and only seek help when a crisis develops.[19-21] Such individuals have poorer health outcomes[22] exhibiting patterns of chronic, multimorbid disease at a younger age compared to the general population.[23] In Scotland, Mercer[3] found an increased burden of ill-health and multimorbidity in deprived areas resulting in greater demands on primary health care leading to reduced access, less patient-doctor time and more GP stress but less patient enablement.

The "Freo Street Doctor" is an accredited, street-based mobile health clinic established in 2005 to help meet the needs of marginalised and homeless patients unable or unwilling to access mainstream primary health care. It operates from a number of designated areas within Fremantle and surrounding suburbs in Western Australia. Whilst the target population is mainly marginalised and disadvantaged patients, access to the service is unrestricted with electronic records kept for all attendees. The clinic team consists of general practitioners, nurses, outreach workers, Indigenous health workers and social workers. Our study aims to examine the demographic profile of patients using this street health service compared to mainstream primary care practices, the range and severity of morbidities/chronic diseases across anatomical domains and compares these parameters for Aboriginal and non-Aboriginal patients.

## METHOD

### Study Setting

The entire patient cohort attending the “Freo Street Doctor” service over the period 1 January 2006 to 31 December 2011 was examined. Patient data was entered by reception, medical and nursing staff into standard practice software and stored centrally at Fremantle Medicare Local offices. Data for the study were extracted from the central medical records and compared with the total patient population attending a mainstream general practice clinic[24] servicing the same catchment area over the period 1 July to 31 December 2008.

### Data Extraction

Data extraction was undertaken by two GPs and two medical students, all with similar training and prior experience in the use and application of the Cumulative Illness Rating Scale (CIRS). The scoring of chronic conditions using the validated CIRS has been described in detail previously[20,25] as has the Severity Index (SI) classification.[24]

Briefly, records were reviewed and 42 conditions were scored according to CIRS guidelines: 0 = no problems, 1 = mild problems, 2 = moderate morbidity, 3 = severe chronic problems, 4 = extremely severe functional impairment. Conditions were categorised into 14 anatomical domains. Maximum scores for each domain were added to yield a total score ranging from 0 to 56 for each patient. The total score was then divided by the number of domains with morbidities to generate a CIRS score for each patient ranging from 0 to 4. Severity ratings were defined as 0 = none/low, 1 = mild, 2 = moderate and 3/4 = severe.

The street health dataset contained a large number of one-off consultations. Some attendees had no fixed abode with many using drop-in centres as proxy addresses. As far as possible, data extractors took precautions to guard against double counting. There may have been some limited cross over between street and mainstream practices but, in general, patients attending one service tended to continue doing so.

### Operational Definition

Our operational definition of multimorbidity was the co-occurrence of conditions across two or more (2+) domains in individual patients.[26] After data extraction was completed, a random sample of 30 patients across the entire age spectrum for both clinics was re-assessed to measure consistency among raters.

### Data Analysis

Data analysis was conducted using SPSS 22 (IBM Corporation). All statistical analyses were tested against an alpha level of 0.05 (two-tailed).

Sample characteristics are expressed as means (standard deviation of the mean) for continuous variables and as frequencies (percentages) for categorical variables. Independent samples t-tests and Chi-Square tests were used to examine any demographic differences between the two samples.

The crude prevalence of multimorbidity was calculated as the number of patients with long-term conditions in 2+ morbidity domains as a proportion of the total sample. Given significant differences in age-sex distribution between the two samples, age-sex adjusted prevalence was calculated for the mainstream sample using direct standardisation to the street health cohort. Chi-square tests were used to examine prevalence differences between the two cohorts. Patterns of multimorbidity are expressed as frequencies.

In addition, to examine age of onset of multimorbidity, we modelled the probability of multimorbidity as a function of age. First, a logistic regression analysis was run with the presence of multimorbidity as the dependent variable, and clinic, age, and age squared (given the non-linear relationship between age and multimorbidity) as independent variables (IV). The regression coefficients ( $\beta$ ) for each IV were then used to model the probability of multimorbidity as a function of age in each sample.

Multimorbidity severity was examined using the CIRS SI score as well as distribution of patients within each CIRS severity category. General linear modelling (GLM) was used to examine differences in multimorbidity severity between the two samples, controlling for age and gender. We also counted and compared the number of patients with at least one level 3 or 4 score across CIRS domains,[20] as well as the number of domains with a level 3 or 4 score for each patient as additional indicators of disease severity.

Subgroup analysis was conducted to examine the prevalence and severity of multimorbidity in Indigenous and non-Indigenous patients in the street health cohort. There was no data on Indigenous status in the mainstream cohort for comparison.

1  
2  
3 We also examined the relationship between demographic characteristics and the presence of  
4 multimorbidity across 2, 3, and 5 domains using a series of logistic regression analyses.  
5  
6

7  
8 Inter-rater reliability between data extractors was assessed using Cronbach's alpha.  
9

### 10 **Ethics**

11  
12 Ethics approval for the study was obtained from The University of Notre Dame Australia Human  
13 Research Ethics Committee.  
14  
15  
16  
17  
18  
19  
20  
21  
22  
23  
24  
25  
26  
27  
28  
29  
30  
31  
32  
33  
34  
35  
36  
37  
38  
39  
40  
41  
42  
43  
44  
45  
46  
47  
48  
49  
50  
51  
52  
53  
54  
55  
56  
57  
58  
59  
60

## RESULTS

## Patient Characteristics

A total of 2587 patients attended the street health service and 4583 attended mainstream practice over the study periods. The age and gender distribution of patients at both clinics are shown in Table 1. The mean age of street health patients was 37.8 years (SD = 18.7) compared with 36.2 (SD = 21.1) for the mainstream practice. There were no significant differences in age between the two cohorts,  $p=0.055$ , but a significant difference in gender distribution was observed. The majority of the street health patients were male (57.3%, 1482/2587) while the majority of patients attending mainstream practice were female (60.7%, 2783/4583),  $p<0.001$ .

Table 1. Age and Gender Distribution for Study Population

|                              | Fremantle Street Doctor       |                                 |                                      | Mainstream practice<br>( <i>n</i> = 4583) |
|------------------------------|-------------------------------|---------------------------------|--------------------------------------|-------------------------------------------|
|                              | Overall<br>( <i>n</i> = 2587) | Aboriginal<br>( <i>n</i> = 766) | Non-Aboriginal<br>( <i>n</i> = 1821) |                                           |
| Sex, % ( <i>n</i> )          |                               |                                 |                                      |                                           |
| Male                         | 57.3 (1482)                   | 50.3 (385)                      | 60.2 (1097)                          | 39.3 (1800)                               |
| Female                       | 42.7 (1105)                   | 49.7 (381)                      | 39.8 (724)                           | 60.7 (2783)                               |
| Age, mean (SD) [range]       |                               |                                 |                                      |                                           |
| Overall                      | 37.8 (18.7)<br>[0 to 103]     | 32.09 (17.9)<br>[0 to 81]       | 40.19 (18.5)<br>[0 to 103]           | 36.18 (21.1)<br>[0 to 98]                 |
| Male                         | 39.1 (18.5)<br>[0 to 103]     | 31.8 (18.1)<br>[1 to 81]        | 41.6 (17.9)<br>[0 to 103]            | 35.1 (22.3)<br>[0 to 92]                  |
| Female                       | 36.1 (18.7)<br>[0 to 90]      | 32.3 (17.7)<br>[0 to 75]        | 38.0 (18.9)<br>[0 to 90]             | 36.9 (20.3)<br>[0 to 98]                  |
| Age Category, % ( <i>n</i> ) |                               |                                 |                                      |                                           |
| < 25                         | 24.2 (626)                    | 36.8 (282)                      | 18.9 (344)                           | 28.9 (1326)                               |
| 25 to 44                     | 39.5 (1023)                   | 35.8 (274)                      | 41.1 (749)                           | 35.7 (1635)                               |
| 45 to 64                     | 28.3 (732)                    | 24.4 (187)                      | 29.9 (545)                           | 27.1 (1243)                               |
| 65 to 74                     | 5.3 (136)                     | 2.3 (18)                        | 6.5 (118)                            | 4.6 (211)                                 |
| 75+                          | 2.7 (70)                      | 0.7 (5)                         | 3.6 (65)                             | 3.7 (168)                                 |

Aboriginal patients were 29.6% (766/2587) of the street health sample. On average, Aboriginal patients were significantly younger than non-Aboriginal patients, with 36.8% (282/766) under the age of 25 compared with only 18.9% (344/1821) of non-Aboriginals,  $p<0.001$ . The majority of non-Aboriginal patients were male (60.2%, 1097/1821) while there was a more even gender distribution for Aboriginal patients attending the street health service (male 50.3%, 385/766),  $p<0.001$ .

## Inter-rater Reliability

1  
2  
3 Inter-rater reliability between data extractors was tested on CIRS scores and number of domains  
4 with morbidities for 30 randomly selected patients from each of the two cohorts. For the street  
5 health cohort, the intraclass correlation coefficient (ICC) was 0.94 (95% confidence interval 0.89 to  
6 0.97) for number of domains with morbidities and 0.96 (95% CI 0.93 to 0.98) for total CIRS scores  
7 indicating high inter-rater reliability. For the mainstream practice sample, the ICC was 0.98 (95% CI  
8 0.97 to 0.99) for number of domains with morbidities and 0.98 (95% CI 0.97 to 0.99) for CIRS scores.  
9  
10  
11  
12

### 13 14 **Prevalence of Multimorbidity**

15 Overall, the crude prevalence of multimorbidity was lower in the street health sample.

16 Multimorbidity, based on the presence of conditions affecting 2+ domains, was present in 46.3%  
17 (1199/2587, 95% confidence interval 44.4 to 48.3%) of street health patients, compared with 50.1%  
18 (2294/4583, 95% CI 48.6 to 51.5%) of the mainstream sample,  $p=0.003$ . A total of 28.0% (724/2587)  
19 of the street health cohort had multimorbidity in 3+ domains compared with 31.9% (1464/4583) of  
20 mainstream patients,  $p<0.001$ . Across 5+ domains, 10% (259/2587) of street health patients showed  
21 multimorbidity compared with 12.8% (587/4583) of the mainstream sample,  $p<0.001$ .  
22  
23  
24  
25  
26  
27

28 Figure 1 shows the crude prevalence of multimorbidity across 2+ domains for both samples across  
29 age groups. The prevalence of multimorbidity among young street health patients aged < 45 years  
30 (37.7%, 615/1649) was significantly higher than in the mainstream sample (34.3%, 1017/2961),  
31  $p=0.045$ . Multimorbidity prevalence was significantly lower in the street health sample for patients  
32 45+ years (62.3% [584/938] vs 78.7% [1277/1622], respectively),  $p<0.001$ .  
33  
34  
35  
36  
37

38 After direct age-sex adjustment of the mainstream prevalence rate, the prevalence of  
39 multimorbidity was significantly higher in the street health (46.3%, 1199/2587) than mainstream  
40 sample (43.1%, 2000/4583),  $p=0.011$ .  
41  
42  
43  
44

45 Age of onset of multimorbidity was different for the two populations (Figure 2). For street health  
46 patients, the probability of multimorbidity peaked between 61 and 67 years,  $P(E_{\text{STREET HEALTH}})=0.78$ ,  
47 and then decreased. For mainstream patients, the probability of multimorbidity increased with age,  
48 with the greatest probability of multimorbidity observed for individuals aged over 70 years,  $P$   
49 ( $E_{\text{MAINSTREAM}})=0.99$ . Between the ages of 14 and 43, the probability of multimorbidity was higher for  
50 street health patients,  $P(E_{\text{STREET HEALTH}})=0.26$  to  $0.71$  vs.  $P(E_{\text{MAINSTREAM}})=0.24$  to  $0.69$ , suggesting that  
51 younger street health patients are particularly vulnerable to multimorbidity. The greatest difference  
52 was observed between the ages of 23 and 34,  $P(E_{\text{STREET HEALTH}})=0.43$  to  $0.62$  vs.  $P(E_{\text{MAINSTREAM}})=0.33$   
53  
54  
55  
56  
57  
58  
59  
60

1  
2  
3 to 0.52, with street health patients showing a mean 12% greater chance of multimorbidity than  
4 mainstream patients in this age group.  
5  
6

7  
8 Overall for the street health Aboriginal patients, multimorbidity (2+ domains) was present in 50.4%  
9 (386/765, 95% confidence interval 46.9 to 53.9%) compared with 44.6% (813/1821, 95% CI 42.4 to  
10 46.9%) in non-Aboriginals,  $p=0.007$ . A total of 33.2% of Aboriginal patients (254/766) had 3+  
11 domains affected compared with 25.8% (470/1821) in non-Aboriginals,  $p<0.001$ , while 13.7%  
12 (105/765) had 5+ domains affected compared with 8.5% (154/1821) in non-Aboriginals,  $p<0.001$ .  
13 Stratified by age, the prevalence of multimorbidity (2+) across all age groups was significantly higher  
14 among Aboriginal compared with non-Aboriginal patients,  $p<0.001$  (Figure 3).  
15  
16  
17  
18  
19

### 20 **Patterns of Multimorbidity**

21  
22 Table 2 displays the prevalence of the five most common body system domain combinations across  
23 single, 1+, 2+, 3+ and 5+ domains for the street health sample with corresponding prevalence rates  
24 in mainstream practice for comparison. Table 2 also displays the prevalence of the five most  
25 common domain combinations stratified by age.  
26  
27  
28  
29

30 Table 3 displays the prevalence of the five most common domain combinations across single, 1+, 2+,  
31 3+ and 5+ domains stratified by Indigenous status and age.  
32  
33  
34

35 Consistent with the CIRS guidelines, patients with conditions that appeared to be ongoing (for  
36 example, leg ulcers, non-healing skin infections and lacerations and scabies infestation) were  
37 included in the musculoskeletal/integumental domain.  
38  
39  
40  
41  
42  
43  
44  
45  
46  
47  
48  
49  
50  
51  
52  
53  
54  
55  
56  
57  
58  
59  
60

Table 2. Overall and age category breakdown for the 5 most common domains for Street Health cohort

|                                       | Domains                                               | Street Health<br>% (n) | Mainstream<br>practice<br>% (n) <sup>a-d</sup> | Age category (Street health cohort only) |            |            |           |           |
|---------------------------------------|-------------------------------------------------------|------------------------|------------------------------------------------|------------------------------------------|------------|------------|-----------|-----------|
|                                       |                                                       |                        |                                                | < 25                                     | 25 to 44   | 45 to 64   | 65 to 74  | 75+       |
| One domain<br>only<br>(n = 798)       | Musculoskeletal                                       | 29.8 (238)**           | 21.8 (231)                                     | 24.2 (58)                                | 49.2 (117) | 19.7 (47)  | 5.9 (14)  | 0.8 (2)   |
|                                       | Psychiatric                                           | 20.3 (162)             | 18.7 (198)                                     | 20.4 (33)                                | 53.7 (87)  | 24.1 (39)  | 1.9 (3)   | 0         |
|                                       | Eye, ear, nose and throat                             | 13.7 (109)*            | 9.7 (103)                                      | 62.4 (68)                                | 18.3 (20)  | 14.7 (16)  | 0.9 (1)   | 3.7 (4)   |
|                                       | Respiratory                                           | 9.4 (75)               | 17.8 (188)                                     | 38.7 (29)                                | 29.3 (22)  | 30.7 (23)  | 1.3 (1)   | 0         |
|                                       | Genitourinary                                         | 6.9 (55)               | 8.5 (90)                                       | 14.5 (8)                                 | 69.1 (38)  | 14.5 (8)   | 1.8 (1)   | 0         |
| One or more<br>domains<br>(n = 1997)  | Psychiatric                                           | 46.7 (933)**           | 34.6 (1161)                                    | 8.6 (80)                                 | 48.9 (456) | 36.5 (341) | 4.7 (44)  | 1.3 (12)  |
|                                       | Musculoskeletal                                       | 42.9 (856)             | 45.2 (1514)                                    | 13.1 (112)                               | 44.6 (382) | 31.8 (272) | 7.1 (61)  | 3.4 (29)  |
|                                       | Respiratory                                           | 35.0 (699)             | 35.6 (1193)                                    | 11.7 (82)                                | 43.2 (302) | 38.6 (270) | 4.9 (34)  | 1.6 (11)  |
|                                       | Eye, ear, nose and throat                             | 19.1 (381)*            | 22.7 (762)                                     | 29.4 (112)                               | 29.7 (113) | 29.7 (113) | 6.3 (24)  | 5.0 (19)  |
|                                       | Vascular                                              | 18.2 (364)**           | 22.3 (746)                                     | 3.3 (12)                                 | 17.6 (64)  | 53.8 (196) | 13.5 (49) | 11.8 (43) |
| Two or more<br>domains<br>(n = 1199)  | Psychiatric + Respiratory                             | 37.1 (445)**           | 18.8 (432)                                     | 7.2 (32)                                 | 48.3 (215) | 39.1 (174) | 4.3 (19)  | 1.1 (5)   |
|                                       | Psychiatric + Musculoskeletal                         | 32.4 (388)**           | 22.2 (510)                                     | 3.6 (14)                                 | 47.2 (183) | 41.8 (162) | 5.7 (22)  | 1.8 (7)   |
|                                       | Respiratory + Musculoskeletal                         | 25.6 (307)*            | 22.4 (515)                                     | 5.9 (18)                                 | 42.3 (130) | 43.3 (133) | 6.8 (21)  | 1.6 (5)   |
|                                       | Vascular + Musculoskeletal                            | 14.6 (175)**           | 19.4 (445)                                     | 2.3 (4)                                  | 17.7 (31)  | 50.9 (89)  | 15.4 (27) | 13.7 (24) |
|                                       | Hepatic-Pancreatic + Psychiatric                      | 14.3 (172)**           | 2.8 (64)                                       | 1.7 (3)                                  | 45.9 (79)  | 45.9 (79)  | 5.3 (9)   | 1.2 (2)   |
| Three or more<br>domains<br>(n = 724) | Psychiatric + Respiratory + Musculoskeletal           | 30.9 (224)**           | 14.7 (215)                                     | 3.6 (8)                                  | 42.4 (95)  | 47.3 (106) | 5.8 (13)  | 0.9 (2)   |
|                                       | Psychiatric + Haematological + Endocrine              | 14.5 (105)             | 14.1 (206)                                     | 3.8 (4)                                  | 37.1 (39)  | 46.7 (49)  | 8.6 (9)   | 3.8 (4)   |
|                                       | Psychiatric + Respiratory + Vascular                  | 14.4 (104)**           | 8.5 (125)                                      | 2.9 (3)                                  | 25.0 (26)  | 60.6 (63)  | 8.7 (9)   | 2.9 (3)   |
|                                       | Psychiatric + Musculoskeletal + Vascular              | 14.2 (103)             | 13.1 (192)                                     | 1.0 (1)                                  | 18.4 (19)  | 60.2 (62)  | 14.6 (15) | 5.8 (6)   |
|                                       | Psychiatric + Respiratory + Lower<br>Gastrointestinal | 13.8 (100)**           | 5.9 (87)                                       | 1.0 (1)                                  | 46.0 (46)  | 50.0 (50)  | 1.0 (1)   | 2.0 (2)   |

<sup>a</sup> For 1 domain only, denominator (n = 1058), <sup>b</sup> For 1+ domains, denominator (n = 3352), <sup>c</sup> For 2+ domains, denominator (n = 2294), <sup>d</sup> For 3+ domains, denominator (n = 1772)

\* Chi square test significant at .05 level vs mainstream practice

\*\* Chi square test significant at .001 level vs mainstream practice



Table 3. Overall and age category breakdown for the 5 most common domains for Aboriginal Street Health patients

|                                    | Domains                                     | Aboriginal<br>% (n) | Non-Aboriginal<br>% (n) <sup>a-d</sup> | Age category (Aboriginal patients only) |            |            |          |         |
|------------------------------------|---------------------------------------------|---------------------|----------------------------------------|-----------------------------------------|------------|------------|----------|---------|
|                                    |                                             |                     |                                        | < 25                                    | 25 to 44   | 45 to 64   | 65 to 74 | 75+     |
| One domain only<br>(n = 216)       | Musculoskeletal                             | 34.3 (74)           | 28.2 (164)                             | 55.4 (41)                               | 36.5 (27)  | 8.1 (6)    | 0        | 0       |
|                                    | Eye, ear, nose and throat                   | 19.0 (41)*          | 11.7 (68)                              | 85.4 (35)                               | 12.2 (5)   | 2.4 (1)    | 0        | 0       |
|                                    | Psychiatric                                 | 13.0 (28)*          | 23.0 (134)                             | 25.0 (7)                                | 57.1 (16)  | 17.9 (5)   | 0        | 0       |
|                                    | Respiratory                                 | 8.3 (18)            | 9.8 (57)                               | 55.6 (10)                               | 22.2 (4)   | 22.2 (4)   | 0        | 0       |
|                                    | Lower gastrointestinal                      | 6.0 (13)            | 5.0 (29)                               | 30.8 (4)                                | 53.8 (7)   | 15.4 (2)   | 0        | 0       |
| One or more domains<br>(n = 602)   | Musculoskeletal                             | 47.5 (286)*         | 40.9 (570)                             | 25.9 (74)                               | 40.2 (115) | 30.1 (86)  | 3.1 (9)  | 0.7 (2) |
|                                    | Psychiatric                                 | 45.5 (274)          | 47.2 (659)                             | 10.6 (29)                               | 47.8 (131) | 37.2 (102) | 4.0 (11) | 0.4 (1) |
|                                    | Respiratory                                 | 38.7 (233)*         | 33.4 (466)                             | 16.3 (38)                               | 42.5 (99)  | 36.9 (86)  | 3.4 (8)  | 0.9 (2) |
|                                    | Eye, ear, nose and throat                   | 24.9 (150)**        | 16.6 (231)                             | 42.0 (63)                               | 27.3 (41)  | 24.7 (37)  | 4.0 (6)  | 2.0 (3) |
|                                    | Endocrine                                   | 24.4 (147)**        | 13.3 (186)                             | 7.5 (11)                                | 34.0 (50)  | 46.9 (69)  | 8.8 (13) | 2.7 (4) |
| Two or more domains<br>(n = 386)   | Psychiatric + Respiratory                   | 39.6 (153)          | 35.9 (292)                             | 9.8 (15)                                | 47.7 (73)  | 38.6 (59)  | 3.3 (5)  | 0.7 (1) |
|                                    | Psychiatric + Musculoskeletal               | 35.2 (136)          | 31.0 (252)                             | 5.1 (7)                                 | 46.3 (63)  | 44.1 (60)  | 4.4 (6)  | 0       |
|                                    | Respiratory + Musculoskeletal               | 31.3 (121)*         | 22.9 (186)                             | 9.1 (11)                                | 42.1 (51)  | 43.8 (53)  | 4.1 (5)  | 0.8 (1) |
|                                    | Respiratory + Endocrine                     | 20.2 (78)**         | 7.7 (63)                               | 5.1 (4)                                 | 35.9 (28)  | 50.0 (39)  | 7.7 (6)  | 1.3 (1) |
|                                    | Psychiatric + Endocrine                     | 19.2 (74)**         | 10.2 (83)                              | 5.4 (4)                                 | 36.5 (27)  | 47.3 (35)  | 9.5 (7)  | 1.4 (1) |
| Three or more domains<br>(n = 254) | Psychiatric + Respiratory + Musculoskeletal | 35.8 (91)*          | 28.3 (133)                             | 5.5 (5)                                 | 44.0 (40)  | 47.3 (43)  | 3.3 (3)  | 0       |
|                                    | Psychiatric + Haematological + Endocrine    | 22.4 (57)**         | 10.2 (48)                              | 3.5 (2)                                 | 40.4 (23)  | 47.4 (27)  | 7.0 (4)  | 1.8 (1) |
|                                    | Respiratory + Musculoskeletal + Endocrine   | 18.9 (48)**         | 7.4 (35)                               | 2.1 (1)                                 | 31.3 (15)  | 60.4 (29)  | 6.3 (3)  | 0       |
|                                    | Vascular + Respiratory + Endocrine          | 18.5 (47)**         | 6.8 (32)                               | 0                                       | 27.7 (13)  | 63.8 (30)  | 6.4 (3)  | 2.1 (1) |
|                                    | Psychiatric + Vascular + Respiratory        | 18.1 (46)*          | 12.3 (58)                              | 2.2 (1)                                 | 28.3 (13)  | 65.2 (30)  | 2.2 (1)  | 2.2 (1) |

<sup>a</sup> For 1 domain only, denominator (n = 582), <sup>b</sup> For 1+ domains, denominator (n = 1395), <sup>c</sup> For 2+ domains, denominator (n = 813), <sup>d</sup> For 3+ domains, denominator (n = 470)

\* Chi square test significant at .05 level vs Non-Aboriginal

\*\* Chi square test significant at .001 level vs Non-Aboriginal

### Multimorbidity Severity Index

Overall, GLM analysis revealed a significantly greater severity of disease among the street health cohort. Controlling for age and gender, street health patients ( $M = 1.4$ ,  $SD = .91$ ) had significantly higher multimorbidity severity than mainstream patients ( $M = 1.1$ ,  $SD = .80$ ),  $p < 0.001$ .

A significantly greater proportion of the street health patients were represented in the moderate (34.1%, 883/2587, 95% confidence interval 32.3 to 35.9%),  $p < 0.001$ , and severe categories (4.9%, 126/2587, 95% CI 4.1 to 5.8%),  $p < 0.001$ , compared with mainstream patients (moderate: 21.0%, 961/4583, 95% CI 19.8 to 22.2%; severe: 1.2%, 53/4583, 95% CI, 0.9 to 1.5%). When multimorbidity severity was stratified by age (Figure 4), a greater proportion of street health patients were again represented in the moderate and severe categories across every age category.

Overall, 24.4% (632/2587) of street health patients compared to 10.1% (463/4583) of mainstream patients had at least one level 3 or level 4 score across domains,  $p < 0.001$ . For patients with multimorbidity, this was 44.2% (530/1199) for street health cohort vs 18.3% (420/2294) of mainstream patients,  $p < 0.001$ .

Figure 5 shows the frequency trends of number of domains with level 3 or 4 scores[20] for patients with multimorbidity across 2+ domains for both cohorts, revealing a more pronounced and earlier onset of increased disease burden in the 25-44 and 45-64 year age group for street health patients but especially Aboriginal patients.

For the street health cohort, Aboriginal patients scored marginally higher on the CIRS Severity Index ( $M = 1.39$ ,  $SD = 0.89$ ) compared with non-Aboriginal patients ( $M = 1.34$ ,  $SD = 0.91$ ), although this difference was not statistically significant,  $p = 0.610$ .

### Factors Associated with Multimorbidity

Logistic regression analyses using the occurrence of multimorbidity across 2+, 3+ and 5+ domains as the criterion variable showed multimorbidity to be significantly associated with male gender, increasing age and Indigenous status (Table 4). Indigenous status was the strongest predictor of multimorbidity in each model. Aboriginal patients had an 87% increase in the likelihood of displaying multimorbidity across 2+ domains compared with non-Aboriginals. Aboriginal patients were also twice as likely to show multimorbidity across 3+ domains and nearly three times more likely to show multimorbidity across 5+ domains.

**Table 4. Relation between socio-demographic characteristics and the prevalence of multimorbidity**

| Characteristic    | Odds ratio | 95% CI       |
|-------------------|------------|--------------|
| <b>2+ Domains</b> |            |              |
| Male*             | 1.44       | 1.22 to 1.70 |
| Age *             | 1.01       | 1.04 to 1.05 |
| Indigenous*       | 1.87       | 1.55 to 2.26 |
| <b>3+ Domains</b> |            |              |
| Male*             | 1.41       | 1.17 to 1.70 |
| Age*              | 1.04       | 1.04 to 1.05 |
| Indigenous*       | 2.17       | 2.17 to 2.66 |
| <b>5+ Domains</b> |            |              |
| Male*             | 1.26       | 0.96 to 1.67 |
| Age*              | 1.05       | 1.04 to 1.06 |
| Indigenous*       | 2.82       | 2.11 to 3.77 |

\*  $p < .001$ 

## DISCUSSION

Research on multimorbidity among street health populations is scarce with little data available on patterns, prevalence or disease severity among particular age or ethnic groups. Existing research has tended to focus on specific areas, such as homelessness and mental health,[27-29] with little attention on the cumulative and synergistic effects of multiple chronic conditions or a broader biopsychosocial approach to health care needs.[4,30] The prevalence of multimorbidity is higher in deprived as opposed to more affluent areas[3,31] with multiple physical diseases often co-existing among patients with mental illness.[4,31,32]

This is the first study to use 42 conditions affecting anatomical domains to estimate patterns and prevalence of multimorbidity among marginalised and homeless patients attending a designated, primary care-run, street-based outreach service. Like our earlier mainstream practices study,[24] we include an estimation of disease severity to enhance the overall picture of multimorbidity burden in this population.

Key findings from our study include that multimorbidity is significantly associated with male gender, increasing age and Indigenous status with the latter the strongest predictor of multimorbidity irrespective of whether 2+, 3+ or 5+ domains are used as the criterion variable.

### Strengths and limitations of the study

1  
2  
3 The strengths of this study include the large street health cohort size involving the total population  
4 seen over a six year period and the fact that we include a disease severity rating for each patient in  
5 addition to prevalence and patterns data recorded.  
6  
7

8  
9 A major difficulty we encountered was enumerating the homeless population mainly because it  
10 lacked a common definition.[33] The open access policy to the street health service could have had a  
11 diluting effect on the proportion of more traditional users of the service because of one-off  
12 opportunistic and convenience attendances. Among street health patients, 22.8% had no  
13 multimorbidity compared with 26.9% among mainstream patients.  
14  
15

16  
17  
18 In addition, whilst the street health population is based on data collected over a six year period, the  
19 comparator mainstream practice data was collected over six months.[24]  
20

### 21 **Prevalence and patterns**

22  
23  
24 Multimorbidity prevalence among the street health cohort was significantly higher than the age-sex  
25 adjusted prevalence for the mainstream cohort. The age breakdown across 2+ domains shows  
26 younger patients as much more vulnerable to having multiple chronic conditions with a 12% greater  
27 likelihood among 23 - 34 year old patients. This contrasts with findings from our earlier research  
28 where prevalence patterns progressively increased from the 25 – 44 year age group to the 45 – 64  
29 and 65 -74 year age groups.[24] The reason for multimorbidity peaking in the 25 - 44 year age group  
30 in the street health population could be explained by the premature deaths of these patients or the  
31 possibility that those surviving to older age start attending mainstream practices or become  
32 institutional residents.  
33  
34  
35  
36  
37  
38

39  
40 A key finding from our study is the willingness of Aboriginal patients to attend the street health  
41 service - 29.6% v. 1.6% to Australian primary care practices[34] – and that Aboriginal patients overall  
42 are significantly younger – 36.8% v. 18.9% under 25 years old - than non-Aboriginal patients. Due to  
43 a lack of data on Aboriginality amongst the mainstream practice, it was not possible to compare  
44 both cohorts. Among the street health population, Aboriginal patients have significantly higher rates  
45 of multimorbidity across all age groups and number of domains affected.  
46  
47  
48

49  
50 The high prevalence of psychiatric morbidity (46.7%) was not unexpected. The three most common  
51 domains - psychiatric, musculoskeletal (42.9%) and respiratory (35.0%) - are similar to mainstream  
52 except that psychiatry and musculoskeletal are juxtaposed.[24] These three domains remain most  
53 common even when 2+ or 3+ domains are examined and may act to facilitate or accelerate other  
54 morbidities resulting in premature ageing or progressive deterioration.  
55  
56  
57  
58  
59  
60

1  
2  
3 A notable feature of the street population was the high prevalence of chronic skin conditions (leg  
4 ulcers, slow to heal infections/lacerations and scabies) reflecting the reality of poor living  
5 circumstances and hygiene. Inclusion of these conditions as part of the  
6 musculoskeletal/integumental domain is likely to have increased the overall prevalence for this  
7 domain. The possibility that early onset of psychiatric illness may in turn contribute to a cascade of  
8 homelessness, lack of stable relationships and failure to achieve educational potential should be  
9 considered.  
10  
11  
12  
13

#### 14 **Disease severity**

15  
16  
17 Disease severity burden is of particular value in disadvantaged populations because the cumulative  
18 and synergistic nature of their multimorbidities impacts on their need for appropriate health  
19 services[30] while their socioeconomic circumstances renders their access to such services  
20 inequitable. American, [10] Canadian[9] and British[12,13] studies have all found much common  
21 ground with housing, mental illness, poor education and smoking common factors throughout.  
22 Complex interventions invariably do better when housing is integrated into the solution and the  
23 importance of social geography and family supports acknowledged.[7] There is no definitive answer  
24 but well integrated support networks built around primary care services would appear a logical way  
25 forward.  
26  
27  
28  
29  
30  
31  
32  
33

34  
35 We found the multimorbidity SI significantly higher for street health patients, more pronounced with  
36 'moderate' and 'severe' morbidity and persisting across all age categories. Given the large numbers  
37 in the two population cohorts, the relatively small but significant differences of 13% in the  
38 moderately severe and 4% in the severe disease severity index categories translate to a substantial  
39 number of patients. The impost in terms of service delivery could therefore be greater than is  
40 primarily evident. Taken together with the fact that the presence of multiple severe or moderately  
41 severe chronic conditions is not compatible with long-term survival or management in the primary  
42 care setting especially amongst a marginalised, street health population, it is likely to impact directly  
43 on Emergency Department visits and hospital admissions.  
44  
45  
46  
47  
48  
49

50  
51 After age-sex adjustment, multimorbidity prevalence is significantly higher among the street health  
52 cohort. Where disease exists, it tends to be of significantly greater severity as reflected by the more  
53 pronounced domain level 3 and level 4 scores. This supports earlier research by Starfield and  
54 Kinder[35] that morbidities are not randomly distributed amongst populations. Instead, those with  
55 the highest vulnerability to illness have a greater disadvantage because the clustering of morbidities  
56  
57  
58  
59  
60

1  
2  
3 in these sub-populations diminishes their quality of life.[3] Multimorbidity in such circumstances  
4 impacts negatively not just on their functioning status[36,37] but also causes increased and poorly  
5 co-ordinated use of health services,[5] increased direct and indirect healthcare costs[6] and  
6 heightens the risk of premature death.[38,39]  
7  
8  
9

## 10 **Conclusion**

11  
12 Our study reports on the prevalence, patterns and disease severity of multimorbidity among a  
13 marginalised population attending a primary care-led, street health clinic in Western Australia.  
14 Overall, the probability of early onset (23-34 years) multimorbidity is higher in the street health  
15 cohort compared with mainstream practice but not in patients aged over 45 years with psychiatric,  
16 musculoskeletal and respiratory the commonest domains affected. For Aboriginal patients, the  
17 prevalence of multimorbidity is higher across all ages but especially if aged < 25 years.  
18  
19

20  
21 Disease severity is significantly higher in the street health population, especially Aboriginal patients,  
22 with greater 'moderate' and 'severe' morbidity and persists across all age categories. Attendance  
23 patterns for Aboriginal patients suggest they are more likely to engage with street-based, outreach  
24 service than mainstream practice. Reasons for this increased engagement warrant further  
25 investigation.  
26  
27  
28  
29  
30

31  
32 Our findings have implications on the design and delivery of health care services to meet the  
33 increasing challenge of multimorbidity[4,40] in disadvantaged and Indigenous populations.  
34 Traditional approaches to service delivery fail to meet the needs of this population.[12] Such  
35 services need more complex interventions but are unlikely to receive appropriate health services  
36 expenditure and compare unfavourably with that offered to mainstream patients. A more integrated  
37 outreach approach involving better housing, psychiatric, education and social supports would seem  
38 logical to address their needs. Longer term prospective studies including an economic analysis  
39 component would be helpful.  
40  
41  
42  
43  
44  
45

## 46 **WHAT THIS PAPER ADDS:**

### 47 **What is already known on this subject**

48  
49 Marginalised and homeless people have more chronic diseases, high mortality rates, high direct and  
50 indirect health care costs and generally make poor utilisation of available health services. Mental  
51 illness, drug and alcohol abuse are especially common in homeless people. The Inverse Care Law[11]  
52 ensures that those in greatest need generally receive the least treatment.  
53  
54  
55  
56  
57

### 58 **What this study adds**

1  
2  
3 Our study shows multimorbidity amongst street health patients is common, more severe and exists  
4 across all anatomical domains with younger patients (23-34 year olds) and Aboriginal patients  
5 especially vulnerable. Among the street health population, multimorbidity is significantly associated  
6 with male gender, increasing age and Indigenous status. Aboriginal patients comprise 29.6% of the  
7 street health cohort which compares favourably with the 1.6% attending mainstream Australian  
8 practices and offers hope for greater engagement of basic health services into the future.  
9  
10  
11  
12  
13  
14  
15  
16  
17  
18  
19  
20  
21  
22  
23  
24  
25  
26  
27  
28  
29  
30  
31  
32  
33  
34  
35  
36  
37  
38  
39  
40  
41  
42  
43  
44  
45  
46  
47  
48  
49  
50  
51  
52  
53  
54  
55  
56  
57  
58  
59  
60

For peer review only

**ACKNOWLEDGEMENTS**

We acknowledge the assistance of the staff at the Freo Street Doctor clinic, Fremantle Medicare Local and the medical practice involved in the study. We acknowledge the assistance of Drs Maeve Kiely and Cam Phan with data acquisition. Research support was received from The Australian Commonwealth Government Primary Health Care Research Evaluation and Development (PHCRED) Strategy Phase 2. The General Practice and Primary Health Care Research Unit is partly funded under the Collaborative Research Network (CRN) Program Grant from the Australian Government Department of Education to the University of Notre Dame Australia. We also acknowledge financial support from J Galvin, W Cunningham, L Ryan and A Neale.

**FUNDING**

Research support was received from The Australian Commonwealth Government Primary Health Care Research Evaluation and Development (PHCRED) Strategy Phase 2. The General Practice and Primary Health Care Research Unit is partly funded under the Collaborative Research Network (CRN) Program Grant from the Australian Government Department of Education to the University of Notre Dame Australia. We also acknowledge financial support from J Galvin, W Cunningham, L Ryan and A Neale.

**CONFLICT DISCLOSURE**

All authors have completed the ICMJE uniform disclosure form at [www.icmje.org/coi\\_disclosure.pdf](http://www.icmje.org/coi_disclosure.pdf) and declare: TB, DAR, LT and RGM have received research grant funding; DAR has received support from research donations; no other relationships or activities that could appear to have influenced the submitted work.

**DATA SHARING STATEMENT**

No additional data are available

**CONTRIBUTORS**

TB and DAR made substantial contributions to the conception and design of the work as well as the acquisition, analysis and interpretation of data for the study.

LT and MB made substantial contributions to the analysis and interpretation of data.

RGM made substantial contributions to the acquisition of data.

TB, DAR and LT were responsible for drafting the manuscript and all authors revised it critically for important intellectual content, final approval of the version to be published and agree to be



1  
2  
3  
4  
5  
6  
7  
8  
9  
10  
11  
12  
13  
14  
15  
16  
17  
18  
19  
20  
21  
22  
23  
24  
25  
26  
27  
28  
29  
30  
31  
32  
33  
34  
35  
36  
37  
38  
39  
40  
41  
42  
43  
44  
45  
46  
47  
48  
49  
50  
51  
52  
53  
54  
55  
56  
57  
58  
59  
60

accountable for all aspects of the work in ensuring that questions related to the accuracy or integrity of any part of the work are appropriately investigated and resolved.

For peer review only

**REFERENCES**

1. Barnett K, Mercer SW, Norbury M, et al. Epidemiology of multimorbidity and implications for health care, research, and medical education: a cross-sectional study. *Lancet* 2012;**380**:37-43 doi: 10.016/S0140-6736(12)60240-2.
2. Fortin M, Lapointe L, Hudon C, et al. Multimorbidity and quality of life in primary care: a systematic review. *Health and Quality of Life Outcomes* 2004;**2**:51.
3. Mercer S, Watt G. The Inverse Care Law: Clinical primary care encounters in deprived and affluent areas of Scotland. *Ann Fam Med* 2007;**5**:503-10.
4. Payne R, Gray A, Guthrie B, et al. The effect of physical multimorbidity, mental health conditions and socioeconomic deprivation on unplanned admissions to hospital: a retrospective cohort study. *CMAJ* 2013;**185**(5):E221-8 doi: 10.1503/cmaj.121349.
5. Salisbury C, Johnson L, Purdy S, et al. Epidemiology and impact of Multimorbidity in primary care: a retrospective cohort study. *Br J Gen Pract* 2011;**61**:18-24.
6. Hoffman C, Rice D, Hai-Yen S. Persons with chronic conditions - their prevalence and costs. *JAMA* 1996;**276**:1473-79.
7. Sadowski L, Kee R, VanderWeele T, et al. Effect of a housing and case management program on emergency department visits and hospitalizations among chronically ill homeless adults. *JAMA* 2009;**301**:1771-8.
8. Glynn L, Valderas JM, Healy P, et al. The prevalence of Multimorbidity in primary care and its effect on health care utilisation and cost. *Fam Pract* 2011(28):516-23 doi: 10.1093/fampra/cmr013.
9. Hwang S, Wilkins R, Tjepkema M, et al. Mortality among residents of shelters, rooming houses, and hotels in Canada: 11 year follow-up study. *BMJ* 2009;**339**:b4036 doi: 10.1136/bmj.b4036.
10. Lantz P, House J, Lepkowski J, et al. Socioeconomic factors, health behaviors, and mortality: results from a nationally representative prospective study of US adults. *JAMA* 1998;**279**:1703-08.
11. Tudor-Hart J. The inverse care law. *Lancet* 1971;**1**:405-12.
12. Fazel S, Khosla V, Doll H, et al. The prevalence of mental disorders among the homeless in western countries: systematic review and meta-regression analysis. *PLoS Medicine* 2008;**5**(12):e225 doi: 10.1371/journal.pmed.0050225
13. Shaw M, Dorling D, Brimblecombe N. Life chances in Britain by housing wealth and for the homeless and vulnerably housed. *Environment and Planning A* 1999;**31**:2239-48.
14. Riley A, Harding G, Underwood M, et al. Homelessness: a problem for primary care? . *Br J Gen Pract* 2003;**55**:474-79.

- 1  
2  
3 15. Gunn JM, Ayton DR, Densley K, et al. The association between chronic illness, multimorbidity and  
4 depressive symptoms in an Australian primary care cohort. *Social Psychiatry and Psychiatric*  
5 *Epidemiology* 2012;**47**:175-84.
- 6  
7 16. Bloch G, Rozmovits L, Giambone B. Barriers to primary care responsiveness to poverty as a risk  
8 factor for health. *BMC Family Practice* 2011;**12**:62 doi: 10.1186/1471-2296-12-62.
- 9  
10 17. Gelberg L, Gallagher T, Andersen R, et al. Competing priorities as a barrier to medical care among  
11 homeless adults in Los Angeles. *Am J Public Health* 1997;**87**:217-20.
- 12  
13 18. Jeal N, Salisbury C. Self reported experiences of health services among female street-based  
14 prostitutes: a cross sectional survey. *Br J Gen Pract* 2004;**54**:215-19.
- 15  
16 19. Cummings M, Kang M. Youth health services - improving access to primary care. *Australian*  
17 *Family Physician* 2012;**41**:339-41.
- 18  
19 20. Miller MD, Paradis CF, Houck PR, et al. Rating Chronic Medical Illness Burden in Geropsychiatric  
20 Practice and Research: Application of the Cumulative Illness Rating Scale *Psychiatric Res*  
21 *1992*;**41**:237-48 doi: [http://dx.doi.org/10.1016/0165-1781\(92\)90005-N](http://dx.doi.org/10.1016/0165-1781(92)90005-N).
- 22  
23 21. Murray S, Skull S. Hurdles to health: immigrant and refugee health care in Australia. . *Aus Health*  
24 *Rev* 2005;**29**:25-29.
- 25  
26 22. Parslow R, Jorm A, Christensen H, et al. Factors associated with young adults obtaining general  
27 practitioner services. . *Aus Health Rev* 2002;;**25**:109-17.
- 28  
29 23. Shadmi E. Multimorbidity and equity in health. *International J for Equity in Health* 2013;**12**:59  
30 doi: doi:10.1186/1475-9276-12-59.
- 31  
32 24. Brett T, Arnold-Reed D, Popescu A, et al. Multimorbidity in patients attending 2 Australian  
33 primary care practices. *Ann Fam Med* 2013;**11**:535-42 doi: 10.1370/afm.1570.
- 34  
35 25. Hudon C, Fortin M, Soubhi H. Abbreviated guidelines for scoring Cumulative Illness Rating Scale  
36 (CIRS) in family practice. *J Clin Epidemiol* 2007;**60**:212.
- 37  
38 26. O'Halloran J, Miller G, Britt H. Defining chronic conditions for primary care with ICPC-2. *Fam*  
39 *Pract* 2004;**21**:381-86.
- 40  
41 27. Hermann H, Evert H, Harvey C, et al. Disability and service use among homeless people living  
42 with psychotic disorders. *Aust NZ J Psychiatry* 2004;**38**:965-74.
- 43  
44 28. Teesson M, Hodder T, Buhrich N. Psychiatric disorders in homeless men and women in inner  
45 Sydney. *Aust NZ J Psychiatry* 2004;**38**:162-68.
- 46  
47 29. Trevena L, Nutbeam D, Simpson J. Asking the right questions of disadvantaged and homeless  
48 communities: the role of housing, patterns of illness and reporting behaviours in the  
49 measurement of health status. *Aust NZ J Public Health* 2001;**25**:298-304.
- 50  
51  
52  
53  
54  
55  
56  
57  
58  
59  
60

- 1  
2  
3 30. Bayliss E, Ellis J, Steiner J. Seniors' self-reported multimorbidity captured biopsychosocial factors  
4 not incorporated into two other data-based morbidity measures. *J Clin Epidemiol*  
5 2009;**62**:550-57.  
6  
7  
8 31. Orueta J, Nuno-Solinis R, Garcia-Alvarez A, et al. Prevalance of multimorbidity according to the  
9 deprivation level among the elderly in the Basque Country. *BMC Public Health* 2013;**13**:918.  
10  
11 32. Andrade L, Bensenor I, Viana M, et al. Clustering of psychiatric and somatic illnesses in the  
12 general population: multimorbidity and socioeconomic correlates. *Braz J Med* 2010;**43**:483-  
13 91.  
14  
15 33. Fitzpatrick-Lewis D, Ganann R, Krisnaratne S, et al. Effectiveness of interventions to improve the  
16 health and housing status of homeless people: a rapid systematic review. *BMC Public Health*  
17 2011;**11**:638.  
18  
19 34. Britt H, Miller G, Charles J, et al. A decade of Australian general practice activity 2002-03 to 2011-  
20 12. General practice series. Sydney: Sydney University Press, 2012.  
21  
22 35. Starfield B, Kinder K. Multimorbidity and its measurement. *Health Policy* 2011;**103**:3-8.  
23  
24 36. Bayliss E, Bayliss M, Ware J, et al. Predicting declines in physical function in persons with multiple  
25 chronic conditions: what we can learn from the medical problem list. *Health and Quality of*  
26 *Life Outcomes* 2004;**2**:47-51.  
27  
28 37. Lawson K, Mercer S, Wyke S, et al. Double trouble: the impact of Multimorbidity and deprivation  
29 on preference-weighted health related quality of life - a cross-sectional analysis of the  
30 Scottish Health Survey. *International J for Equity in Health* 2013;**12**:12: 67 doi:  
31 10.1186/1475-9276-12-67.  
32  
33 38. Gijzen R, Hoeymans N, Schellevis F, et al. Causes and consequences of comorbidity: A review. *J*  
34 *Clin Epidemiol* 2001;**54**:661-74.  
35  
36 39. Yancik R, Wesley M, Ries L, et al. Comorbidity and age as predictors of risk for early mortality of  
37 male and female colon carcinoma patients: a population based study. *Cancer* 1998;**82**:2123-  
38 34.  
39  
40 40. Tinetti M, Fried T, Boyd C. Designing health care for the most common chronic condition -  
41 multimorbidity. *JAMA* 2012:2493-94.  
42  
43  
44  
45  
46  
47  
48  
49  
50  
51  
52  
53  
54  
55  
56  
57  
58  
59  
60

**FIGURE LEGENDS**

**Figure 1.** Prevalence of multimorbidity within age groups with 95% confidence intervals

**Figure 2.** Probability of multimorbidity (2+ domains) as a function of age

**Figure 3.** Prevalence of multimorbidity in Street Health sample stratified by age and Indigenous status with 95% confidence intervals

**Figure 4.** Severity Index distribution within age groups

**Figure 5.** Frequency trends of number of domains with level 3 or 4 scores

For peer review only

1  
2  
3  
4  
5  
6  
7  
8  
9  
10  
11  
12  
13  
14  
15  
16  
17  
18  
19  
20  
21  
22  
23  
24  
25  
26  
27  
28  
29  
30  
31  
32  
33  
34  
35  
36  
37  
38  
39  
40  
41  
42  
43  
44  
45  
46  
47  
48  
49  
50  
51  
52  
53  
54  
55  
56  
57  
58  
59  
60

**TITLE:** Multimorbidity in a marginalised, street-health Australian population – a retrospective cohort study

**CORRESPONDING AUTHOR:**

Prof Tom Brett  
Director  
General Practice and Primary Health Care Research  
School of Medicine  
The University of Notre Dame Australia  
19 Mouat Street, PO Box 1225  
Fremantle, Western Australia 6959

Tel: +61 8 9433 0571  
Email: [tom.brett@nd.edu.au](mailto:tom.brett@nd.edu.au)

**CO-AUTHORS:**

1. Associate Professor Diane E Arnold-Reed  
Research and Development Co-ordinator  
General Practice and Primary Health Care Research  
School of Medicine  
The University of Notre Dame Australia  
19 Mouat Street, PO Box 1225  
Fremantle, Western Australia 6959  
  
[and](#)  
[Centre for Health Services Research, School of Population Health, University of Western Australia, 35 Stirling Highway, Crawley Western Australia 6009](#)
2. Dr Lakkhina Troeung  
Biostatistical Support Officer  
General Practice and Primary Health Care Research  
School of Medicine  
The University of Notre Dame Australia
3. Professor Max K Bulsara  
Chair in Biostatistics  
Institute for Health Research  
The University of Notre Dame Australia  
19 Mouat Street, PO Box 1225  
Fremantle, Western Australia 6959
4. Dr Annalisse Williams  
Junior Medical Officer and GP Registrar  
Illawarra Shoalhaven Local Health District  
New South Wales, Australia
5. Professor Robert G Moorhead  
Adjunct Professor  
School of Medicine  
The University of Notre Dame Australia  
19 Mouat Street, PO Box 1225  
Fremantle, Western Australia 6959

**Word count** (excluding title page, abstract, references, figures and tables): **3,829**

## ABSTRACT

**Objectives:** ~~To examine the d~~Demographic and presentation profile of patients using an innovative mobile outreach clinic ~~and compare d this service with patients attending~~ mainstream practice.

**Design:** Retrospective cohort study.

**Setting:** ~~Two p~~Primary care ~~clinics in Western Australia:~~ mobile street health clinic and mainstream practice ~~in Western Australia.~~

**Participants:** 2587 street health ~~patients~~ and 4583 mainstream patients.

**Main outcome measures:** Prevalence and patterns of chronic diseases in anatomical domains across entire age spectrum of patients and disease severity burden using Cumulative Illness Rating Scale (CIRS).

**Results:** ~~The crude~~Lower prevalence of ~~Multimorbidity~~ multimorbidity (2+ CIRS domains) ~~prevalence was lower in the~~ street health (46.43%, 1199/2587) than mainstream ~~sample~~ (50.1%, 2294/4583),  $p=0.003$  ~~when comparing crude estimates but significantly higher when comparing with .~~ However, ~~after direct age-sex adjusted of the mainstream prevalence rate estimate (43.1%, 2000/4583), multimorbidity prevalence was significantly higher in the street health than mainstream sample,~~  $p=0.011$ .

~~Younger street health patients (14-43 years) showed greater~~ Higher multimorbidity in street health patients <45 years (37.7%, 615/1649) compared to ~~than mainstream patients~~ (34.3%, 1017/2961),  $p=0.045$  but ~~Prevalence is significantly lower if 45+ years in street health (62.3%, 584/938 vs 78.7%, 1277/1622,  $p<0.001$ ) if aged 45+ years compared to mainstream patients (78.7%, 1277/1622),~~  $p<0.001$ .

~~but s~~Street health patients ~~also~~ showed significantly greater disease severity. Controlling for age and gender, mean CIRS Severity Index score for street health (M = 1.4, SD = 0.91) ~~was~~ significantly higher than mainstream patients (M = 1.1, SD = 0.80),  $p<0.001$ . Furthermore, 44.2% (530/1199) of street health patients had at least one level 3 or 4 score across domains compared to 18.3% (420/2294) of mainstream patients,  $p<0.001$ .

1  
2  
3 ~~Younger street health patients (14-43 years) showed greater multimorbidity than mainstream~~  
4 ~~patients. Prevalence is significantly lower in street health (62.3%, 584/938) if aged 45+ years~~  
5 ~~compared to mainstream patients (78.7%, 1277/1622),  $p < 0.001$ .~~  
6  
7

8  
9 Aboriginal patients were 29.6% (766/2587) of street health population with 50.4% (386/766) having  
10 multimorbidity ~~compared with~~ 44.6% (813/1821) for non-Aboriginals,  $p=0.007$ . ~~There was a~~  
11 ~~comprehensive data on Indigenous status in the mainstream cohort available for comparison.~~  
12  
13

14 Musculoskeletal, respiratory and psychiatric domains were most commonly affected with  
15 multimorbidity significantly associated with male gender, increasing age and Indigenous status.  
16  
17

18 **Conclusions:** ~~Age-sex adjusted Multimorbidity multimorbidity~~ prevalence ~~and disease severity is~~  
19 ~~lower higher~~ in street health cohort ~~but with greater severity~~. Early onset (23-34 years-old)  
20 multimorbidity is higher in street health cohort but prevalence is lower in 45+ years than  
21 mainstream patients. Multimorbidity prevalence is higher for Aboriginal patients of all ages.  
22  
23  
24  
25  
26  
27  
28  
29  
30  
31  
32  
33  
34  
35  
36  
37  
38  
39  
40  
41  
42  
43  
44  
45  
46  
47  
48  
49  
50  
51  
52  
53  
54  
55  
56  
57  
58  
59  
60



**ARTICLE SUMMARY****Strengths and limitations of the study**

- New information on a vulnerable, street-based population accessing an accredited, mobile outreach medical service.
- The large cohort size (n=2587) involving a total street based population seen over a six year period compared with 4583 mainstream patients from similar catchment area.
- Includes a severity rating for each patient in addition to prevalence and patterns of chronic diseases recorded.
- The open access policy to the street health service could have diluted the proportion of more traditional users of the service because of one-off opportunistic and convenience attendances.
- The street health population is based on data collected over a six year period while the comparator mainstream practice data was collected over six months.

**KEY WORDS**

Multimorbidity, chronic disease, primary healthcare, general practice, severity of illness index

## INTRODUCTION

The combination of multiple chronic diseases (multimorbidity) and poor access to primary health care results in serious social, economic and health consequences[1-5] as well as providing considerable challenges for service providers. Marginalised and homeless people have more chronic diseases, high mortality rates, high direct and indirect healthcare costs[6,7] and poor utilisation of primary care health services.[1,8-11] Alcohol and drug related deaths, smoking related diseases, ischemic heart disease and respiratory diseases are especially common.[9] A systematic review[12] found homeless people in Western countries had much greater drug and alcohol dependence compared to age-matched populations while psychotic illnesses and personality disorders were also more common. Canadian homeless and marginally housed people have 32% probability of survival to 75 years among men and 60% among women with housing a key marker for socioeconomic disadvantage.[9] Death rates among 'rough sleepers' in the United Kingdom are 25 times that of the housed population.[13]

Risk factors influencing access to health services include lack of suitable housing,[9,14] mental health problems,[12,15] poor education, unemployment and lack of regular income.[16,17] Social marginalisation impacts negatively on healthcare utilisation including fear of stigmatisation on visiting mainstream practices and waiting rooms.[18] People from Indigenous, non-English speaking and refugee backgrounds often avoid contact with a regular doctor and only seek help when a crisis develops.[19-21] Such individuals have poorer health outcomes[22] exhibiting patterns of chronic, multimorbid disease at a younger age compared to the general population.[23] In Scotland, Mercer[3] found an increased burden of ill-health and multimorbidity in deprived areas resulting in greater demands on primary health care leading to reduced access, less patient-doctor time and more GP stress but less patient enablement.

The "Freo Street Doctor"is an accredited, street-based mobile health clinic established in 2005 to help meet the needs of marginalised and homeless patients unable or unwilling to access mainstream primary health care. It operates in from a number of designated areas within Fremantle and surrounding suburbs in Western Australia. Whilst the target population is mainly marginalised and disadvantaged patients, access to the service is unrestricted with electronic records kept for all attendees. The clinic team consists of general practitioners, nurses, outreach workers, Indigenous health workers and social workers. Our study aims to examine the demographic profile of patients using this street health service compared to mainstream primary care practices, the range and severity of morbidities/chronic diseases across anatomical domains and compares these parameters for Aboriginal and non-Aboriginal patients.

## METHOD

### Study Setting

The entire patient cohort attending the “Freo Street Doctor” service over the period 1 January 2006 to 31 December 2011 was examined. ~~Patient data was entered by reception, medical and nursing staff into standard practice software and stored centrally at Fremantle Medicare Local offices. Data for the study were using data~~ extracted from ~~electronic-the central~~ medical records ~~ss stored at the Fremantle Medicare Local. Data from the street health patient cohort were and~~ compared with ~~the total patient population a subset of patient data from~~ attending a mainstream general practice clinic[24] servicing the same catchment area over the period 1 July to 31 December 2008.

### Data Extraction

Data extraction was undertaken by two GPs and two medical students, all with similar training and prior experience in the use and application of the Cumulative Illness Rating Scale (CIRS). The scoring of chronic conditions using the validated CIRS has been described in detail previously[20,25] as has the Severity Index (SI) classification.[24]

~~Briefly, records were reviewed and 42 conditions were scored according to CIRS guidelines: 0 = no problems, 1 = mild problems, 2 = moderate morbidity, 3 = severe chronic problems, 4 = extremely severe functional impairment. Conditions were categorised into 14 anatomical domains. Maximum scores for each domain were summed added to yield a total score ranging from 0 to 56 for each patient. The total score was then divided by the number of domains with morbidities to generate a CIRS score for each patient ranging from 0 to 4. Severity ratings were defined as 0 = none/low, 1 = mild, 2 = moderate and 3/4 = severe.~~

The street health dataset contained a large number of one-off consultations. Some attendees had no fixed abode with many using drop-in centres as proxy addresses. ~~As far as possible, data extractors took precautions to guard against double counting. There may have been some limited cross over between street and mainstream practices but, in general, patients attending one service tended to continue doing so.~~

~~Because the study population was considered at higher risk than same age patients attending mainstream practices and clinical information was limited in some instances, we included patients with conditions that appeared to be ongoing (for example, skin infections post lacerations or scabies infestation). We did so to reflect the types of problems presenting to the Street health service and~~

~~the fact that such conditions were often of much greater magnitude in disadvantaged, marginalised populations such as the homeless and drug users.~~

### Operational Definition

Our operational definition of multimorbidity was the co-occurrence of conditions across two or more (2+) domains in individual patients.[26] After data extraction was completed, a random sample of 30 patients across the entire age spectrum for both clinics was re-assessed to measure consistency among raters.

### Data Analysis

Data analysis was conducted using SPSS 22 (IBM Corporation). All statistical analyses were tested against an alpha level of 0.05 (two-tailed).

Sample characteristics are expressed as means (standard deviation of the mean) for continuous variables and as frequencies (percentages) for categorical variables. Independent samples t-tests and Chi-Square tests were used to examine any demographic differences between the two samples.

The crude prevalence of multimorbidity was calculated as the number of patients with long-term conditions in 2+ morbidity domains as a proportion of the total sample. Given significant differences in age-sex distribution between the two samples, age-sex adjusted prevalence was calculated for the mainstream sample using direct. Prevalence measures were adjusted for age and sex standardisation to the street health cohort. Chi-square tests were used to examine prevalence differences between the two cohorts. Patterns of multimorbidity are expressed as frequencies.

In addition, to examine age of onset of multimorbidity, we modelled the probability of multimorbidity as a function of age. First, a logistic regression analysis was run with the presence of multimorbidity as the dependent variable, and clinic, age, and age squared (given the non-linear relationship between age and multimorbidity) as independent variables (IV). The regression coefficients ( $\beta$ ) for each IV were then used to model the probability of multimorbidity as a function of age in each sample.

Multimorbidity severity was examined using the CIRS SI score as well as distribution of patients within each CIRS severity category. SI categories were defined as 0 (none), 1 (mild), 2 (moderate) and 3 or 4 (severe). General linear modelling (GLM) was used to examine differences in

1  
2  
3 multimorbidity severity between the two samples, controlling for age and gender. We also counted  
4 and compared the number of patients with at least one level 3 or 4 score across CIRS domains,[20]  
5 as well as the number of domains with a level 3 or 4 score for each patient as additional indicators of  
6 disease severity.  
7  
8

9  
10  
11 Subgroup analysis was conducted to examine the prevalence and severity of multimorbidity in  
12 Indigenous and non-Indigenous patients in the street health cohort. There was no data on  
13 Indigenous status in the mainstream cohort for comparison.  
14

15  
16  
17 We also examined the relationship between demographic characteristics and the presence of  
18 multimorbidity across 2, 3, and 5 domains using a series of logistic regression analyses.  
19  
20

21  
22 Inter-rater reliability between data extractors was assessed using Cronbach's alpha.  
23  
24

#### 25 **Ethics**

26  
27 Ethics approval for the study was obtained from The University of Notre Dame Australia Human  
28 Research Ethics Committee.  
29  
30  
31  
32  
33  
34  
35  
36  
37  
38  
39  
40  
41  
42  
43  
44  
45  
46  
47  
48  
49  
50  
51  
52  
53  
54  
55  
56  
57  
58  
59  
60

## RESULTS

## Patient Characteristics

A total of 2587 patients attended the street health service and 4583 attended mainstream practice over the study periods. The age and gender distribution of patients at both clinics are shown in Table 1. The mean age of street health patients was 37.8 years (SD = 18.7) compared with 36.2 (SD = 21.1) for the mainstream practice. There were no significant differences in age between the two cohorts,  $p=0.055$ , but a significant difference in gender distribution was observed. The majority of the street health patients were male (57.3%, 1482/2587) while the majority of patients attending mainstream practice were female (60.7%, 2783/4583),  $p<0.001$ .

Table 1. Age and Gender Distribution for Study Population

|                              | Fremantle Street Doctor       |                                 |                                      | Mainstream practice<br>( <i>n</i> = 4583) |
|------------------------------|-------------------------------|---------------------------------|--------------------------------------|-------------------------------------------|
|                              | Overall<br>( <i>n</i> = 2587) | Aboriginal<br>( <i>n</i> = 766) | Non-Aboriginal<br>( <i>n</i> = 1821) |                                           |
| Sex, % ( <i>n</i> )          |                               |                                 |                                      |                                           |
| Male                         | 57.3 (1482)                   | 50.3 (385)                      | 60.2 (1097)                          | 39.3 (1800)                               |
| Female                       | 42.7 (1105)                   | 49.7 (381)                      | 39.8 (724)                           | 60.7 (2783)                               |
| Age, mean (SD) [range]       |                               |                                 |                                      |                                           |
| Overall                      | 37.8 (18.7)<br>[0 to 103]     | 32.09 (17.9)<br>[0 to 81]       | 40.19 (18.5)<br>[0 to 103]           | 36.18 (21.1)<br>[0 to 98]                 |
| Male                         | 39.1 (18.5)<br>[0 to 103]     | 31.8 (18.1)<br>[1 to 81]        | 41.6 (17.9)<br>[0 to 103]            | 35.1 (22.3)<br>[0 to 92]                  |
| Female                       | 36.1 (18.7)<br>[0 to 90]      | 32.3 (17.7)<br>[0 to 75]        | 38.0 (18.9)<br>[0 to 90]             | 36.9 (20.3)<br>[0 to 98]                  |
| Age Category, % ( <i>n</i> ) |                               |                                 |                                      |                                           |
| < 25                         | 24.2 (626)                    | 36.8 (282)                      | 18.9 (344)                           | 28.9 (1326)                               |
| 25 to 44                     | 39.5 (1023)                   | 35.8 (274)                      | 41.1 (749)                           | 35.7 (1635)                               |
| 45 to 64                     | 28.3 (732)                    | 24.4 (187)                      | 29.9 (545)                           | 27.1 (1243)                               |
| 65 to 74                     | 5.3 (136)                     | 2.3 (18)                        | 6.5 (118)                            | 4.6 (211)                                 |
| 75+                          | 2.7 (70)                      | 0.7 (5)                         | 3.6 (65)                             | 3.7 (168)                                 |

Aboriginal patients were 29.6% (766/2587) of the street health sample. On average, Aboriginal patients were significantly younger than non-Aboriginal patients, with 36.8% (282/766) under the age of 25 compared with only 18.9% (344/1821) of non-Aboriginals,  $p<0.001$ . The majority of non-Aboriginal patients were male (60.2%, 1097/1821) while there was a more even gender distribution for Aboriginal patients attending the street health service (male 50.3%, 385/766),  $p<0.001$ .

## Inter-rater Reliability

1  
2  
3 Inter-rater reliability between data extractors was tested on CIRS scores and number of domains  
4 with morbidities for 30 randomly selected patients from each of the two cohorts. For the street  
5 health cohort, the intraclass correlation coefficient (ICC) was 0.94 (95% confidence interval 0.89 to  
6 0.97) for number of domains with morbidities and 0.96 (95% CI 0.93 to 0.98) for total CIRS scores  
7 indicating high inter-rater reliability. For the mainstream practice sample, the ICC was 0.98 (95% CI  
8 0.97 to 0.99) for number of domains with morbidities and 0.98 (95% CI 0.97 to 0.99) for CIRS scores.  
9  
10  
11  
12

### 13 14 **Prevalence of Multimorbidity**

15 ~~Overall, the crude prevalence of multimorbidity was lower in the street health sample. Overall, the~~  
16 ~~crude prevalence of multimorbidity was lower in the street health sample.~~ Multimorbidity, based on  
17 the presence of conditions affecting 2+ domains, was present in 46.3% (1199/2587, 95% confidence  
18 interval 44.4 to 48.3%) of street health patients, compared with 50.1% (2294/4583, 95% CI 48.6 to  
19 51.5%) of the mainstream sample,  $p=0.003$ . A total of 28.0% (724/2587) of the street health cohort  
20 had multimorbidity in 3+ domains compared with 31.9% (1464/4583) of mainstream patients,  
21  $p<0.001$ . Across 5+ domains, 10% (259/2587) of street health patients showed multimorbidity  
22 compared with 12.8% (587/4583) of the mainstream sample,  $p<0.001$ .  
23  
24  
25  
26  
27  
28  
29

30 ~~However, after adjusting for sex and age differences, the adjusted prevalence of multimorbidity~~  
31 ~~across 2+ domains for the mainstream sample (43.1%, 2000/4583) was significantly lower than in~~  
32 ~~the street health sample (46.3%),  $p<0.001$ .~~  
33  
34  
35  
36

37 Figure 1 shows the crude prevalence of multimorbidity across 2+ domains for both samples across  
38 age groups. The prevalence of multimorbidity among young street health patients aged < 45 years  
39 (37.7%, 615/1649) was significantly higher than in the mainstream sample (34.3%, 1017/2961),  
40  $p=0.045$ . ~~However, m~~Multimorbidity prevalence was significantly lower in the street health sample  
41 for patients 45+ years (62.3% [584/938] vs 78.7% [1277/1622], respectively),  $p<0.001$ .  
42  
43  
44  
45

46 ~~However, a~~After direct age-sex adjustment of the mainstream prevalence rate, the prevalence of  
47 multimorbidity was significantly higher in the street health (46.3%, 1199/2587) than mainstream  
48 sample (43.1%, 2000/4583),  $p=0.011$ .  
49  
50  
51  
52

53 Age of onset of multimorbidity was different for the two populations (Figure 2). For street health  
54 patients, the probability of multimorbidity peaked between 61 and 67 years,  $P(E_{\text{STREET HEALTH}})=0.78$ ,  
55 and then decreased. For mainstream patients, the probability of multimorbidity increased with age,  
56  
57  
58  
59  
60

1  
2  
3 with the greatest probability of multimorbidity observed for individuals aged over 70 years,  $P$   
4 ( $E_{\text{MAINSTREAM}}$ )= 0.99. Between the ages of 14 and 43, the probability of multimorbidity was higher for  
5 street health patients,  $P$  ( $E_{\text{STREET HEALTH}}$ ) = 0.26 to 0.71 vs.  $P$  ( $E_{\text{MAINSTREAM}}$ ) = 0.24 to 0.69, suggesting that  
6 younger street health patients are particularly vulnerable to multimorbidity. The greatest difference  
7 was observed between the ages of 23 and 34,  $P$  ( $E_{\text{STREET HEALTH}}$ ) = 0.43 to 0.62 vs.  $P$  ( $E_{\text{MAINSTREAM}}$ ) = 0.33  
8 to 0.52, with street health patients showing a mean 12% greater chance of multimorbidity than  
9 mainstream patients in this age group.  
10  
11  
12  
13

14  
15  
16 Overall for the street health Aboriginal patients, multimorbidity (2+ domains) was present in 50.4%  
17 (386/765, 95% confidence interval 46.9 to 53.9%) compared with 44.6% (813/1821, 95% CI 42.4 to  
18 46.9%) in non-Aboriginals,  $p=0.007$ . A total of 33.2% of Aboriginal patients (254/766) had 3+  
19 domains affected compared with 25.8% (470/1821) in non-Aboriginals,  $p<0.001$ , while 13.7%  
20 (105/765) had 5+ domains affected compared with 8.5% (154/1821) in non-Aboriginals,  $p<0.001$ .  
21 Stratified by age, the prevalence of multimorbidity (2+) across all age groups was significantly higher  
22 among Aboriginal compared with non-Aboriginal patients,  $p<0.001$  (Figure 3).  
23  
24  
25  
26  
27

### 28 **Patterns of Multimorbidity**

29  
30 Table 2 displays the prevalence of the five most common body system domain combinations across  
31 single, 1+, 2+, 3+ and 5+ domains for the street health sample with corresponding prevalence rates  
32 in mainstream practice for comparison. Table 2 also displays the prevalence of the five most  
33 common domain combinations stratified by age.  
34  
35  
36  
37

38 Table 3 displays the prevalence of the five most common domain combinations across single, 1+, 2+,  
39 3+ and 5+ domains stratified by Indigenous status and age.  
40  
41

42  
43 Consistent with the CIRS guidelines, patients with conditions that appeared to be ongoing (for  
44 example, leg ulcers, non-healing skin infections and lacerations and scabies infestation) were  
45 included in the musculoskeletal/integumental domain.  
46  
47  
48  
49  
50  
51  
52  
53  
54  
55  
56  
57  
58  
59  
60



Table 2. Overall and age category breakdown for the 5 most common domains for Street Health cohort

|                                       | Domains                                               | Street Health<br>% (n) | Mainstream<br>practice<br>% (n) <sup>a-d</sup> | Age category (Street health cohort only) |            |            |           |           |
|---------------------------------------|-------------------------------------------------------|------------------------|------------------------------------------------|------------------------------------------|------------|------------|-----------|-----------|
|                                       |                                                       |                        |                                                | < 25                                     | 25 to 44   | 45 to 64   | 65 to 74  | 75+       |
| One domain<br>only<br>(n = 798)       | Musculoskeletal                                       | 29.8 (238)**           | 21.8 (231)                                     | 24.2 (58)                                | 49.2 (117) | 19.7 (47)  | 5.9 (14)  | 0.8 (2)   |
|                                       | Psychiatric                                           | 20.3 (162)             | 18.7 (198)                                     | 20.4 (33)                                | 53.7 (87)  | 24.1 (39)  | 1.9 (3)   | 0         |
|                                       | Eye, ear, nose and throat                             | 13.7 (109)*            | 9.7 (103)                                      | 62.4 (68)                                | 18.3 (20)  | 14.7 (16)  | 0.9 (1)   | 3.7 (4)   |
|                                       | Respiratory                                           | 9.4 (75)               | 17.8 (188)                                     | 38.7 (29)                                | 29.3 (22)  | 30.7 (23)  | 1.3 (1)   | 0         |
|                                       | Genitourinary                                         | 6.9 (55)               | 8.5 (90)                                       | 14.5 (8)                                 | 69.1 (38)  | 14.5 (8)   | 1.8 (1)   | 0         |
| One or more<br>domains<br>(n = 1997)  | Psychiatric                                           | 46.7 (933)**           | 34.6 (1161)                                    | 8.6 (80)                                 | 48.9 (456) | 36.5 (341) | 4.7 (44)  | 1.3 (12)  |
|                                       | Musculoskeletal                                       | 42.9 (856)             | 45.2 (1514)                                    | 13.1 (112)                               | 44.6 (382) | 31.8 (272) | 7.1 (61)  | 3.4 (29)  |
|                                       | Respiratory                                           | 35.0 (699)             | 35.6 (1193)                                    | 11.7 (82)                                | 43.2 (302) | 38.6 (270) | 4.9 (34)  | 1.6 (11)  |
|                                       | Eye, ear, nose and throat                             | 19.1 (381)*            | 22.7 (762)                                     | 29.4 (112)                               | 29.7 (113) | 29.7 (113) | 6.3 (24)  | 5.0 (19)  |
|                                       | Vascular                                              | 18.2 (364)**           | 22.3 (746)                                     | 3.3 (12)                                 | 17.6 (64)  | 53.8 (196) | 13.5 (49) | 11.8 (43) |
| Two or more<br>domains<br>(n = 1199)  | Psychiatric + Respiratory                             | 37.1 (445)**           | 18.8 (432)                                     | 7.2 (32)                                 | 48.3 (215) | 39.1 (174) | 4.3 (19)  | 1.1 (5)   |
|                                       | Psychiatric + Musculoskeletal                         | 32.4 (388)**           | 22.2 (510)                                     | 3.6 (14)                                 | 47.2 (183) | 41.8 (162) | 5.7 (22)  | 1.8 (7)   |
|                                       | Respiratory + Musculoskeletal                         | 25.6 (307)*            | 22.4 (515)                                     | 5.9 (18)                                 | 42.3 (130) | 43.3 (133) | 6.8 (21)  | 1.6 (5)   |
|                                       | Vascular + Musculoskeletal                            | 14.6 (175)**           | 19.4 (445)                                     | 2.3 (4)                                  | 17.7 (31)  | 50.9 (89)  | 15.4 (27) | 13.7 (24) |
|                                       | Hepatic-Pancreatic + Psychiatric                      | 14.3 (172)**           | 2.8 (64)                                       | 1.7 (3)                                  | 45.9 (79)  | 45.9 (79)  | 5.3 (9)   | 1.2 (2)   |
| Three or more<br>domains<br>(n = 724) | Psychiatric + Respiratory + Musculoskeletal           | 30.9 (224)**           | 14.7 (215)                                     | 3.6 (8)                                  | 42.4 (95)  | 47.3 (106) | 5.8 (13)  | 0.9 (2)   |
|                                       | Psychiatric + Haematological + Endocrine              | 14.5 (105)             | 14.1 (206)                                     | 3.8 (4)                                  | 37.1 (39)  | 46.7 (49)  | 8.6 (9)   | 3.8 (4)   |
|                                       | Psychiatric + Respiratory + Vascular                  | 14.4 (104)**           | 8.5 (125)                                      | 2.9 (3)                                  | 25.0 (26)  | 60.6 (63)  | 8.7 (9)   | 2.9 (3)   |
|                                       | Psychiatric + Musculoskeletal + Vascular              | 14.2 (103)             | 13.1 (192)                                     | 1.0 (1)                                  | 18.4 (19)  | 60.2 (62)  | 14.6 (15) | 5.8 (6)   |
|                                       | Psychiatric + Respiratory + Lower<br>Gastrointestinal | 13.8 (100)**           | 5.9 (87)                                       | 1.0 (1)                                  | 46.0 (46)  | 50.0 (50)  | 1.0 (1)   | 2.0 (2)   |

<sup>a</sup> For 1 domain only, denominator (n = 1058), <sup>b</sup> For 1+ domains, denominator (n = 3352), <sup>c</sup> For 2+ domains, denominator (n = 2294), <sup>d</sup> For 3+ domains, denominator (n = 1772)

\* Chi square test significant at .05 level vs mainstream practice

\*\* Chi square test significant at .001 level vs mainstream practice

Table 3. Overall and age category breakdown for the 5 most common domains for Aboriginal Street Health patients

|                                    | Domains                                     | Aboriginal<br>% (n) | Non-Aboriginal<br>% (n) <sup>a-d</sup> | Age category (Aboriginal patients only) |            |            |          |         |
|------------------------------------|---------------------------------------------|---------------------|----------------------------------------|-----------------------------------------|------------|------------|----------|---------|
|                                    |                                             |                     |                                        | < 25                                    | 25 to 44   | 45 to 64   | 65 to 74 | 75+     |
| One domain only<br>(n = 216)       | Musculoskeletal                             | 34.3 (74)           | 28.2 (164)                             | 55.4 (41)                               | 36.5 (27)  | 8.1 (6)    | 0        | 0       |
|                                    | Eye, ear, nose and throat                   | 19.0 (41)*          | 11.7 (68)                              | 85.4 (35)                               | 12.2 (5)   | 2.4 (1)    | 0        | 0       |
|                                    | Psychiatric                                 | 13.0 (28)*          | 23.0 (134)                             | 25.0 (7)                                | 57.1 (16)  | 17.9 (5)   | 0        | 0       |
|                                    | Respiratory                                 | 8.3 (18)            | 9.8 (57)                               | 55.6 (10)                               | 22.2 (4)   | 22.2 (4)   | 0        | 0       |
|                                    | Lower gastrointestinal                      | 6.0 (13)            | 5.0 (29)                               | 30.8 (4)                                | 53.8 (7)   | 15.4 (2)   | 0        | 0       |
| One or more domains<br>(n = 602)   | Musculoskeletal                             | 47.5 (286)*         | 40.9 (570)                             | 25.9 (74)                               | 40.2 (115) | 30.1 (86)  | 3.1 (9)  | 0.7 (2) |
|                                    | Psychiatric                                 | 45.5 (274)          | 47.2 (659)                             | 10.6 (29)                               | 47.8 (131) | 37.2 (102) | 4.0 (11) | 0.4 (1) |
|                                    | Respiratory                                 | 38.7 (233)*         | 33.4 (466)                             | 16.3 (38)                               | 42.5 (99)  | 36.9 (86)  | 3.4 (8)  | 0.9 (2) |
|                                    | Eye, ear, nose and throat                   | 24.9 (150)**        | 16.6 (231)                             | 42.0 (63)                               | 27.3 (41)  | 24.7 (37)  | 4.0 (6)  | 2.0 (3) |
|                                    | Endocrine                                   | 24.4 (147)**        | 13.3 (186)                             | 7.5 (11)                                | 34.0 (50)  | 46.9 (69)  | 8.8 (13) | 2.7 (4) |
| Two or more domains<br>(n = 386)   | Psychiatric + Respiratory                   | 39.6 (153)          | 35.9 (292)                             | 9.8 (15)                                | 47.7 (73)  | 38.6 (59)  | 3.3 (5)  | 0.7 (1) |
|                                    | Psychiatric + Musculoskeletal               | 35.2 (136)          | 31.0 (252)                             | 5.1 (7)                                 | 46.3 (63)  | 44.1 (60)  | 4.4 (6)  | 0       |
|                                    | Respiratory + Musculoskeletal               | 31.3 (121)*         | 22.9 (186)                             | 9.1 (11)                                | 42.1 (51)  | 43.8 (53)  | 4.1 (5)  | 0.8 (1) |
|                                    | Respiratory + Endocrine                     | 20.2 (78)**         | 7.7 (63)                               | 5.1 (4)                                 | 35.9 (28)  | 50.0 (39)  | 7.7 (6)  | 1.3 (1) |
|                                    | Psychiatric + Endocrine                     | 19.2 (74)**         | 10.2 (83)                              | 5.4 (4)                                 | 36.5 (27)  | 47.3 (35)  | 9.5 (7)  | 1.4 (1) |
| Three or more domains<br>(n = 254) | Psychiatric + Respiratory + Musculoskeletal | 35.8 (91)*          | 28.3 (133)                             | 5.5 (5)                                 | 44.0 (40)  | 47.3 (43)  | 3.3 (3)  | 0       |
|                                    | Psychiatric + Haematological + Endocrine    | 22.4 (57)**         | 10.2 (48)                              | 3.5 (2)                                 | 40.4 (23)  | 47.4 (27)  | 7.0 (4)  | 1.8 (1) |
|                                    | Respiratory + Musculoskeletal + Endocrine   | 18.9 (48)**         | 7.4 (35)                               | 2.1 (1)                                 | 31.3 (15)  | 60.4 (29)  | 6.3 (3)  | 0       |
|                                    | Vascular + Respiratory + Endocrine          | 18.5 (47)**         | 6.8 (32)                               | 0                                       | 27.7 (13)  | 63.8 (30)  | 6.4 (3)  | 2.1 (1) |
|                                    | Psychiatric + Vascular + Respiratory        | 18.1 (46)*          | 12.3 (58)                              | 2.2 (1)                                 | 28.3 (13)  | 65.2 (30)  | 2.2 (1)  | 2.2 (1) |

<sup>a</sup> For 1 domain only, denominator (n = 582), <sup>b</sup> For 1+ domains, denominator (n = 1395), <sup>c</sup> For 2+ domains, denominator (n = 813), <sup>d</sup> For 3+ domains, denominator (n = 470)

\* Chi square test significant at .05 level vs Non-Aboriginal

\*\* Chi square test significant at .001 level vs Non-Aboriginal

### Multimorbidity Severity Index

Overall, GLM analysis revealed a significantly greater severity of disease among the street health cohort. Controlling for age and gender, street health patients ( $M = 1.4$ ,  $SD = .91$ ) had significantly higher multimorbidity severity than mainstream patients ( $M = 1.1$ ,  $SD = .80$ ),  $p < 0.001$ .

A significantly greater proportion of the street health patients were represented in the moderate (34.1%, 883/2587, 95% confidence interval 32.3 to 35.9%),  $p < 0.001$ , and severe categories (4.9%, 126/2587, 95% CI 4.1 to 5.8%),  $p < 0.001$ , compared with mainstream patients (moderate: 21.0%, 961/4583, 95% CI 19.8 to 22.2%; severe: 1.2%, 53/4583, 95% CI, 0.9 to 1.5%). When multimorbidity severity was stratified by age (Figure 4), a greater proportion of street health patients were again represented in the moderate and severe categories across every age category.

Overall, 24.4% (632/2587) of street health patients compared to 10.1% (463/4583) of mainstream patients had at least one level 3 or level 4 score across domains,  $p < 0.001$ . For patients with multimorbidity, this was 44.2% (530/1199) for street health cohort vs 18.3% (420/2294) of mainstream patients,  $p < 0.001$ .

Figure 5 shows the frequency trends of number of domains with level 3 or 4 scores[20] for patients with multimorbidity across 2+ domains for both cohorts, revealing a more pronounced and earlier onset of increased disease burden in the 25-44 and 45-64 year age group for street health patients but especially Aboriginal patients.

For the street health cohort, Aboriginal patients scored marginally higher on the CIRS Severity Index ( $M = 1.39$ ,  $SD = 0.89$ ) compared with non-Aboriginal patients ( $M = 1.34$ ,  $SD = 0.91$ ), although this difference was not statistically significant,  $p = 0.610$ .

### Factors Associated with Multimorbidity

Logistic regression analyses using the occurrence of multimorbidity across 2+, 3+ and 5+ domains as the criterion variable showed multimorbidity to be significantly associated with male gender, increasing age and Indigenous status (Table 4). Indigenous status was the strongest predictor of multimorbidity in each model. Aboriginal patients had an 87% increase in the likelihood of displaying multimorbidity across 2+ domains compared with non-Aboriginals. Aboriginal patients were also twice as likely to show multimorbidity across 3+ domains and nearly three times more likely to show multimorbidity across 5+ domains.

**Table 4. Relation between socio-demographic characteristics and the prevalence of multimorbidity**

| Characteristic    | Odds ratio | 95% CI       |
|-------------------|------------|--------------|
| <b>2+ Domains</b> |            |              |
| Male*             | 1.44       | 1.22 to 1.70 |
| Age *             | 1.01       | 1.04 to 1.05 |
| Indigenous*       | 1.87       | 1.55 to 2.26 |
| <b>3+ Domains</b> |            |              |
| Male*             | 1.41       | 1.17 to 1.70 |
| Age*              | 1.04       | 1.04 to 1.05 |
| Indigenous*       | 2.17       | 2.17 to 2.66 |
| <b>5+ Domains</b> |            |              |
| Male*             | 1.26       | 0.96 to 1.67 |
| Age*              | 1.05       | 1.04 to 1.06 |
| Indigenous*       | 2.82       | 2.11 to 3.77 |

\*  $p < .001$ 

## DISCUSSION

Research on multimorbidity among street health populations is scarce with little data available on patterns, prevalence or disease severity among particular age or ethnic groups. Existing research has tended to focus on specific areas, such as homelessness and mental health,[27-29] with little attention on the cumulative and synergistic effects of multiple chronic conditions or a broader biopsychosocial approach to health care needs.[4,30] The prevalence of multimorbidity is higher in deprived as opposed to more affluent areas[3,31] with multiple physical diseases often co-existing among patients with mental illness.[4,31,32]

This is the first study to use 42 conditions affecting anatomical domains to estimate patterns and prevalence of multimorbidity among marginalised and homeless patients attending a designated, primary care-run, street-based outreach service. Like our earlier mainstream practices study,[24] we include an estimation of disease severity to enhance the overall picture of multimorbidity burden in this population.

Key findings from our study include that multimorbidity is significantly associated with male gender, increasing age and Indigenous status with the latter the strongest predictor of multimorbidity irrespective of whether 2+, 3+ or 5+ domains are used as the criterion variable.

### Strengths and limitations of the study

1  
2  
3 The strengths of this study include the large street health cohort size involving the total population  
4 seen over a six year period and the fact that we include a disease severity rating for each patient in  
5 addition to prevalence and patterns data recorded.  
6  
7

8  
9 A major difficulty we encountered was enumerating the homeless population mainly because it  
10 lacked a common definition.[33] The open access policy to the street health service could have had a  
11 diluting effect on the proportion of more traditional users of the service because of one-off  
12 opportunistic and convenience attendances. Among street health patients, 22.8% had no  
13 multimorbidity compared with 26.9% among mainstream patients.  
14  
15

16  
17 In addition, whilst the street health population is based on data collected over a six year period, the  
18 comparator mainstream practice data was collected over six months.[24]  
19  
20

### 21 **Prevalence and patterns**

22  
23 ~~Whilst~~ Multimorbidity prevalence among the street health cohort was ~~lower~~ significantly higher than  
24 the age-sex adjusted prevalence for the mainstream cohort. The age breakdown across 2+ domains  
25 ~~shows~~ shows younger patients as much more vulnerable to having multiple chronic conditions with a  
26 12% greater likelihood among 23 - 34 year old patients. This contrasts with findings from our earlier  
27 research where prevalence patterns progressively increased from the 25 – 44 year age group to the  
28 45 – 64 and 65 -74 year age groups.[24] The reason for multimorbidity peaking in the 25 - 44 year  
29 age group in the street health population could be explained by the premature deaths of these  
30 patients or the possibility that those surviving to older age start attending mainstream practices or  
31 become institutional residents.  
32  
33

34  
35 A key finding from our study is the willingness of Aboriginal patients to attend the street health  
36 service - 29.6% v. 1.6% to Australian primary care practices[34] – and that Aboriginal patients overall  
37 are significantly younger – 36.8% v. 18.9% under 25 years old - than non-Aboriginal patients. Due to  
38 a lack of data on Aboriginality amongst the mainstream practice, it was not possible to compare  
39 both cohorts. Among the street health population, Aboriginal patients have significantly higher rates  
40 of multimorbidity across all age groups and number of domains affected.  
41  
42  
43  
44  
45  
46  
47  
48  
49  
50

51  
52 The high prevalence of psychiatric morbidity (46.7%) was not unexpected. The three most common  
53 domains - psychiatric, musculoskeletal (42.9%) and respiratory (35.0%) - are similar to mainstream  
54 except that psychiatry and musculoskeletal are juxtaposed.[24] These three domains remain most  
55  
56  
57  
58  
59  
60

1  
2  
3 common even when 2+ or 3+ domains are examined and may act to facilitate or accelerate other  
4 morbidities resulting in premature ageing or progressive deterioration.

5  
6  
7 A notable feature of the street population was the high prevalence of chronic skin conditions (leg  
8 ulcers, slow to heal infections/lacerations and scabies) reflecting the reality of poor living  
9 circumstances and hygiene. Inclusion of these conditions as part of the  
10 musculoskeletal/integumental domain is likely to have increased the overall prevalence for this  
11 domain. The possibility that early onset of psychiatric illness may in turn contribute to a cascade of  
12 homelessness, lack of stable relationships and failure to achieve educational potential should be  
13 considered.  
14  
15  
16  
17  
18

### 19 **Disease severity**

20  
21 Disease severity burden is of particular value in disadvantaged populations because the cumulative  
22 and synergistic nature of their multimorbidities impacts on their need for appropriate health  
23 services[30] while their socioeconomic circumstances renders their access to such services  
24 inequitable. American, [10] Canadian[9] and British[12,13] studies have all found much common  
25 ground with housing, mental illness, poor education and smoking common factors throughout.  
26 Complex interventions invariably do better when housing is integrated into the solution and the  
27 importance of social geography and family supports acknowledged.[7] There is no definitive answer  
28 but well integrated support networks built around primary care services would appear a logical way  
29 forward.  
30  
31  
32  
33  
34  
35  
36  
37  
38

39 We found the multimorbidity SI significantly higher for street health patients, more pronounced with  
40 'moderate' and 'severe' morbidity and persisting across all age categories. Given the large numbers  
41 in the two population cohorts, the relatively small but significant differences of 13% in the  
42 moderately severe and 4% in the severe disease severity index categories translate to a substantial  
43 number of patients. The impost in terms of service delivery could therefore be greater than is  
44 primarily evident. Taken together with the fact that the presence of multiple severe or moderately  
45 severe chronic conditions is not compatible with long-term survival or management in the primary  
46 care setting especially amongst a marginalised, street health population, it is likely to impact directly  
47 on Emergency Department visits and hospital admissions. Although overall prevalence is lower in  
48  
49  
50  
51  
52

53 After age-sex adjustment, multimorbidity prevalence is significantly higher among the street health  
54 cohort, where ~~Where~~ disease exists, it tends to be of significantly greater severity. This is also as  
55 reflected ~~in~~ by the more pronounced domain level 3 and level 4 scores. This supporting supports  
56  
57  
58  
59  
60

1  
2  
3 earlier research by Starfield and Kinder[35] that morbidities are not randomly distributed amongst  
4 populations. Instead, those with the highest vulnerability to illness have a greater disadvantage  
5 because the clustering of morbidities in these sub-populations diminishes their quality of life.[3]  
6  
7 Multimorbidity in such circumstances impacts negatively not just on their functioning status[36,37]  
8 but also causes increased and poorly co-ordinated use of health services,[5] increased direct and  
9 indirect healthcare costs[6] and heightens the risk of premature death.[38,39]  
10  
11

## 12 13 **Conclusion**

14  
15  
16 Our study reports on the prevalence, patterns and disease severity of multimorbidity among a  
17 marginalised population attending a primary care-led, street health clinic in Western Australia.  
18 Overall, the probability of early onset (23-34 years) multimorbidity is higher in the street health  
19 cohort compared with mainstream practice but not in patients aged over 45 years with psychiatric,  
20 musculoskeletal and respiratory the commonest domains affected. For Aboriginal patients, the  
21 prevalence of multimorbidity is higher across all ages but especially if aged < 25 years.  
22  
23

24  
25  
26  
27  
28  
29 Disease severity is significantly higher in the street health population, especially Aboriginal patients,  
30 with greater 'moderate' and 'severe' morbidity and persists across all age categories. Attendance  
31 patterns for Aboriginal patients suggest they are more likely to engage with street-based, outreach  
32 service than mainstream practice. Reasons for this increased engagement warrant further  
33 investigation.  
34  
35  
36

37  
38 Our findings have implications on the design and delivery of health care services to meet the  
39 increasing challenge of multimorbidity[4,40] in disadvantaged and Indigenous populations.

40  
41 Traditional approaches to service delivery fail to meet the needs of this population.[12]  
42 Such services need more complex interventions but are unlikely to receive appropriate health  
43 services expenditure and compare unfavourably with that offered to mainstream patients. A more  
44 integrated outreach approach involving better housing, psychiatric, education and social supports  
45 would seem logical to address their needs. Longer term prospective studies including an economic  
46 analysis component would be helpful.  
47  
48  
49  
50  
51  
52  
53

## 54 **WHAT THIS PAPER ADDS:**

55  
56 **What is already known on this subject**  
57  
58  
59  
60

1  
2  
3 Marginalised and homeless people have more chronic diseases, high mortality rates, high direct and  
4 indirect health care costs and generally make poor utilisation of available health services. Mental  
5 illness, drug and alcohol abuse are especially common in homeless people. The Inverse Care Law[11]  
6 ensures that those in greatest need generally receive the least treatment.  
7  
8  
9

### 10 **What this study adds**

11  
12 Our study shows multimorbidity amongst street health patients is common, more severe and exists  
13 across all anatomical domains with younger patients (23-34 year olds) and Aboriginal patients  
14 especially vulnerable. Among the street health population, multimorbidity is significantly associated  
15 with male gender, increasing age and Indigenous status. Aboriginal patients comprise 29.6% of the  
16 street health cohort which compares favourably with the 1.6% attending mainstream Australian  
17 practices and offers hope for greater engagement of basic health services into the future.  
18  
19  
20  
21  
22

### 23 **ACKNOWLEDGEMENTS**

24  
25 We acknowledge the assistance of the staff at the Freo Street Doctor clinic, Fremantle Medicare  
26 Local and the medical practice involved in the study. We acknowledge the assistance of Drs Maeve  
27 Kiely and Cam Phan with data acquisition. Research support was received from The Australian  
28 Commonwealth Government Primary Health Care Research Evaluation and Development (PHCRED)  
29 Strategy Phase 2. The General Practice and Primary Health Care Research Unit is partly funded under  
30 the Collaborative Research Network (CRN) Program Grant from the Australian Government  
31 Department of Education to the University of Notre Dame Australia. We also acknowledge financial  
32 support from J Galvin, W Cunningham, L Ryan and A Neale.  
33  
34  
35  
36  
37  
38  
39  
40  
41  
42  
43  
44  
45  
46  
47  
48  
49  
50  
51  
52  
53  
54  
55  
56  
57  
58  
59  
60



**CONFLICT DISCLOSURE**

All authors have completed the ICMJE uniform disclosure form at [www.icmje.org/coi\\_disclosure.pdf](http://www.icmje.org/coi_disclosure.pdf) and declare: TB, DAR, LT and RGM have received research grant funding; DAR has received support from research donations; no other relationships or activities that could appear to have influenced the submitted work.

**DATA SHARING STATEMENT**

No additional data are available

**CONTRIBUTORS**

TB and DAR made substantial contributions to the conception and design of the work as well as the acquisition, analysis and interpretation of data for the study.

LT and MB made substantial contributions to the analysis and interpretation of data.

RGM made substantial contributions to the acquisition of data.

TB, DAR and LT were responsible for drafting the manuscript and all authors revised it critically for important intellectual content, final approval of the version to be published and agree to be accountable for all aspects of the work in ensuring that questions related to the accuracy or integrity of any part of the work are appropriately investigated and resolved.

**REFERENCES**

1. Barnett K, Mercer SW, Norbury M, et al. Epidemiology of multimorbidity and implications for health care, research, and medical education: a cross-sectional study. *Lancet* 2012;**380**:37-43 doi: 10.016/S0140-6736(12)60240-2.
2. Fortin M, Lapointe L, Hudon C, et al. Multimorbidity and quality of life in primary care: a systematic review. *Health and Quality of Life Outcomes* 2004;**2**:51.
3. Mercer S, Watt G. The Inverse Care Law: Clinical primary care encounters in deprived and affluent areas of Scotland. *Ann Fam Med* 2007;**5**:503-10.
4. Payne R, Gray A, Guthrie B, et al. The effect of physical multimorbidity, mental health conditions and socioeconomic deprivation on unplanned admissions to hospital: a retrospective cohort study. *CMAJ* 2013;**185**(5):E221-8 doi: 10.1503/cmaj.121349.
5. Salisbury C, Johnson L, Purdy S, et al. Epidemiology and impact of Multimorbidity in primary care: a retrospective cohort study. *Br J Gen Pract* 2011;**61**:18-24.
6. Hoffman C, Rice D, Hai-Yen S. Persons with chronic conditions - their prevalence and costs. *JAMA* 1996;**276**:1473-79.
7. Sadowski L, Kee R, VanderWeele T, et al. Effect of a housing and case management program on emergency department visits and hospitalizations among chronically ill homeless adults. *JAMA* 2009;**301**:1771-8.
8. Glynn L, Valderas JM, Healy P, et al. The prevalence of Multimorbidity in primary care and its effect on health care utilisation and cost. *Fam Pract* 2011(28):516-23 doi: 10.1093/fampra/cmr013.
9. Hwang S, Wilkins R, Tjepkema M, et al. Mortality among residents of shelters, rooming houses, and hotels in Canada: 11 year follow-up study. *BMJ* 2009;**339**:b4036 doi: 10.1136/bmj.b4036.
10. Lantz P, House J, Lepkowski J, et al. Socioeconomic factors, health behaviors, and mortality: results from a nationally representative prospective study of US adults. *JAMA* 1998;**279**:1703-08.
11. Tudor-Hart J. The inverse care law. *Lancet* 1971;**1**:405-12.
12. Fazel S, Khosla V, Doll H, et al. The prevalence of mental disorders among the homeless in western countries: systematic review and meta-regression analysis. *PLoS Medicine* 2008;**5**(12):e225 doi: 10.1371/journal.pmed.0050225
13. Shaw M, Dorling D, Brimblecombe N. Life chances in Britain by housing wealth and for the homeless and vulnerably housed. *Environment and Planning A* 1999;**31**:2239-48.
14. Riley A, Harding G, Underwood M, et al. Homelessness: a problem for primary care? . *Br J Gen Pract* 2003;**55**:474-79.

- 1  
2  
3 15. Gunn JM, Ayton DR, Densley K, et al. The association between chronic illness, multimorbidity and  
4 depressive symptoms in an Australian primary care cohort. *Social Psychiatry and Psychiatric*  
5 *Epidemiology* 2012;**47**:175-84.
- 6  
7 16. Bloch G, Rozmovits L, Giambrone B. Barriers to primary care responsiveness to poverty as a risk  
8 factor for health. *BMC Family Practice* 2011;**12**:62 doi: 10.1186/1471-2296-12-62.
- 9  
10 17. Gelberg L, Gallagher T, Andersen R, et al. Competing priorities as a barrier to medical care among  
11 homeless adults in Los Angeles. *Am J Public Health* 1997;**87**:217-20.
- 12  
13 18. Jeal N, Salisbury C. Self reported experiences of health services among female street-based  
14 prostitutes: a cross sectional survey. *Br J Gen Pract* 2004;**54**:215-19.
- 15  
16 19. Cummings M, Kang M. Youth health services - improving access to primary care. *Australian*  
17 *Family Physician* 2012;**41**:339-41.
- 18  
19 20. Miller MD, Paradis CF, Houck PR, et al. Rating Chronic Medical Illness Burden in Geropsychiatric  
20 Practice and Research: Application of the Cumulative Illness Rating Scale *Psychiatric Res*  
21 *1992*;**41**:237-48 doi: [http://dx.doi.org/10.1016/0165-1781\(92\)90005-N](http://dx.doi.org/10.1016/0165-1781(92)90005-N).
- 22  
23 21. Murray S, Skull S. Hurdles to health: immigrant and refugee health care in Australia. . *Aus Health*  
24 *Rev* 2005;**29**:25-29.
- 25  
26 22. Parslow R, Jorm A, Christensen H, et al. Factors associated with young adults obtaining general  
27 practitioner services. . *Aus Health Rev* 2002;;**25**:109-17.
- 28  
29 23. Shadmi E. Multimorbidity and equity in health. *International J for Equity in Health* 2013;**12**:59  
30 doi: doi:10.1186/1475-9276-12-59.
- 31  
32 24. Brett T, Arnold-Reed D, Popescu A, et al. Multimorbidity in patients attending 2 Australian  
33 primary care practices. *Ann Fam Med* 2013;**11**:535-42 doi: 10.1370/afm.1570.
- 34  
35 25. Hudon C, Fortin M, Soubhi H. Abbreviated guidelines for scoring Cumulative Illness Rating Scale  
36 (CIRS) in family practice. *J Clin Epidemiol* 2007;**60**:212.
- 37  
38 26. O'Halloran J, Miller G, Britt H. Defining chronic conditions for primary care with ICPC-2. *Fam*  
39 *Pract* 2004;**21**:381-86.
- 40  
41 27. Hermann H, Evert H, Harvey C, et al. Disability and service use among homeless people living  
42 with psychotic disorders. *Aust NZ J Psychiatry* 2004;**38**:965-74.
- 43  
44 28. Teesson M, Hodder T, Buhrich N. Psychiatric disorders in homeless men and women in inner  
45 Sydney. *Aust NZ J Psychiatry* 2004;**38**:162-68.
- 46  
47 29. Trevena L, Nutbeam D, Simpson J. Asking the right questions of disadvantaged and homeless  
48 communities: the role of housing, patterns of illness and reporting behaviours in the  
49 measurement of health status. *Aust NZ J Public Health* 2001;**25**:298-304.
- 50  
51  
52  
53  
54  
55  
56  
57  
58  
59  
60

- 1  
2  
3 30. Bayliss E, Ellis J, Steiner J. Seniors' self-reported multimorbidity captured biopsychosocial factors  
4 not incorporated into two other data-based morbidity measures. *J Clin Epidemiol*  
5 2009;**62**:550-57.  
6  
7  
8 31. Orueta J, Nuno-Solinis R, Garcia-Alvarez A, et al. Prevalance of multimorbidity according to the  
9 deprivation level among the elderly in the Basque Country. *BMC Public Health* 2013;**13**:918.  
10  
11 32. Andrade L, Bensenor I, Viana M, et al. Clustering of psychiatric and somatic illnesses in the  
12 general population: multimorbidity and socioeconomic correlates. *Braz J Med* 2010;**43**:483-  
13 91.  
14  
15 33. Fitzpatrick-Lewis D, Ganann R, Krisnaratne S, et al. Effectiveness of interventions to improve the  
16 health and housing status of homeless people: a rapid systematic review. *BMC Public Health*  
17 2011;**11**:638.  
18  
19 34. Britt H, Miller G, Charles J, et al. A decade of Australian general practice activity 2002-03 to 2011-  
20 12. General practice series. Sydney: Sydney University Press, 2012.  
21  
22 35. Starfield B, Kinder K. Multimorbidity and its measurement. *Health Policy* 2011;**103**:3-8.  
23  
24 36. Bayliss E, Bayliss M, Ware J, et al. Predicting declines in physical function in persons with multiple  
25 chronic conditions: what we can learn from the medical problem list. *Health and Quality of*  
26 *Life Outcomes* 2004;**2**:47-51.  
27  
28 37. Lawson K, Mercer S, Wyke S, et al. Double trouble: the impact of Multimorbidity and deprivation  
29 on preference-weighted health related quality of life - a cross-sectional analysis of the  
30 Scottish Health Survey. *International J for Equity in Health* 2013;**12**:12: 67 doi:  
31 10.1186/1475-9276-12-67.  
32  
33 38. Gijzen R, Hoeymans N, Schellevis F, et al. Causes and consequences of comorbidity: A review. *J*  
34 *Clin Epidemiol* 2001;**54**:661-74.  
35  
36 39. Yancik R, Wesley M, Ries L, et al. Comorbidity and age as predictors of risk for early mortality of  
37 male and female colon carcinoma patients: a population based study. *Cancer* 1998;**82**:2123-  
38 34.  
39  
40 40. Tinetti M, Fried T, Boyd C. Designing health care for the most common chronic condition -  
41 multimorbidity. *JAMA* 2012:2493-94.  
42  
43  
44  
45  
46  
47  
48  
49  
50  
51  
52  
53  
54  
55  
56  
57  
58  
59  
60

**FIGURE LEGENDS**

**Figure 1.** Prevalence of multimorbidity within age groups [with 95% confidence intervals](#)

**Figure 2.** Probability of multimorbidity (2+ domains) as a function of age

**Figure 3.** Prevalence of multimorbidity in Street Health sample stratified by age and Indigenous status [with 95% confidence intervals](#)

**Figure 4.** Severity Index distribution within age groups

**Figure 5.** Frequency trends of number of domains with [Level-level](#) 3 or 4 scores

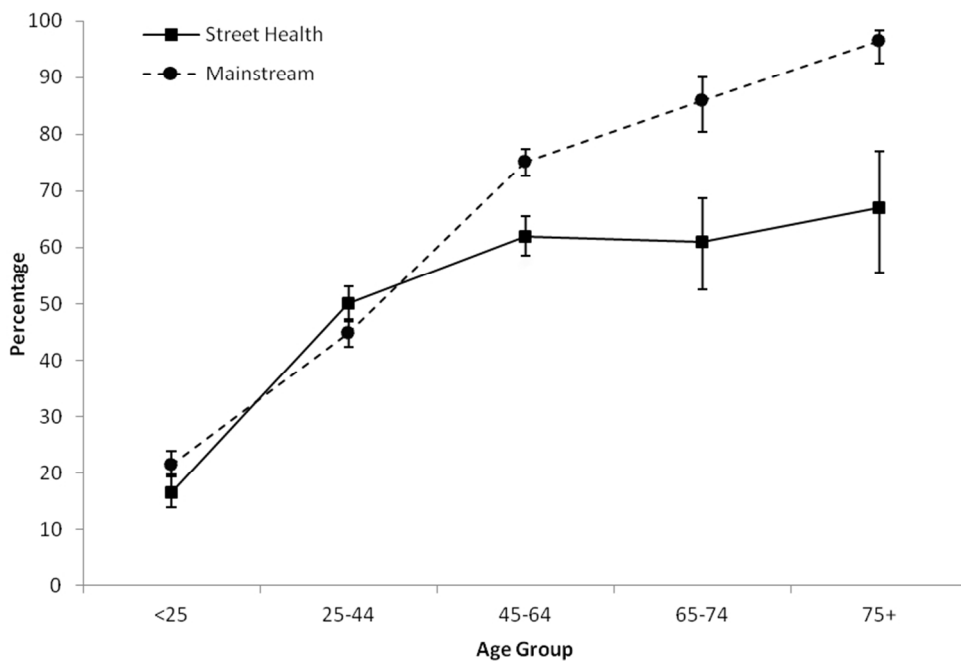

79x55mm (300 x 300 DPI)

view only

1  
2  
3  
4  
5  
6  
7  
8  
9  
10  
11  
12  
13  
14  
15  
16  
17  
18  
19  
20  
21  
22  
23  
24  
25  
26  
27  
28  
29  
30  
31  
32  
33  
34  
35  
36  
37  
38  
39  
40  
41  
42  
43  
44  
45  
46  
47  
48  
49  
50  
51  
52  
53  
54  
55  
56  
57  
58  
59  
60

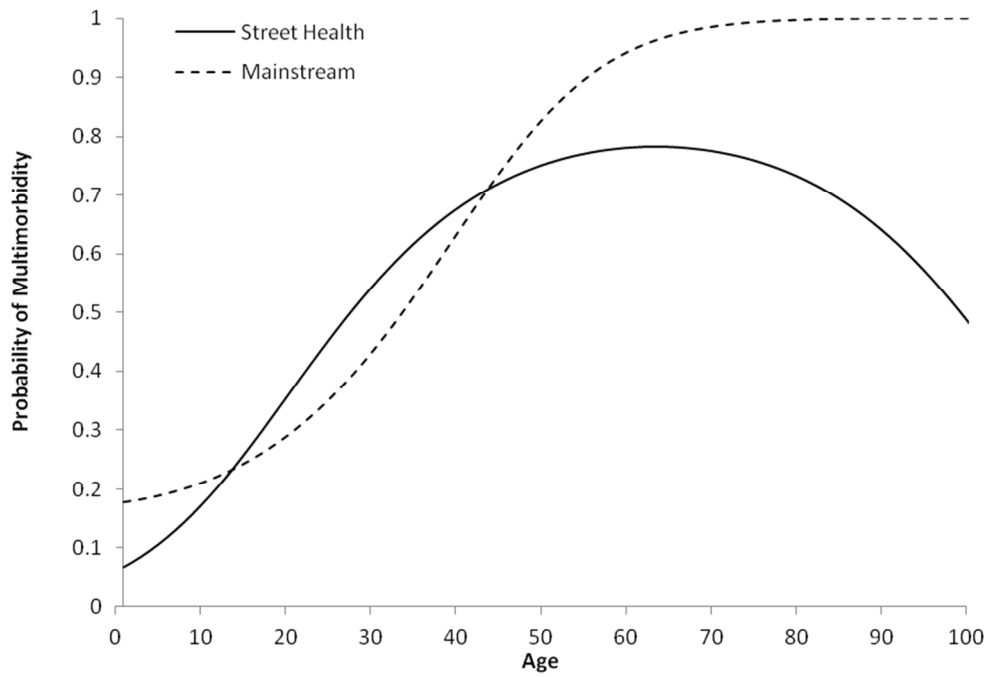

75x51mm (300 x 300 DPI)

Review only

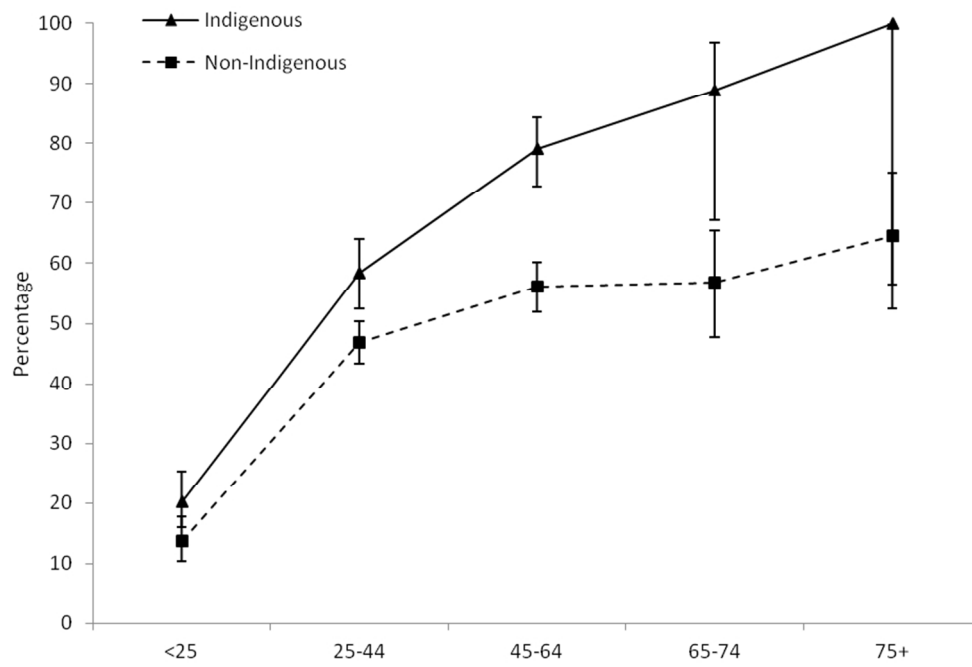

80x54mm (300 x 300 DPI)

view only

1  
2  
3  
4  
5  
6  
7  
8  
9  
10  
11  
12  
13  
14  
15  
16  
17  
18  
19  
20  
21  
22  
23  
24  
25  
26  
27  
28  
29  
30  
31  
32  
33  
34  
35  
36  
37  
38  
39  
40  
41  
42  
43  
44  
45  
46  
47  
48  
49  
50  
51  
52  
53  
54  
55  
56  
57  
58  
59  
60



1  
2  
3  
4  
5  
6  
7  
8  
9  
10  
11  
12  
13  
14  
15  
16  
17  
18  
19  
20  
21  
22  
23  
24  
25  
26  
27  
28  
29  
30  
31  
32  
33  
34  
35  
36  
37  
38  
39  
40  
41  
42  
43  
44  
45  
46  
47  
48  
49  
50  
51  
52  
53  
54  
55  
56  
57  
58  
59  
60

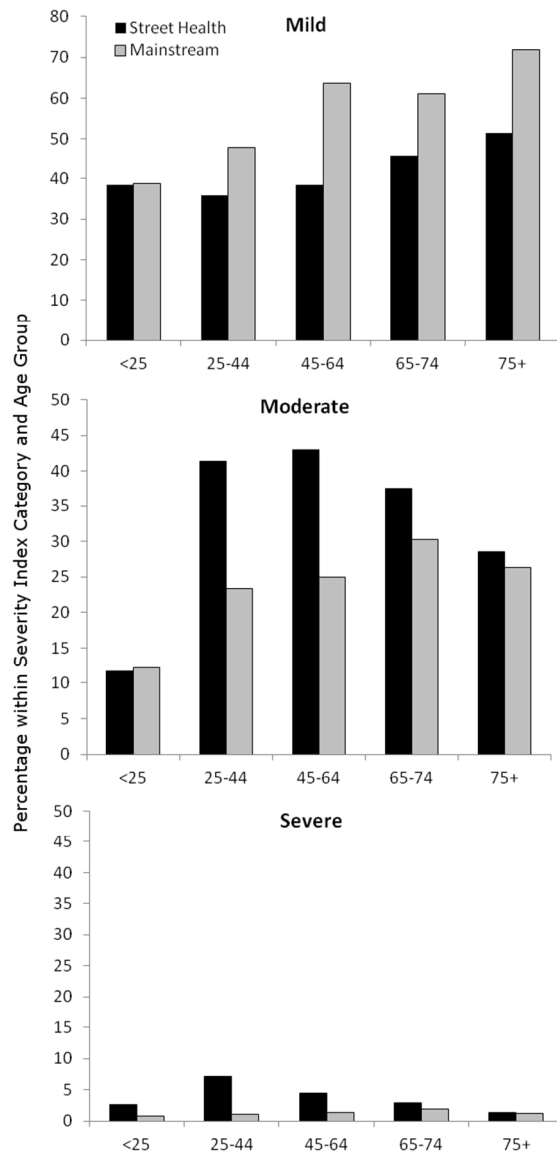

60x116mm (300 x 300 DPI)

1  
2  
3  
4  
5  
6  
7  
8  
9  
10  
11  
12  
13  
14  
15  
16  
17  
18  
19  
20  
21  
22  
23  
24  
25  
26  
27  
28  
29  
30  
31  
32  
33  
34  
35  
36  
37  
38  
39  
40  
41  
42  
43  
44  
45  
46  
47  
48  
49  
50  
51  
52  
53  
54  
55  
56  
57  
58  
59  
60

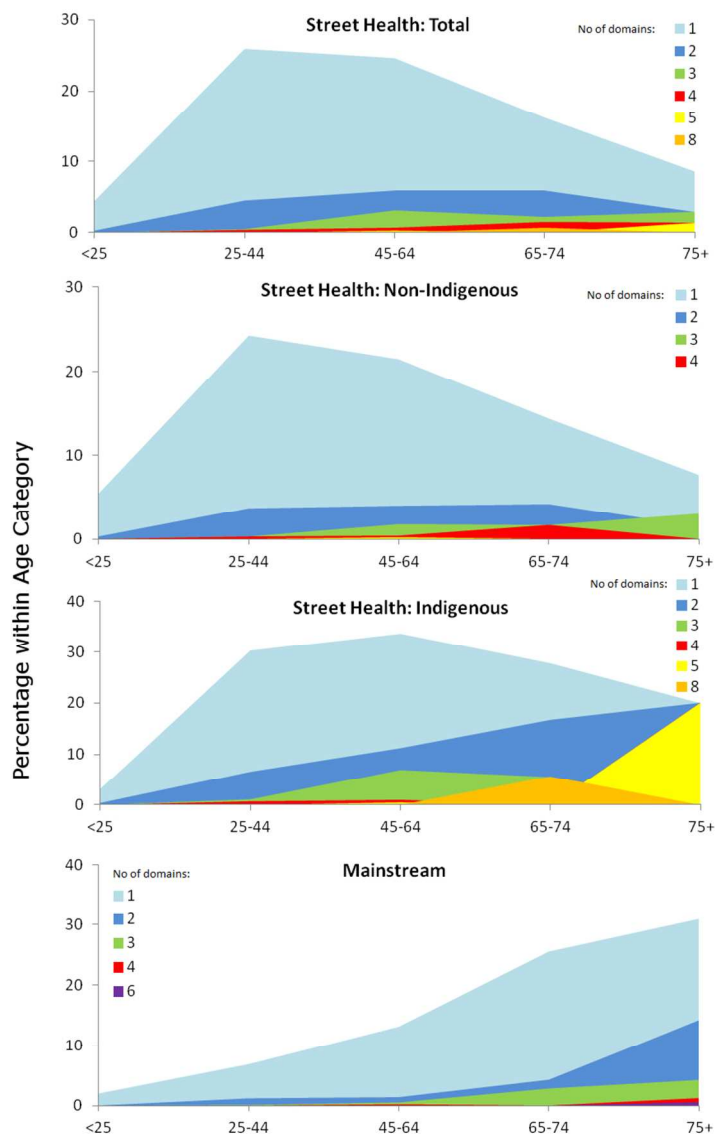

245x385mm (96 x 96 DPI)

## STROBE Statement—checklist of items that should be included in reports of observational studies

|                              | Item No | Recommendation                                                                                                                                                                                                                                                                                                                                                                                                                                                         | Page No (Line No)                         |
|------------------------------|---------|------------------------------------------------------------------------------------------------------------------------------------------------------------------------------------------------------------------------------------------------------------------------------------------------------------------------------------------------------------------------------------------------------------------------------------------------------------------------|-------------------------------------------|
| <b>Title and abstract</b>    | 1       | (a) Indicate the study's design with a commonly used term in the title or the abstract                                                                                                                                                                                                                                                                                                                                                                                 | Pg 1, 2                                   |
|                              |         | (b) Provide in the abstract an informative and balanced summary of what was done and what was found                                                                                                                                                                                                                                                                                                                                                                    | Pg 2                                      |
| <b>Introduction</b>          |         |                                                                                                                                                                                                                                                                                                                                                                                                                                                                        |                                           |
| Background/rationale         | 2       | Explain the scientific background and rationale for the investigation being reported                                                                                                                                                                                                                                                                                                                                                                                   | Pg 5                                      |
| Objectives                   | 3       | State specific objectives, including any prespecified hypotheses                                                                                                                                                                                                                                                                                                                                                                                                       | Pg 5 (50-55)                              |
| <b>Methods</b>               |         |                                                                                                                                                                                                                                                                                                                                                                                                                                                                        |                                           |
| Study design                 | 4       | Present key elements of study design early in the paper                                                                                                                                                                                                                                                                                                                                                                                                                | Pg 2 (9)                                  |
| Setting                      | 5       | Describe the setting, locations, and relevant dates, including periods of recruitment, exposure, follow-up, and data collection                                                                                                                                                                                                                                                                                                                                        | Pg 6 (7-15)                               |
| Participants                 | 6       | (a) <i>Cohort study</i> —Give the eligibility criteria, and the sources and methods of selection of participants. Describe methods of follow-up<br><i>Case-control study</i> —Give the eligibility criteria, and the sources and methods of case ascertainment and control selection. Give the rationale for the choice of cases and controls<br><i>Cross-sectional study</i> —Give the eligibility criteria, and the sources and methods of selection of participants | Pg 6 (7-15)                               |
|                              |         | (b) <i>Cohort study</i> —For matched studies, give matching criteria and number of exposed and unexposed<br><i>Case-control study</i> —For matched studies, give matching criteria and the number of controls per case                                                                                                                                                                                                                                                 |                                           |
| Variables                    | 7       | Clearly define all outcomes, exposures, predictors, potential confounders, and effect modifiers. Give diagnostic criteria, if applicable                                                                                                                                                                                                                                                                                                                               | Pg 6 (18-48)                              |
| Data sources/<br>measurement | 8*      | For each variable of interest, give sources of data and details of methods of assessment (measurement). Describe comparability of assessment methods if there is more than one group                                                                                                                                                                                                                                                                                   | Pg 7 (5-56)<br>Pg 8 (3-8)                 |
| Bias                         | 9       | Describe any efforts to address potential sources of bias                                                                                                                                                                                                                                                                                                                                                                                                              | -                                         |
| Study size                   | 10      | Explain how the study size was arrived at                                                                                                                                                                                                                                                                                                                                                                                                                              | Pg 6 (7-15)                               |
| Quantitative variables       | 11      | Explain how quantitative variables were handled in the analyses. If applicable, describe which groupings were chosen and why                                                                                                                                                                                                                                                                                                                                           |                                           |
| Statistical methods          | 12      | (a) Describe all statistical methods, including those used to control for confounding                                                                                                                                                                                                                                                                                                                                                                                  | Pg 6 (51-58)<br>Pg 7 (3-59)<br>Pg 8 (3-8) |
|                              |         | (b) Describe any methods used to examine subgroups and interactions                                                                                                                                                                                                                                                                                                                                                                                                    | Pg 7 (41-56)<br>Pg 8 (3-5)                |
|                              |         | (c) Explain how missing data were addressed                                                                                                                                                                                                                                                                                                                                                                                                                            | N/A                                       |
|                              |         | (d) <i>Cohort study</i> —If applicable, explain how loss to follow-up was addressed<br><i>Case-control study</i> —If applicable, explain how matching of cases and controls was addressed<br><i>Cross-sectional study</i> —If applicable, describe analytical methods taking                                                                                                                                                                                           | N/A                                       |

|                          |     | account of sampling strategy                                                                                                                                                                                 |                                |
|--------------------------|-----|--------------------------------------------------------------------------------------------------------------------------------------------------------------------------------------------------------------|--------------------------------|
|                          |     | (e) Describe any sensitivity analyses                                                                                                                                                                        | N/A                            |
| <b>Results</b>           |     |                                                                                                                                                                                                              | <b>Page No<br/>(Line No)</b>   |
| Participants             | 13* | (a) Report numbers of individuals at each stage of study—eg numbers potentially eligible, examined for eligibility, confirmed eligible, included in the study, completing follow-up, and analysed            | Pg 9 (6-7)                     |
|                          |     | (b) Give reasons for non-participation at each stage                                                                                                                                                         | N/A                            |
|                          |     | (c) Consider use of a flow diagram                                                                                                                                                                           | N/A                            |
| Descriptive data         | 14* | (a) Give characteristics of study participants (eg demographic, clinical, social) and information on exposures and potential confounders                                                                     | Pg 9 (7-54)                    |
|                          |     | (b) Indicate number of participants with missing data for each variable of interest                                                                                                                          | N/A                            |
|                          |     | (c) <i>Cohort study</i> —Summarise follow-up time (eg, average and total amount)                                                                                                                             | N/A                            |
| Outcome data             | 15* | <i>Cohort study</i> —Report numbers of outcome events or summary measures over time                                                                                                                          | Pg 10 (14)<br>to Pg 15<br>(23) |
|                          |     | <i>Case-control study</i> —Report numbers in each exposure category, or summary measures of exposure                                                                                                         |                                |
|                          |     | <i>Cross-sectional study</i> —Report numbers of outcome events or summary measures                                                                                                                           |                                |
| Main results             | 16  | (a) Give unadjusted estimates and, if applicable, confounder-adjusted estimates and their precision (eg, 95% confidence interval). Make clear which confounders were adjusted for and why they were included | Pgs 10-15                      |
|                          |     | (b) Report category boundaries when continuous variables were categorized                                                                                                                                    | Pg 7<br>(11-27)                |
|                          |     | (c) If relevant, consider translating estimates of relative risk into absolute risk for a meaningful time period                                                                                             | N/A                            |
| Other analyses           | 17  | Report other analyses done—eg analyses of subgroups and interactions, and sensitivity analyses                                                                                                               |                                |
| <b>Discussion</b>        |     |                                                                                                                                                                                                              |                                |
| Key results              | 18  | Summarise key results with reference to study objectives                                                                                                                                                     | Pg 15 (15-54)                  |
| Limitations              | 19  | Discuss limitations of the study, taking into account sources of potential bias or imprecision. Discuss both direction and magnitude of any potential bias                                                   | Pg 16 (3-20)                   |
| Interpretation           | 20  | Give a cautious overall interpretation of results considering objectives, limitations, multiplicity of analyses, results from similar studies, and other relevant evidence                                   | Pg 16<br>(24) to Pg<br>18 (8)  |
| Generalisability         | 21  | Discuss the generalisability (external validity) of the study results                                                                                                                                        | Pg 18<br>(3) to Pg 19<br>(11)  |
| <b>Other information</b> |     |                                                                                                                                                                                                              |                                |
| Funding                  | 22  | Give the source of funding and the role of the funders for the present study and, if applicable, for the original study on which the present article is based                                                | Pg 19<br>(16-27)               |

1  
2 \*Give information separately for cases and controls in case-control studies and, if applicable, for exposed and  
3 unexposed groups in cohort and cross-sectional studies.

4 **Note:** An Explanation and Elaboration article discusses each checklist item and gives methodological background and  
5 published examples of transparent reporting. The STROBE checklist is best used in conjunction with this article (freely  
6 available on the Web sites of PLoS Medicine at <http://www.plosmedicine.org/>, Annals of Internal Medicine at  
7 <http://www.annals.org/>, and Epidemiology at <http://www.epidem.com/>). Information on the STROBE Initiative is  
8 available at [www.strobe-statement.org](http://www.strobe-statement.org).  
9  
10  
11  
12  
13  
14  
15  
16  
17  
18  
19  
20  
21  
22  
23  
24  
25  
26  
27  
28  
29  
30  
31  
32  
33  
34  
35  
36  
37  
38  
39  
40  
41  
42  
43  
44  
45  
46  
47  
48  
49  
50  
51  
52  
53  
54  
55  
56  
57  
58  
59  
60

For peer review only

# BMJ Open

## Multimorbidity in a marginalised, street-health Australian population: A retrospective cohort study

|                                 |                                                                                                                                                                                                                                                                                                                                                                                                                                                                                                                                                                                                                                                                                                                                          |
|---------------------------------|------------------------------------------------------------------------------------------------------------------------------------------------------------------------------------------------------------------------------------------------------------------------------------------------------------------------------------------------------------------------------------------------------------------------------------------------------------------------------------------------------------------------------------------------------------------------------------------------------------------------------------------------------------------------------------------------------------------------------------------|
| Journal:                        | <i>BMJ Open</i>                                                                                                                                                                                                                                                                                                                                                                                                                                                                                                                                                                                                                                                                                                                          |
| Manuscript ID:                  | bmjopen-2014-005461.R2                                                                                                                                                                                                                                                                                                                                                                                                                                                                                                                                                                                                                                                                                                                   |
| Article Type:                   | Research                                                                                                                                                                                                                                                                                                                                                                                                                                                                                                                                                                                                                                                                                                                                 |
| Date Submitted by the Author:   | 27-Jun-2014                                                                                                                                                                                                                                                                                                                                                                                                                                                                                                                                                                                                                                                                                                                              |
| Complete List of Authors:       | Brett, Tom; University of Notre Dame Australia, General Practice and Primary Health Care Research Unit, School of Medicine<br>Arnold-Reed, Diane; University of Notre Dame Australia, General Practice and Primary Health Care Reserach Unit, School of Medicine; University of Western Australia, School of Population Health<br>Troeung, Lakkhina; University of Notre Dame Australia, General Practicite and Primary Health Care Reserach Unit, School of Medicine<br>Bulsara, Max; University of Notre Dame, Biostatistics<br>Williams, Annalisse; Illawarra Shoalhaven Local Health District,<br>Moorhead, Robert; University of Notre Dame Australia, General Practicite and Primary Health Care Reserach Unit, School of Medicine |
| <b>Primary Subject Heading</b>: | General practice / Family practice                                                                                                                                                                                                                                                                                                                                                                                                                                                                                                                                                                                                                                                                                                       |
| Secondary Subject Heading:      | General practice / Family practice                                                                                                                                                                                                                                                                                                                                                                                                                                                                                                                                                                                                                                                                                                       |
| Keywords:                       | PRIMARY CARE, multimorbidity, chronic disease                                                                                                                                                                                                                                                                                                                                                                                                                                                                                                                                                                                                                                                                                            |
|                                 |                                                                                                                                                                                                                                                                                                                                                                                                                                                                                                                                                                                                                                                                                                                                          |

SCHOLARONE™  
Manuscripts

Only

**TITLE:** Multimorbidity in a marginalised, street-health Australian population – a retrospective cohort study

**CORRESPONDING AUTHOR:**

Prof Tom Brett  
Director  
General Practice and Primary Health Care Research  
School of Medicine  
The University of Notre Dame Australia  
19 Mouat Street, PO Box 1225  
Fremantle, Western Australia 6959

Tel: +61 8 9433 0571

Email: [tom.brett@nd.edu.au](mailto:tom.brett@nd.edu.au)

**CO-AUTHORS:**

1. Associate Professor Diane E Arnold-Reed  
Research and Development Co-ordinator  
General Practice and Primary Health Care Research  
School of Medicine  
The University of Notre Dame Australia  
19 Mouat Street, PO Box 1225  
Fremantle, Western Australia 6959
2. Dr Lakkhina Troeung  
Biostatistical Support Officer  
General Practice and Primary Health Care Research  
School of Medicine  
The University of Notre Dame Australia
3. Professor Max K Bulsara  
Chair in Biostatistics  
Institute for Health Research  
The University of Notre Dame Australia  
19 Mouat Street, PO Box 1225  
Fremantle, Western Australia 6959
4. Dr Annalisse Williams  
Junior Medical Officer and GP Registrar  
Illawarra Shoalhaven Local Health District  
New South Wales, Australia
5. Professor Robert G Moorhead  
Adjunct Professor  
School of Medicine  
The University of Notre Dame Australia  
19 Mouat Street, PO Box 1225  
Fremantle, Western Australia 6959

**Word count** (excluding title page, abstract, references, figures and tables): **4355**

## ABSTRACT

**Objectives:** Demographic and presentation profile of patients using an innovative mobile outreach clinic compared with mainstream practice.

**Design:** Retrospective cohort study.

**Setting:** Primary care mobile street health clinic and mainstream practice in Western Australia.

**Participants:** 2587 street health and 4583 mainstream patients.

**Main outcome measures:** Prevalence and patterns of chronic diseases in anatomical domains across entire age spectrum of patients and disease severity burden using Cumulative Illness Rating Scale (CIRS).

**Results:** Multimorbidity (2+ CIRS domains) prevalence was significantly higher in street health cohort (46.3%, 1199/2587) than age-sex adjusted mainstream estimate (43.1%, 2000/4583),  $p=0.011$ .

Multimorbidity prevalence significantly higher in street health patients <45 years (37.7%, 615/1649) compared to age-sex adjusted mainstream patients (33.0%, 977/2961),  $p=0.003$  but significantly lower if 65+ years (62.0%, 114/184 vs 90.7%, 322/355,  $p<0.001$ ).

Controlling for age and gender, mean CIRS Severity Index score for street health (M = 1.4, SD = 0.91) was significantly higher than mainstream patients (M = 1.1, SD = 0.80),  $p<0.001$ . Furthermore, 44.2% (530/1199) of street health patients had at least one level 3 or 4 score across domains compared to 18.3% (420/2294) for mainstream patients,  $p<0.001$ .

Street health population comprised 29.6% (766/2587) Aboriginal patients with 50.4% (386/766) having multimorbidity compared to 44.6% (813/1821) for non-Aboriginals,  $p=0.007$ . There were no comprehensive data on Indigenous status in mainstream cohort available for comparison.

Musculoskeletal, respiratory and psychiatric domains were most commonly affected with multimorbidity significantly associated with male gender, increasing age and Indigenous status.

**Conclusions:** Age-sex adjusted multimorbidity prevalence and disease severity higher in street health cohort. Earlier onset (23-34 years) multimorbidity found in street health cohort but prevalence is lower in 65+ years than mainstream patients. Multimorbidity prevalence is higher for Aboriginal patients of all ages.



**ARTICLE SUMMARY****Strengths and limitations of the study**

- New information on a vulnerable, street-based population accessing an accredited, mobile outreach medical service.
- The large cohort size (n=2587) involving a total street based population seen over a six year period compared with 4583 mainstream patients from similar catchment area.
- Includes a severity rating for each patient in addition to prevalence and patterns of chronic diseases recorded.
- The open access policy to the street health service could have diluted the proportion of more traditional users of the service because of one-off opportunistic and convenience attendances.
- The street health population is based on data collected over a six year period while the comparator mainstream practice data was collected over six months.

**KEY WORDS**

Multimorbidity, chronic disease, primary healthcare, general practice, severity of illness index

## INTRODUCTION

The combination of multiple chronic diseases (multimorbidity) and poor access to primary health care results in serious social, economic and health consequences[1-5] as well as providing considerable challenges for service providers. Marginalised and homeless people have more chronic diseases, high mortality rates, high direct and indirect healthcare costs[6,7] and poor utilisation of primary care health services.[1,8-11] Alcohol and drug related deaths, smoking related diseases, ischemic heart disease and respiratory diseases are especially common.[9] A systematic review[12] found homeless people in Western countries had much greater drug and alcohol dependence compared to age-matched populations while psychotic illnesses and personality disorders were also more common. Canadian homeless and marginally housed people have 32% probability of survival to 75 years among men and 60% among women with housing a key marker for socioeconomic disadvantage.[9] Death rates among 'rough sleepers' in the United Kingdom are 25 times that of the housed population.[13]

Risk factors influencing access to health services include lack of suitable housing,[9,14] mental health problems,[12,15] poor education, unemployment and lack of regular income.[16,17] Social marginalisation impacts negatively on healthcare utilisation including fear of stigmatisation on visiting mainstream practices and waiting rooms.[18] People from Indigenous, non-English speaking and refugee backgrounds often avoid contact with a regular doctor and only seek help when a crisis develops.[19-21] Such individuals have poorer health outcomes[22] exhibiting patterns of chronic, multimorbid disease at a younger age compared to the general population.[23] In Scotland, Mercer[3] found an increased burden of ill-health and multimorbidity in deprived areas resulting in greater demands on primary health care leading to reduced access, less patient-doctor time and more GP stress but less patient enablement.

The "Freo Street Doctor" is an accredited, street-based mobile health clinic established in 2005 to help meet the needs of marginalised and homeless patients unable or unwilling to access mainstream primary health care. It operates from a number of designated areas within Fremantle and surrounding suburbs in Western Australia. Whilst the target population is mainly marginalised and disadvantaged patients, access to the service is unrestricted with electronic records kept for all attendees. The clinic team consists of general practitioners, nurses, outreach workers, Indigenous health workers and social workers. Our study aims to examine the demographic profile of patients using this street health service compared to mainstream primary care practices, the range and

1  
2  
3  
4  
5  
6  
7  
8  
9  
10  
11  
12  
13  
14  
15  
16  
17  
18  
19  
20  
21  
22  
23  
24  
25  
26  
27  
28  
29  
30  
31  
32  
33  
34  
35  
36  
37  
38  
39  
40  
41  
42  
43  
44  
45  
46  
47  
48  
49  
50  
51  
52  
53  
54  
55  
56  
57  
58  
59  
60

severity of morbidities/chronic diseases across anatomical domains and compares these parameters for Aboriginal and non-Aboriginal patients.

For peer review only

## METHOD

### Study Setting

The entire patient cohort attending the “Freo Street Doctor” service over the period 1 January 2006 to 31 December 2011 was examined. Patient data was entered by reception, medical and nursing staff into standard practice software and stored centrally at Fremantle Medicare Local offices. Data for the study were extracted from the central medical records and compared with the total patient population attending a mainstream general practice clinic[24] servicing the same catchment area over the period 1 July to 31 December 2008.

### Data Extraction

Data extraction was undertaken by two GPs and two medical students, all with similar training and prior experience in the use and application of the Cumulative Illness Rating Scale (CIRS). The scoring of chronic conditions using the validated CIRS has been described in detail previously[20,25] as has the Severity Index (SI) classification.[24]

Briefly, records were reviewed and 42 conditions were scored according to CIRS guidelines: 0 = no problems, 1 = mild problems, 2 = moderate morbidity, 3 = severe chronic problems, 4 = extremely severe functional impairment. Conditions were categorised into 14 anatomical domains. Maximum scores for each domain were added to yield a total score ranging from 0 to 56 for each patient. The total score was then divided by the number of domains with morbidities to generate a CIRS score for each patient ranging from 0 to 4. Severity ratings were defined as 0 = none/low, 1 = mild, 2 = moderate and 3/4 = severe.

For both cohorts conditions within a particular anatomical domain were noted to be present only if the information in the records suggested the condition was ongoing/chronic and then rated according to the CIRS. The street health dataset contained a large number of one-off consultations. Some attendees had no fixed abode with many using drop-in centres as proxy addresses.

As far as possible, data extractors took precautions to guard against double counting. There may have been some limited cross over between street and mainstream practices but, in general, patients attending one service tended to continue doing so.

### Operational Definition

1  
2  
3 Our operational definition of multimorbidity was the co-occurrence of conditions across two or more  
4 (2+) domains in individual patients.[26] After data extraction was completed, a random sample of 30  
5 patients across the entire age spectrum for both clinics was re-assessed to measure consistency  
6 among raters.  
7  
8

### 9 10 11 **Data Analysis**

12 Data analysis was conducted using SPSS 22 (IBM Corporation). All statistical analyses were tested  
13 against an alpha level of 0.05 (two-tailed).  
14

15  
16  
17 Sample characteristics are expressed as means (standard deviation of the mean) for continuous  
18 variables and as frequencies (percentages) for categorical variables. Independent sample t-tests and  
19 Chi-Square tests were used to examine any demographic differences between the two samples.  
20  
21

22  
23  
24 The crude prevalence of multimorbidity was calculated as the number of patients with long-term  
25 conditions in 2+ morbidity domains as a proportion of the total sample. Given significant differences  
26 in age-sex distribution between the two samples, age-sex adjusted prevalence was calculated for the  
27 mainstream sample using direct standardisation to the street health cohort. Chi-square tests were  
28 used to examine prevalence differences between the two cohorts. Patterns of multimorbidity are  
29 expressed as frequencies.  
30  
31  
32

33  
34  
35 In addition to examining age of onset of multimorbidity, we modelled the probability of  
36 multimorbidity as a function of age. First, a logistic regression analysis was run with the presence of  
37 multimorbidity as the dependent variable, and clinic, age, and age squared (given the non-linear  
38 relationship between age and multimorbidity) as independent variables (IV). The regression  
39 coefficients ( $\beta$ ) for each IV were then used to model the probability of multimorbidity as a function  
40 of age in each sample.  
41  
42  
43  
44  
45

46  
47 Multimorbidity severity was examined using the CIRS SI score as well as distribution of patients  
48 within each CIRS severity category. General linear modelling (GLM) was used to examine differences  
49 in multimorbidity severity between the two samples, controlling for age and gender. We also  
50 counted and compared the number of patients with at least one level 3 or 4 score across CIRS  
51 domains,[20] as well as the number of domains with a level 3 or 4 score for each patient as  
52 additional indicators of disease severity.  
53  
54  
55  
56  
57  
58  
59  
60

1  
2  
3 Subgroup analysis was conducted to examine the prevalence and severity of multimorbidity in  
4 Indigenous and non-Indigenous patients in the street health cohort. There was no data on  
5 Indigenous status in the mainstream cohort for comparison.  
6  
7

8  
9 We also examined the relationship between demographic characteristics and the presence of  
10 multimorbidity across 2, 3, and 5 domains using a series of logistic regression analyses.  
11  
12

13  
14 Inter-rater reliability between data extractors was assessed using Cronbach's alpha.  
15  
16

### 17 **Ethics**

18 Ethics approval for the study was obtained from The University of Notre Dame Australia Human  
19 Research Ethics Committee.  
20  
21  
22  
23  
24  
25  
26  
27  
28  
29  
30  
31  
32  
33  
34  
35  
36  
37  
38  
39  
40  
41  
42  
43  
44  
45  
46  
47  
48  
49  
50  
51  
52  
53  
54  
55  
56  
57  
58  
59  
60

## RESULTS

## Patient Characteristics

A total of 2587 patients attended the street health service and 4583 attended mainstream practice over the study periods. The age and gender distribution of patients at both clinics are shown in Table 1. The mean age of street health patients was 37.8 years (SD = 18.7) compared with 36.2 (SD = 21.1) for the mainstream practice. There were no significant differences in age between the two cohorts,  $p=0.055$ , but a significant difference in gender distribution was observed. The majority of the street health patients were male (57.3%, 1482/2587) while the majority of patients attending mainstream practice were female (60.7%, 2783/4583),  $p<0.001$ .

Table 1. Age and Gender Distribution for Study Population

|                              | Fremantle Street Doctor       |                                 |                                      | Mainstream practice<br>( <i>n</i> = 4583) |
|------------------------------|-------------------------------|---------------------------------|--------------------------------------|-------------------------------------------|
|                              | Overall<br>( <i>n</i> = 2587) | Aboriginal<br>( <i>n</i> = 766) | Non-Aboriginal<br>( <i>n</i> = 1821) |                                           |
| Sex, % ( <i>n</i> )          |                               |                                 |                                      |                                           |
| Male                         | 57.3 (1482)                   | 50.3 (385)                      | 60.2 (1097)                          | 39.3 (1800)                               |
| Female                       | 42.7 (1105)                   | 49.7 (381)                      | 39.8 (724)                           | 60.7 (2783)                               |
| Age, mean (SD) [range]       |                               |                                 |                                      |                                           |
| Overall                      | 37.8 (18.7)<br>[0 to 103]     | 32.09 (17.9)<br>[0 to 81]       | 40.19 (18.5)<br>[0 to 103]           | 36.18 (21.1)<br>[0 to 98]                 |
| Male                         | 39.1 (18.5)<br>[0 to 103]     | 31.8 (18.1)<br>[1 to 81]        | 41.6 (17.9)<br>[0 to 103]            | 35.1 (22.3)<br>[0 to 92]                  |
| Female                       | 36.1 (18.7)<br>[0 to 90]      | 32.3 (17.7)<br>[0 to 75]        | 38.0 (18.9)<br>[0 to 90]             | 36.9 (20.3)<br>[0 to 98]                  |
| Age Category, % ( <i>n</i> ) |                               |                                 |                                      |                                           |
| < 25                         | 24.2 (626)                    | 36.8 (282)                      | 18.9 (344)                           | 28.9 (1326)                               |
| 25 to 44                     | 39.5 (1023)                   | 35.8 (274)                      | 41.1 (749)                           | 35.7 (1635)                               |
| 45 to 64                     | 28.3 (732)                    | 24.4 (187)                      | 29.9 (545)                           | 27.1 (1243)                               |
| 65 to 74                     | 5.3 (136)                     | 2.3 (18)                        | 6.5 (118)                            | 4.6 (211)                                 |
| 75+                          | 2.7 (70)                      | 0.7 (5)                         | 3.6 (65)                             | 3.7 (168)                                 |

Aboriginal patients were 29.6% (766/2587) of the street health sample. On average, Aboriginal patients were significantly younger than non-Aboriginal patients, with 36.8% (282/766) under the age of 25 compared with only 18.9% (344/1821) of non-Aboriginals,  $p<0.001$ . The majority of non-Aboriginal patients were male (60.2%, 1097/1821) while there was a more even gender distribution for Aboriginal patients attending the street health service (male 50.3%, 385/766),  $p<0.001$ .

## Inter-rater Reliability

1  
2  
3 Inter-rater reliability between data extractors was tested on CIRS scores and number of domains  
4 with morbidities for 30 randomly selected patients from each of the two cohorts. For the street  
5 health cohort, the intraclass correlation coefficient (ICC) was 0.94 (95% confidence interval 0.89 to  
6 0.97) for number of domains with morbidities and 0.96 (95% CI 0.93 to 0.98) for total CIRS scores  
7 indicating high inter-rater reliability. For the mainstream practice sample, the ICC was 0.98 (95% CI  
8 0.97 to 0.99) for number of domains with morbidities and 0.98 (95% CI 0.97 to 0.99) for CIRS scores.  
9  
10  
11  
12

### 13 **Prevalence of Multimorbidity**

14 Overall, the crude prevalence of multimorbidity was lower in the street health sample.

15 Multimorbidity, based on the presence of conditions affecting 2+ domains, was present in 46.3%  
16 (1199/2587, 95% confidence interval (CI) 44.4 to 48.3%) of street health patients, compared with  
17 50.1% (2294/4583, 95% CI 48.6 to 51.5%) of the mainstream sample,  $p=0.003$ .  
18  
19  
20  
21  
22

23 After direct age-sex adjustment of the mainstream prevalence rates, the prevalence of  
24 multimorbidity was significantly higher in the street health (46.3%, 1199/2587, 95% CI 44.4 to  
25 48.3%) compared with mainstream sample (43.1%, 2000/4583, 95% CI 42.2 to 45.8%),  $p=0.011$ . The  
26 prevalence of multimorbidity in 3+ domains was comparable between the street health (28.0%,  
27 724/2587, 95% CI 26.3 to 29.7%) and mainstream samples (29.2%, 1339/4583, 95% CI 27.9 to  
28 30.5%),  $p=0.269$ . There was also no significant difference in multimorbidity prevalence across 5+  
29 domains between the street health (10%, 259/2587, 95% CI 8.9 to 11.2%) and mainstream (10.5%,  
30 485/4583, 95% CI 9.7 to 11.5%) samples,  $p=0.437$ .  
31  
32  
33  
34  
35  
36  
37

38 Figure 1 shows prevalence of multimorbidity across 2+ domains for the street health and age-sex  
39 adjusted mainstream samples across age groups. The prevalence of multimorbidity among street  
40 health patients aged <45 years (37.3%, 615/1649, 95% CI 34.9 to 39.7%) was significantly higher than  
41 in the adjusted mainstream sample (33.0%, 977/2961, 95% CI 31.3 to 34.7%),  $p=0.003$ .  
42  
43  
44

45 Multimorbidity prevalence was comparable in the 45 to 64 year age group for the street health  
46 (62.0%, 454/732, 95% CI 58.4 to 65.5%) and adjusted mainstream (62.5%, 778/1243, 95% CI 59.9 to  
47 66.2%) samples,  $p=0.825$ . Multimorbidity prevalence was significantly lower in the street health  
48 sample for patients 65+ years (62.0%, 114/184, 95% CI 54.8 to 68.7%) compared to the adjusted  
49 mainstream sample (90.7%, 322/355, 95% CI 87.2 to 93.3%),  $p<0.001$ .  
50  
51  
52  
53

54 Age of onset of multimorbidity was different for the two populations (Figure 2). For street health  
55 patients, the probability of multimorbidity peaked between 61 and 67 years,  $P(E_{\text{STREET HEALTH}})=0.78$ ,  
56  
57  
58  
59  
60



1  
2  
3 and then decreased. For mainstream patients, the probability of multimorbidity increased with age,  
4 with the greatest probability of multimorbidity observed for individuals aged over 70 years,  $P$   
5 ( $E_{\text{MAINSTREAM}}$ )= 0.99. Between the ages of 14 and 43, the probability of multimorbidity was higher for  
6 street health patients,  $P$  ( $E_{\text{STREET HEALTH}}$ ) range 0.26 to 0.71 vs.  $P$  ( $E_{\text{MAINSTREAM}}$ ) range 0.24 to 0.69,  
7 suggesting that younger street health patients are particularly vulnerable to multimorbidity. The  
8 greatest difference was observed between the ages of 23 and 34,  $P$  ( $E_{\text{STREET HEALTH}}$ ) range 0.43 to 0.62  
9 vs.  $P$  ( $E_{\text{MAINSTREAM}}$ ) range 0.33 to 0.52, with street health patients showing a mean 12% greater chance  
10 of multimorbidity than mainstream patients in this age group.  
11  
12  
13  
14  
15  
16

17  
18 Overall for the street health Aboriginal patients, multimorbidity (2+ domains) was present in 50.4%  
19 (386/765, 95% CI 46.9 to 53.9%) compared with 44.6% (813/1821, 95% CI 42.4 to 46.9%) in non-  
20 Aboriginals,  $p=0.007$ . A total of 33.2% of Aboriginal patients (254/766, 95% CI 29.9 to 36.6%) had 3+  
21 domains affected compared with 25.8% (470/1821, 95% CI 23.8 to 27.9%) in non-Aboriginals,  
22  $p<0.001$ , while 13.7% (105/765, 95% CI 11.5 to 16.3%) had 5+ domains affected compared with 8.5%  
23 (154/1821, 95% CI 7.3 to 9.8%) in non-Aboriginals,  $p<0.001$ . Stratified by age, the prevalence of  
24 multimorbidity (2+) across all age groups was significantly higher among Aboriginal compared with  
25 non-Aboriginal patients,  $p<0.001$  (Figure 3).  
26  
27  
28  
29  
30  
31

### 32 **Patterns of Multimorbidity**

33 Table 2 displays the prevalence of the five most common body system domain combinations across  
34 single, 1+, 2+, 3+ and 5+ domains for the street health sample with corresponding prevalence rates  
35 in mainstream practice for comparison. Table 2 also displays the prevalence of the five most  
36 common domain combinations stratified by age.  
37  
38  
39  
40

41 Table 3 displays the prevalence of the five most common domain combinations across single, 1+, 2+,  
42 3+ and 5+ domains stratified by Indigenous status and age.  
43  
44  
45

46 Consistent with the CIRS guidelines, patients with conditions that appeared to be ongoing (for  
47 example, chronic ulcers and non-healing skin infections /lacerations) were included in the  
48 musculoskeletal/integumental domain.  
49  
50  
51  
52  
53  
54  
55  
56  
57  
58  
59  
60

Table 2. Overall and age category breakdown for the 5 most common domains for Street Health cohort

|                                       | Domains                                               | Street Health<br>% (n) | Mainstream<br>practice<br>% (n) <sup>a-d</sup> | Age category (Street health cohort only) |            |            |           |           |
|---------------------------------------|-------------------------------------------------------|------------------------|------------------------------------------------|------------------------------------------|------------|------------|-----------|-----------|
|                                       |                                                       |                        |                                                | < 25                                     | 25 to 44   | 45 to 64   | 65 to 74  | 75+       |
| One domain<br>only<br>(n = 798)       | Musculoskeletal                                       | 29.8 (238)**           | 21.8 (231)                                     | 24.2 (58)                                | 49.2 (117) | 19.7 (47)  | 5.9 (14)  | 0.8 (2)   |
|                                       | Psychiatric                                           | 20.3 (162)             | 18.7 (198)                                     | 20.4 (33)                                | 53.7 (87)  | 24.1 (39)  | 1.9 (3)   | 0         |
|                                       | Eye, ear, nose and throat                             | 13.7 (109)*            | 9.7 (103)                                      | 62.4 (68)                                | 18.3 (20)  | 14.7 (16)  | 0.9 (1)   | 3.7 (4)   |
|                                       | Respiratory                                           | 9.4 (75)               | 17.8 (188)                                     | 38.7 (29)                                | 29.3 (22)  | 30.7 (23)  | 1.3 (1)   | 0         |
|                                       | Genitourinary                                         | 6.9 (55)               | 8.5 (90)                                       | 14.5 (8)                                 | 69.1 (38)  | 14.5 (8)   | 1.8 (1)   | 0         |
| One or more<br>domains<br>(n = 1997)  | Psychiatric                                           | 46.7 (933)**           | 34.6 (1161)                                    | 8.6 (80)                                 | 48.9 (456) | 36.5 (341) | 4.7 (44)  | 1.3 (12)  |
|                                       | Musculoskeletal                                       | 42.9 (856)             | 45.2 (1514)                                    | 13.1 (112)                               | 44.6 (382) | 31.8 (272) | 7.1 (61)  | 3.4 (29)  |
|                                       | Respiratory                                           | 35.0 (699)             | 35.6 (1193)                                    | 11.7 (82)                                | 43.2 (302) | 38.6 (270) | 4.9 (34)  | 1.6 (11)  |
|                                       | Eye, ear, nose and throat                             | 19.1 (381)*            | 22.7 (762)                                     | 29.4 (112)                               | 29.7 (113) | 29.7 (113) | 6.3 (24)  | 5.0 (19)  |
|                                       | Vascular                                              | 18.2 (364)**           | 22.3 (746)                                     | 3.3 (12)                                 | 17.6 (64)  | 53.8 (196) | 13.5 (49) | 11.8 (43) |
| Two or more<br>domains<br>(n = 1199)  | Psychiatric + Respiratory                             | 37.1 (445)**           | 18.8 (432)                                     | 7.2 (32)                                 | 48.3 (215) | 39.1 (174) | 4.3 (19)  | 1.1 (5)   |
|                                       | Psychiatric + Musculoskeletal                         | 32.4 (388)**           | 22.2 (510)                                     | 3.6 (14)                                 | 47.2 (183) | 41.8 (162) | 5.7 (22)  | 1.8 (7)   |
|                                       | Respiratory + Musculoskeletal                         | 25.6 (307)*            | 22.4 (515)                                     | 5.9 (18)                                 | 42.3 (130) | 43.3 (133) | 6.8 (21)  | 1.6 (5)   |
|                                       | Vascular + Musculoskeletal                            | 14.6 (175)**           | 19.4 (445)                                     | 2.3 (4)                                  | 17.7 (31)  | 50.9 (89)  | 15.4 (27) | 13.7 (24) |
|                                       | Hepatic-Pancreatic + Psychiatric                      | 14.3 (172)**           | 2.8 (64)                                       | 1.7 (3)                                  | 45.9 (79)  | 45.9 (79)  | 5.3 (9)   | 1.2 (2)   |
| Three or more<br>domains<br>(n = 724) | Psychiatric + Respiratory + Musculoskeletal           | 30.9 (224)**           | 14.7 (215)                                     | 3.6 (8)                                  | 42.4 (95)  | 47.3 (106) | 5.8 (13)  | 0.9 (2)   |
|                                       | Psychiatric + Haematological + Endocrine              | 14.5 (105)             | 14.1 (206)                                     | 3.8 (4)                                  | 37.1 (39)  | 46.7 (49)  | 8.6 (9)   | 3.8 (4)   |
|                                       | Psychiatric + Respiratory + Vascular                  | 14.4 (104)**           | 8.5 (125)                                      | 2.9 (3)                                  | 25.0 (26)  | 60.6 (63)  | 8.7 (9)   | 2.9 (3)   |
|                                       | Psychiatric + Musculoskeletal + Vascular              | 14.2 (103)             | 13.1 (192)                                     | 1.0 (1)                                  | 18.4 (19)  | 60.2 (62)  | 14.6 (15) | 5.8 (6)   |
|                                       | Psychiatric + Respiratory + Lower<br>Gastrointestinal | 13.8 (100)**           | 5.9 (87)                                       | 1.0 (1)                                  | 46.0 (46)  | 50.0 (50)  | 1.0 (1)   | 2.0 (2)   |

<sup>a</sup> For 1 domain only, denominator (n = 1058), <sup>b</sup> For 1+ domains, denominator (n = 3352), <sup>c</sup> For 2+ domains, denominator (n = 2294), <sup>d</sup> For 3+ domains, denominator (n = 1772)

\* Chi square test significant at .05 level vs mainstream practice

\*\* Chi square test significant at .001 level vs mainstream practice

Table 3. Overall and age category breakdown for the 5 most common domains for Aboriginal Street Health patients

|                                    | Domains                                     | Aboriginal<br>% (n) | Non-Aboriginal<br>% (n) <sup>a-d</sup> | Age category (Aboriginal patients only) |            |            |          |         |
|------------------------------------|---------------------------------------------|---------------------|----------------------------------------|-----------------------------------------|------------|------------|----------|---------|
|                                    |                                             |                     |                                        | < 25                                    | 25 to 44   | 45 to 64   | 65 to 74 | 75+     |
| One domain only<br>(n = 216)       | Musculoskeletal                             | 34.3 (74)           | 28.2 (164)                             | 55.4 (41)                               | 36.5 (27)  | 8.1 (6)    | 0        | 0       |
|                                    | Eye, ear, nose and throat                   | 19.0 (41)*          | 11.7 (68)                              | 85.4 (35)                               | 12.2 (5)   | 2.4 (1)    | 0        | 0       |
|                                    | Psychiatric                                 | 13.0 (28)*          | 23.0 (134)                             | 25.0 (7)                                | 57.1 (16)  | 17.9 (5)   | 0        | 0       |
|                                    | Respiratory                                 | 8.3 (18)            | 9.8 (57)                               | 55.6 (10)                               | 22.2 (4)   | 22.2 (4)   | 0        | 0       |
|                                    | Lower gastrointestinal                      | 6.0 (13)            | 5.0 (29)                               | 30.8 (4)                                | 53.8 (7)   | 15.4 (2)   | 0        | 0       |
| One or more domains<br>(n = 602)   | Musculoskeletal                             | 47.5 (286)*         | 40.9 (570)                             | 25.9 (74)                               | 40.2 (115) | 30.1 (86)  | 3.1 (9)  | 0.7 (2) |
|                                    | Psychiatric                                 | 45.5 (274)          | 47.2 (659)                             | 10.6 (29)                               | 47.8 (131) | 37.2 (102) | 4.0 (11) | 0.4 (1) |
|                                    | Respiratory                                 | 38.7 (233)*         | 33.4 (466)                             | 16.3 (38)                               | 42.5 (99)  | 36.9 (86)  | 3.4 (8)  | 0.9 (2) |
|                                    | Eye, ear, nose and throat                   | 24.9 (150)**        | 16.6 (231)                             | 42.0 (63)                               | 27.3 (41)  | 24.7 (37)  | 4.0 (6)  | 2.0 (3) |
|                                    | Endocrine                                   | 24.4 (147)**        | 13.3 (186)                             | 7.5 (11)                                | 34.0 (50)  | 46.9 (69)  | 8.8 (13) | 2.7 (4) |
| Two or more domains<br>(n = 386)   | Psychiatric + Respiratory                   | 39.6 (153)          | 35.9 (292)                             | 9.8 (15)                                | 47.7 (73)  | 38.6 (59)  | 3.3 (5)  | 0.7 (1) |
|                                    | Psychiatric + Musculoskeletal               | 35.2 (136)          | 31.0 (252)                             | 5.1 (7)                                 | 46.3 (63)  | 44.1 (60)  | 4.4 (6)  | 0       |
|                                    | Respiratory + Musculoskeletal               | 31.3 (121)*         | 22.9 (186)                             | 9.1 (11)                                | 42.1 (51)  | 43.8 (53)  | 4.1 (5)  | 0.8 (1) |
|                                    | Respiratory + Endocrine                     | 20.2 (78)**         | 7.7 (63)                               | 5.1 (4)                                 | 35.9 (28)  | 50.0 (39)  | 7.7 (6)  | 1.3 (1) |
|                                    | Psychiatric + Endocrine                     | 19.2 (74)**         | 10.2 (83)                              | 5.4 (4)                                 | 36.5 (27)  | 47.3 (35)  | 9.5 (7)  | 1.4 (1) |
| Three or more domains<br>(n = 254) | Psychiatric + Respiratory + Musculoskeletal | 35.8 (91)*          | 28.3 (133)                             | 5.5 (5)                                 | 44.0 (40)  | 47.3 (43)  | 3.3 (3)  | 0       |
|                                    | Psychiatric + Haematological + Endocrine    | 22.4 (57)**         | 10.2 (48)                              | 3.5 (2)                                 | 40.4 (23)  | 47.4 (27)  | 7.0 (4)  | 1.8 (1) |
|                                    | Respiratory + Musculoskeletal + Endocrine   | 18.9 (48)**         | 7.4 (35)                               | 2.1 (1)                                 | 31.3 (15)  | 60.4 (29)  | 6.3 (3)  | 0       |
|                                    | Vascular + Respiratory + Endocrine          | 18.5 (47)**         | 6.8 (32)                               | 0                                       | 27.7 (13)  | 63.8 (30)  | 6.4 (3)  | 2.1 (1) |
|                                    | Psychiatric + Vascular + Respiratory        | 18.1 (46)*          | 12.3 (58)                              | 2.2 (1)                                 | 28.3 (13)  | 65.2 (30)  | 2.2 (1)  | 2.2 (1) |

<sup>a</sup> For 1 domain only, denominator (n = 582), <sup>b</sup> For 1+ domains, denominator (n = 1395), <sup>c</sup> For 2+ domains, denominator (n = 813), <sup>d</sup> For 3+ domains, denominator (n = 470)

\* Chi square test significant at .05 level vs Non-Aboriginal

\*\* Chi square test significant at .001 level vs Non-Aboriginal

### Multimorbidity Severity Index

Overall, GLM analysis revealed a significantly greater severity of disease among the street health cohort. Controlling for age and gender, street health patients ( $M = 1.4$ ,  $SD = .91$ ) had significantly higher multimorbidity severity than mainstream patients ( $M = 1.1$ ,  $SD = .80$ ),  $p < 0.001$ .

A significantly greater proportion of the street health patients were represented in the moderate (34.1%, 883/2587, 95% CI 32.3 to 35.9%),  $p < 0.001$ , and severe categories (4.9%, 126/2587, 95% CI 4.1 to 5.8%),  $p < 0.001$ , compared with mainstream patients (moderate: 21.0%, 961/4583, 95% CI 19.8 to 22.2%; severe: 1.2%, 53/4583, 95% CI, 0.9 to 1.5%). When multimorbidity severity was stratified by age (Figure 4), a greater proportion of street health patients were again represented in the moderate and severe categories across every age category.

Overall, 24.4% (632/2587) of street health patients compared to 10.1% (463/4583) of mainstream patients had at least one level 3 or level 4 score across domains,  $p < 0.001$ . For patients with multimorbidity, this was 44.2% (530/1199) for street health cohort vs 18.3% (420/2294) of mainstream patients,  $p < 0.001$ .

Figure 5 shows the frequency trends of number of domains with level 3 or 4 scores[20] for patients with multimorbidity across 2+ domains for both cohorts, revealing a more pronounced and earlier onset of increased disease burden in the 25-44 and 45-64 year age group for street health patients but especially Aboriginal patients.

For the street health cohort, Aboriginal patients scored marginally higher on the CIRS Severity Index ( $M = 1.39$ ,  $SD = 0.89$ ) compared with non-Aboriginal patients ( $M = 1.34$ ,  $SD = 0.91$ ), although this difference was not statistically significant,  $p = 0.610$ .

### Factors Associated with Multimorbidity

Logistic regression analyses using the occurrence of multimorbidity across 2+, 3+ and 5+ domains as the criterion variable showed multimorbidity to be significantly associated with male gender, increasing age and Indigenous status (Table 4). Indigenous status was the strongest predictor of multimorbidity in each model. Aboriginal patients had an 87% increase in the likelihood of displaying multimorbidity across 2+ domains compared with non-Aboriginals. Aboriginal patients were also twice as likely to show multimorbidity across 3+ domains and nearly three times more likely to show multimorbidity across 5+ domains.

**Table 4. Relation between socio-demographic characteristics and the prevalence of multimorbidity**

| Characteristic    | Odds ratio | 95% CI       |
|-------------------|------------|--------------|
| <b>2+ Domains</b> |            |              |
| Male*             | 1.44       | 1.22 to 1.70 |
| Age *             | 1.01       | 1.04 to 1.05 |
| Indigenous*       | 1.87       | 1.55 to 2.26 |
| <b>3+ Domains</b> |            |              |
| Male*             | 1.41       | 1.17 to 1.70 |
| Age*              | 1.04       | 1.04 to 1.05 |
| Indigenous*       | 2.17       | 2.17 to 2.66 |
| <b>5+ Domains</b> |            |              |
| Male*             | 1.26       | 0.96 to 1.67 |
| Age*              | 1.05       | 1.04 to 1.06 |
| Indigenous*       | 2.82       | 2.11 to 3.77 |

\*  $p < .001$ 

## DISCUSSION

Research on multimorbidity among street health populations is scarce with little data available on patterns, prevalence or disease severity among particular age or ethnic groups. Existing research has tended to focus on specific areas, such as homelessness and mental health,[27-29] with little attention on the cumulative and synergistic effects of multiple chronic conditions or a broader biopsychosocial approach to health care needs.[4,30] The prevalence of multimorbidity is higher in deprived as opposed to more affluent areas[3,31] with multiple physical diseases often co-existing among patients with mental illness.[4,31,32]

This is the first study to use 42 conditions affecting anatomical domains to estimate patterns and prevalence of multimorbidity among marginalised and homeless patients attending a designated, primary care-run, street-based outreach service. Like our earlier mainstream practices study,[24] we include an estimation of disease severity to enhance the overall picture of multimorbidity burden in this population.

Key findings from our study include that multimorbidity is significantly associated with male gender, increasing age and Indigenous status with the latter the strongest predictor of multimorbidity irrespective of whether 2+, 3+ or 5+ domains are used as the criterion variable.

### Strengths and limitations of the study

1  
2  
3 The strengths of this study include the large street health cohort size involving the total population  
4 seen over a six year period and the fact that we include a disease severity rating for each patient in  
5 addition to prevalence and patterns data recorded.  
6  
7

8  
9 A major difficulty we encountered was enumerating the homeless population mainly because it  
10 lacked a common definition.[33] The open access policy to the street health service could have had a  
11 diluting effect on the proportion of more traditional users of the service because of one-off  
12 opportunistic and convenience attendances. Among street health patients, 22.8% had no  
13 multimorbidity compared with 26.9% among mainstream patients.  
14  
15

16  
17 Our method of estimation of multimorbidity relies on the accrual of formal diagnoses of conditions  
18 which in turn partly relies on regular attendance with care providers. Hence, the transient nature of  
19 the street health cohort may have impact on the estimation of multimorbidity compared to the  
20 more stable mainstream cohort.  
21  
22  
23  
24

25  
26  
27 In addition, whilst the street health population is based on data collected over a six year period, the  
28 comparator mainstream practice data was collected over six months.[24]  
29  
30

31 Chronic skin ulcers and slow to heal lacerations/infections were prominent in street cohort  
32 compared to mainstream reflecting the reality of their poor living circumstances and hygiene.  
33 Inclusion of these conditions as part of the musculoskeletal/integumental domain was based on  
34 their recurrent, chronic presentations in this population and is likely to have increased the overall  
35 prevalence of this domain. It was not possible to estimate proportion of  
36 musculoskeletal/integumental domain that related to chronic skin problems.  
37  
38  
39  
40  
41  
42  
43  
44

#### 45 **Prevalence and patterns**

46  
47 Multimorbidity prevalence among the street health cohort was significantly higher than the age-sex  
48 adjusted prevalence for the mainstream cohort. The age breakdown across 2+ domains shows  
49 younger patients as much more vulnerable to having multiple chronic conditions with a 12% greater  
50 likelihood among 23 - 34 year old patients. This contrasts with findings from our earlier research  
51 where prevalence patterns progressively increased from the 25 – 44 year age group to the 45 – 64  
52 and 65 -74 year age groups[24] and results in the flatter trajectory of the S-shaped distribution curve  
53 as seen in Figure 1. The reason for multimorbidity peaking in the 25 - 44 year age group in the street  
54 health population could be explained by the premature deaths of these patients or the possibility  
55  
56  
57  
58  
59  
60

1  
2  
3 that those surviving to older age start attending mainstream practices or become institutional  
4 residents.  
5

6  
7 A key finding from our study is the willingness of Aboriginal patients to attend the street health  
8 service - 29.6% v. 1.6% to Australian primary care practices[34] – and that Aboriginal patients overall  
9 are significantly younger – 36.8% v. 18.9% under 25 years old - than non-Aboriginal patients. Due to  
10 a lack of data on Indigenous status amongst the mainstream practice, it was not possible to compare  
11 both cohorts. Among the street health population, Aboriginal patients have significantly higher rates  
12 of multimorbidity across all age groups and number of domains affected.  
13  
14

15  
16  
17 The high prevalence of psychiatric morbidity (46.7%) was not unexpected. The three most common  
18 domains - psychiatric, musculoskeletal (42.9%) and respiratory (35.0%) - are similar to mainstream  
19 except that psychiatry and musculoskeletal are juxtaposed.[24] These three domains remain most  
20 common even when 2+ or 3+ domains are examined and may act to facilitate or accelerate other  
21 morbidities resulting in premature ageing or progressive deterioration.  
22  
23

24  
25  
26 The possibility that early onset of psychiatric illness may in turn contribute to a cascade of  
27 homelessness, lack of stable relationships and failure to achieve educational potential should be  
28 considered.  
29  
30  
31

### 32 33 34 **Disease severity**

35  
36  
37 Disease severity burden is of particular value in disadvantaged populations because the cumulative  
38 and synergistic nature of their multimorbidities impacts on their need for appropriate health  
39 services[30] while their socioeconomic circumstances renders their access to such services  
40 inequitable. American,[10] Canadian[9] and British[12,13] studies have all found much common  
41 ground with housing, mental illness, poor education and smoking common factors throughout.  
42 Complex interventions invariably do better when housing is integrated into the solution and the  
43 importance of social geography and family supports acknowledged.[7] There is no definitive answer  
44 but well integrated support networks built around primary care services would appear a logical way  
45 forward.  
46  
47  
48  
49  
50

51  
52  
53  
54 We found the multimorbidity SI significantly higher for street health patients, more pronounced with  
55 'moderate' and 'severe' morbidity and persisting across all age categories. Given the large numbers  
56 in the two population cohorts, the relatively small but significant differences of 13% in the  
57  
58  
59  
60

1  
2  
3 moderately severe and 4% in the severe disease severity index categories translate to a substantial  
4 number of patients. The impost in terms of service delivery could therefore be greater than is  
5 primarily evident. Taken together with the fact that the presence of multiple severe or moderately  
6 severe chronic conditions is not compatible with long-term survival or management in the primary  
7 care setting especially amongst a marginalised, street health population, it is likely to impact directly  
8 on Emergency Department visits and hospital admissions.  
9

10  
11  
12  
13 After age-sex adjustment, multimorbidity prevalence is significantly higher among the street health  
14 cohort. Where disease exists, it tends to be of significantly greater severity as reflected by the more  
15 pronounced domain level 3 and level 4 scores. This supports earlier research by Starfield and  
16 Kinder[35] that morbidities are not randomly distributed amongst populations. Instead, those with  
17 the highest vulnerability to illness have a greater disadvantage because the clustering of morbidities  
18 in these sub-populations diminishes their quality of life.[3] Multimorbidity in such circumstances  
19 impacts negatively not just on their functioning status[36,37] but also causes increased and poorly  
20 co-ordinated use of health services,[5] increased direct and indirect healthcare costs[6] and  
21 heightens the risk of premature death.[38,39]  
22  
23  
24  
25  
26  
27  
28  
29  
30

### 31 **Conclusion**

32  
33  
34 Our study reports on the prevalence, patterns and disease severity of multimorbidity among a  
35 marginalised population attending a primary care-led, street health clinic in Western Australia.  
36 Overall, the probability of early onset (23-34 years) multimorbidity is higher in the street health  
37 cohort compared with mainstream practice but not in patients aged over 45 years with psychiatric,  
38 musculoskeletal and respiratory the commonest domains affected. For Aboriginal patients, the  
39 prevalence of multimorbidity is higher across all ages but especially if aged < 25 years.  
40  
41  
42

43  
44 Disease severity is significantly higher in the street health population, especially Aboriginal patients,  
45 with greater 'moderate' and 'severe' morbidity and persists across all age categories. Attendance  
46 patterns for Aboriginal patients suggest they are more likely to engage with street-based, outreach  
47 service than mainstream practice. Reasons for this increased engagement warrant further  
48 investigation.  
49  
50  
51

52  
53 Our findings have implications on the design and delivery of health care services to meet the  
54 increasing challenge of multimorbidity[4,40] in disadvantaged and Indigenous populations.  
55 Traditional approaches to service delivery fail to meet the needs of this population.[12] Such  
56 services need more complex interventions but are unlikely to receive appropriate health services  
57  
58  
59  
60



1  
2  
3 expenditure and compare unfavourably with that offered to mainstream patients. A more integrated  
4 outreach approach involving better housing, psychiatric, education and social supports would seem  
5 logical to address their needs. Longer term prospective studies including an economic analysis  
6 component would be helpful.  
7  
8  
9

#### 10 **WHAT THIS PAPER ADDS:**

##### 11 **What is already known on this subject**

12  
13 Marginalised and homeless people have more chronic diseases, high mortality rates, high direct and  
14 indirect health care costs and generally make poor utilisation of available health services. Mental  
15 illness, drug and alcohol abuse are especially common in homeless people. The Inverse Care Law[11]  
16 ensures that those in greatest need generally receive the least treatment.  
17  
18  
19  
20  
21

##### 22 **What this study adds**

23  
24 Our study shows multimorbidity amongst street health patients is common, more severe and exists  
25 across all anatomical domains with younger patients (23-34 year olds) and Aboriginal patients  
26 especially vulnerable. Among the street health population, multimorbidity is significantly associated  
27 with male gender, increasing age and Indigenous status. Aboriginal patients comprise 29.6% of the  
28 street health cohort which compares favourably with the 1.6% attending mainstream Australian  
29 practices and offers hope for greater engagement of basic health services into the future.  
30  
31  
32  
33  
34  
35  
36  
37  
38  
39  
40  
41  
42  
43  
44  
45  
46  
47  
48  
49  
50  
51  
52  
53  
54  
55  
56  
57  
58  
59  
60

## ACKNOWLEDGEMENTS

We acknowledge the assistance of the staff at the Freo Street Doctor clinic, Fremantle Medicare Local and the medical practice involved in the study. We acknowledge the assistance of Drs Maeve Kiely and Cam Phan with data acquisition. Research support was received from The Australian Commonwealth Government Primary Health Care Research Evaluation and Development (PHCRED) Strategy Phase 2. The General Practice and Primary Health Care Research Unit is partly funded under the Collaborative Research Network (CRN) Program Grant from the Australian Government Department of Education to the University of Notre Dame Australia. We also acknowledge financial support from J Galvin, W Cunningham, L Ryan and A Neale.

## CONFLICT DISCLOSURE

All authors have completed the ICMJE uniform disclosure form at [www.icmje.org/coi\\_disclosure.pdf](http://www.icmje.org/coi_disclosure.pdf) and declare: TB, DAR, LT and RGM have received research grant funding; DAR has received support from research donations; no other relationships or activities that could appear to have influenced the submitted work.

## DATA SHARING STATEMENT

No additional data are available

## CONTRIBUTORS

TB and DAR made substantial contributions to the conception and design of the work as well as the acquisition, analysis and interpretation of data for the study.

LT and MB made substantial contributions to the analysis and interpretation of data.

RGM made substantial contributions to the acquisition of data.

TB, DAR and LT were responsible for drafting the manuscript and all authors revised it critically for important intellectual content, final approval of the version to be published and agree to be accountable for all aspects of the work in ensuring that questions related to the accuracy or integrity of any part of the work are appropriately investigated and resolved.

**REFERENCES**

1. Barnett K, Mercer SW, Norbury M, et al. Epidemiology of multimorbidity and implications for health care, research, and medical education: a cross-sectional study. *Lancet* 2012;**380**:37-43 doi: 10.016/S0140-6736(12)60240-2.
2. Fortin M, Lapointe L, Hudon C, et al. Multimorbidity and quality of life in primary care: a systematic review. *Health and Quality of Life Outcomes* 2004;**2**:51.
3. Mercer S, Watt G. The Inverse Care Law: Clinical primary care encounters in deprived and affluent areas of Scotland. *Ann Fam Med* 2007;**5**:503-10.
4. Payne R, Gray A, Guthrie B, et al. The effect of physical multimorbidity, mental health conditions and socioeconomic deprivation on unplanned admissions to hospital: a retrospective cohort study. *CMAJ* 2013;**185**(5):E221-8 doi: 10.1503/cmaj.121349.
5. Salisbury C, Johnson L, Purdy S, et al. Epidemiology and impact of Multimorbidity in primary care: a retrospective cohort study. *Br J Gen Pract* 2011;**61**:18-24.
6. Hoffman C, Rice D, Hai-Yen S. Persons with chronic conditions - their prevalence and costs. *JAMA* 1996;**276**:1473-79.
7. Sadowski L, Kee R, VanderWeele T, et al. Effect of a housing and case management program on emergency department visits and hospitalizations among chronically ill homeless adults. *JAMA* 2009;**301**:1771-8.
8. Glynn L, Valderas JM, Healy P, et al. The prevalence of Multimorbidity in primary care and its effect on health care utilisation and cost. *Fam Pract* 2011(28):516-23 doi: 10.1093/fampra/cmr013.
9. Hwang S, Wilkins R, Tjepkema M, et al. Mortality among residents of shelters, rooming houses, and hotels in Canada: 11 year follow-up study. *BMJ* 2009;**339**:b4036 doi: 10.1136/bmj.b4036.
10. Lantz P, House J, Lepkowski J, et al. Socioeconomic factors, health behaviors, and mortality: results from a nationally representative prospective study of US adults. *JAMA* 1998;**279**:1703-08.
11. Tudor-Hart J. The inverse care law. *Lancet* 1971;**1**:405-12.
12. Fazel S, Khosla V, Doll H, et al. The prevalence of mental disorders among the homeless in western countries: systematic review and meta-regression analysis. *PLoS Medicine* 2008;**5**(12):e225 doi: 10.1371/journal.pmed.0050225
13. Shaw M, Dorling D, Brimblecombe N. Life chances in Britain by housing wealth and for the homeless and vulnerably housed. *Environment and Planning A* 1999;**31**:2239-48.
14. Riley A, Harding G, Underwood M, et al. Homelessness: a problem for primary care? . *Br J Gen Pract* 2003;**55**:474-79.

- 1  
2  
3 15. Gunn JM, Ayton DR, Densley K, et al. The association between chronic illness, multimorbidity and  
4 depressive symptoms in an Australian primary care cohort. *Social Psychiatry and Psychiatric*  
5 *Epidemiology* 2012;**47**:175-84.
- 6  
7 16. Bloch G, Rozmovits L, Giambrone B. Barriers to primary care responsiveness to poverty as a risk  
8 factor for health. *BMC Family Practice* 2011;**12**:62 doi: 10.1186/1471-2296-12-62.
- 9  
10 17. Gelberg L, Gallagher T, Andersen R, et al. Competing priorities as a barrier to medical care among  
11 homeless adults in Los Angeles. *Am J Public Health* 1997;**87**:217-20.
- 12  
13 18. Jeal N, Salisbury C. Self reported experiences of health services among female street-based  
14 prostitutes: a cross sectional survey. *Br J Gen Pract* 2004;**54**:215-19.
- 15  
16 19. Cummings M, Kang M. Youth health services - improving access to primary care. *Australian*  
17 *Family Physician* 2012;**41**:339-41.
- 18  
19 20. Miller MD, Paradis CF, Houck PR, et al. Rating Chronic Medical Illness Burden in Geropsychiatric  
20 Practice and Research: Application of the Cumulative Illness Rating Scale *Psychiatric Res*  
21 *1992*;**41**:237-48 doi: [http://dx.doi.org/10.1016/0165-1781\(92\)90005-N](http://dx.doi.org/10.1016/0165-1781(92)90005-N).
- 22  
23 21. Murray S, Skull S. Hurdles to health: immigrant and refugee health care in Australia. . *Aus Health*  
24 *Rev* 2005;**29**:25-29.
- 25  
26 22. Parslow R, Jorm A, Christensen H, et al. Factors associated with young adults obtaining general  
27 practitioner services. . *Aus Health Rev* 2002;;**25**:109-17.
- 28  
29 23. Shadmi E. Multimorbidity and equity in health. *International J for Equity in Health* 2013;**12**:59  
30 doi: doi:10.1186/1475-9276-12-59.
- 31  
32 24. Brett T, Arnold-Reed D, Popescu A, et al. Multimorbidity in patients attending 2 Australian  
33 primary care practices. *Ann Fam Med* 2013;**11**:535-42 doi: 10.1370/afm.1570.
- 34  
35 25. Hudon C, Fortin M, Soubhi H. Abbreviated guidelines for scoring Cumulative Illness Rating Scale  
36 (CIRS) in family practice. *J Clin Epidemiol* 2007;**60**:212.
- 37  
38 26. O'Halloran J, Miller G, Britt H. Defining chronic conditions for primary care with ICPC-2. *Fam*  
39 *Pract* 2004;**21**:381-86.
- 40  
41 27. Hermann H, Evert H, Harvey C, et al. Disability and service use among homeless people living  
42 with psychotic disorders. *Aust NZ J Psychiatry* 2004;**38**:965-74.
- 43  
44 28. Teesson M, Hodder T, Buhrich N. Psychiatric disorders in homeless men and women in inner  
45 Sydney. *Aust NZ J Psychiatry* 2004;**38**:162-68.
- 46  
47 29. Trevena L, Nutbeam D, Simpson J. Asking the right questions of disadvantaged and homeless  
48 communities: the role of housing, patterns of illness and reporting behaviours in the  
49 measurement of health status. *Aust NZ J Public Health* 2001;**25**:298-304.
- 50  
51  
52  
53  
54  
55  
56  
57  
58  
59  
60

- 1  
2  
3 30. Bayliss E, Ellis J, Steiner J. Seniors' self-reported multimorbidity captured biopsychosocial factors  
4 not incorporated into two other data-based morbidity measures. *J Clin Epidemiol*  
5 2009;**62**:550-57.  
6  
7  
8 31. Orueta J, Nuno-Solinis R, Garcia-Alvarez A, et al. Prevalance of multimorbidity according to the  
9 deprivation level among the elderly in the Basque Country. *BMC Public Health* 2013;**13**:918.  
10  
11 32. Andrade L, Bensenor I, Viana M, et al. Clustering of psychiatric and somatic illnesses in the  
12 general population: multimorbidity and socioeconomic correlates. *Braz J Med* 2010;**43**:483-  
13 91.  
14  
15  
16 33. Fitzpatrick-Lewis D, Ganann R, Krisnaratne S, et al. Effectiveness of interventions to improve the  
17 health and housing status of homeless people: a rapid systematic review. *BMC Public Health*  
18 2011;**11**:638.  
19  
20  
21 34. Britt H, Miller G, Charles J, et al. A decade of Australian general practice activity 2002-03 to 2011-  
22 12. General practice series. Sydney: Sydney University Press, 2012.  
23  
24 35. Starfield B, Kinder K. Multimorbidity and its measurement. *Health Policy* 2011;**103**:3-8.  
25  
26 36. Bayliss E, Bayliss M, Ware J, et al. Predicting declines in physical function in persons with multiple  
27 chronic conditions: what we can learn from the medical problem list. *Health and Quality of*  
28 *Life Outcomes* 2004;**2**:47-51.  
29  
30  
31 37. Lawson K, Mercer S, Wyke S, et al. Double trouble: the impact of Multimorbidity and deprivation  
32 on preference-weighted health related quality of life - a cross-sectional analysis of the  
33 Scottish Health Survey. *International J for Equity in Health* 2013;**12**:12: 67 doi:  
34 10.1186/1475-9276-12-67.  
35  
36  
37 38. Gijzen R, Hoeymans N, Schellevis F, et al. Causes and consequences of comorbidity: A review. *J*  
38 *Clin Epidemiol* 2001;**54**:661-74.  
39  
40  
41 39. Yancik R, Wesley M, Ries L, et al. Comorbidity and age as predictors of risk for early mortality of  
42 male and female colon carcinoma patients: a population based study. *Cancer* 1998;**82**:2123-  
43 34.  
44  
45  
46 40. Tinetti M, Fried T, Boyd C. Designing health care for the most common chronic condition -  
47 multimorbidity. *JAMA* 2012:2493-94.  
48  
49  
50  
51  
52  
53  
54  
55  
56  
57  
58  
59  
60

**FIGURE LEGENDS**

**Figure 1.** Prevalence of multimorbidity within age groups with 95% confidence intervals

**Figure 2.** Probability of multimorbidity (2+ domains) as a function of age

**Figure 3.** Prevalence of multimorbidity in Street Health sample stratified by age and Indigenous status with 95% confidence intervals

**Figure 4.** Severity Index distribution within age groups

**Figure 5.** Frequency trends of number of domains with level 3 or 4 scores

**TITLE:** Multimorbidity in a marginalised, street-health Australian population – a retrospective cohort study

**CORRESPONDING AUTHOR:**

Prof Tom Brett  
Director  
General Practice and Primary Health Care Research  
School of Medicine  
The University of Notre Dame Australia  
19 Mouat Street, PO Box 1225  
Fremantle, Western Australia 6959

Tel: +61 8 9433 0571

Email: [tom.brett@nd.edu.au](mailto:tom.brett@nd.edu.au)

**CO-AUTHORS:**

1. Associate Professor Diane E Arnold-Reed  
Research and Development Co-ordinator  
General Practice and Primary Health Care Research  
School of Medicine  
The University of Notre Dame Australia  
19 Mouat Street, PO Box 1225  
Fremantle, Western Australia 6959  
and  
Centre for Health Services Research,  
School of Population Health,  
University of Western Australia, 35  
Stirling Highway, Crawley Western  
Australia 6009
2. Dr Lakkhina Troeung  
Biostatistical Support Officer  
General Practice and Primary Health Care Research  
School of Medicine  
The University of Notre Dame Australia
3. Professor Max K Bulsara  
Chair in Biostatistics  
Institute for Health Research  
The University of Notre Dame Australia  
19 Mouat Street, PO Box 1225  
Fremantle, Western Australia 6959
4. Dr Annalisse Williams  
Junior Medical Officer and GP Registrar  
Illawarra Shoalhaven Local Health District  
New South Wales, Australia
5. Professor Robert G Moorhead  
Adjunct Professor  
School of Medicine  
The University of Notre Dame Australia  
19 Mouat Street, PO Box 1225  
Fremantle, Western Australia 6959

**Word count** (excluding title page, abstract, references, figures and tables): **3,829,435**

## ABSTRACT

**Objectives:** Demographic and presentation profile of patients using an innovative mobile outreach clinic compared with mainstream practice.

**Design:** Retrospective cohort study.

**Setting:** Primary care mobile street health clinic and mainstream practice in Western Australia.

**Participants:** 2587 street health and 4583 mainstream patients.

**Main outcome measures:** Prevalence and patterns of chronic diseases in anatomical domains across entire age spectrum of patients and disease severity burden using Cumulative Illness Rating Scale (CIRS).

**Results:** ~~Lower~~ ~~mM~~multimorbidity (2+ CIRS domains) prevalence was significantly higher in street health cohort (46.3%, 1199/2587) than ~~mainstream (50.1%, 2294/4583), p=0.003 when comparing crude estimates but significantly higher when comparing with direct~~ age-sex adjusted -mainstream estimate (43.1%, 2000/4583),  $p=0.011$ .

~~Higher multimorbidity~~ Multimorbidity prevalence significantly higher in street health patients <45 years (37.7%, 615/1649) compared to age-sex adjusted mainstream patients (33.0%, 977/2961),  $p=0.003$  (34.3%, 1017/2961),  $p=0.045$  but significantly lower if 45-65 years (62.0%, 114/184 62.3%, 584/938 vs 90.7%, 322/355 78.7%, 1277/1622,  $p<0.001$ ).

~~Street health patients showed significantly greater disease severity.~~ Controlling for age and gender, mean CIRS Severity Index score for street health (M = 1.4, SD = 0.91) was significantly higher than mainstream patients (M = 1.1, SD = 0.80),  $p<0.001$ . Furthermore, 44.2% (530/1199) of street health patients had at least one level 3 or 4 score across domains compared to 18.3% (420/2294) ~~of~~ for mainstream patients,  $p<0.001$ .

~~Aboriginal patients were 29.6% (766/2587) of s~~Street health population comprised 29.6% (766/2587) Aboriginal patients with 50.4% (386/766) having multimorbidity ~~vs-compared to~~ 44.6% (813/1821) for non-Aboriginals,  $p=0.007$ . There were no ~~no~~ comprehensive data on Indigenous status in mainstream cohort available for comparison.

Musculoskeletal, respiratory and psychiatric domains were most commonly affected with multimorbidity significantly associated with male gender, increasing age and Indigenous status.



1  
2  
3  
4  
5  
6  
7  
8  
9  
10  
11  
12  
13  
14  
15  
16  
17  
18  
19  
20  
21  
22  
23  
24  
25  
26  
27  
28  
29  
30  
31  
32  
33  
34  
35  
36  
37  
38  
39  
40  
41  
42  
43  
44  
45  
46  
47  
48  
49  
50  
51  
52  
53  
54  
55  
56  
57  
58  
59  
60

**Conclusions:** Age-sex adjusted multimorbidity- prevalence -and disease severity -higher in street health cohort-. ~~Early~~Earlier onset (23-34 years) multimorbidity ~~is higher~~found in street health cohort but prevalence is lower in ~~45~~65+ years than mainstream patients. Multimorbidity prevalence is higher for Aboriginal patients of all ages.

For peer review only

**ARTICLE SUMMARY****Strengths and limitations of the study**

- New information on a vulnerable, street-based population accessing an accredited, mobile outreach medical service.
- The large cohort size (n=2587) involving a total street based population seen over a six year period compared with 4583 mainstream patients from similar catchment area.
- Includes a severity rating for each patient in addition to prevalence and patterns of chronic diseases recorded.
- The open access policy to the street health service could have diluted the proportion of more traditional users of the service because of one-off opportunistic and convenience attendances.
- The street health population is based on data collected over a six year period while the comparator mainstream practice data was collected over six months.

**KEY WORDS**

Multimorbidity, chronic disease, primary healthcare, general practice, severity of illness index

## INTRODUCTION

The combination of multiple chronic diseases (multimorbidity) and poor access to primary health care results in serious social, economic and health consequences[1-5] as well as providing considerable challenges for service providers. Marginalised and homeless people have more chronic diseases, high mortality rates, high direct and indirect healthcare costs[6,7] and poor utilisation of primary care health services.[1,8-11] Alcohol and drug related deaths, smoking related diseases, ischemic heart disease and respiratory diseases are especially common.[9] A systematic review[12] found homeless people in Western countries had much greater drug and alcohol dependence compared to age-matched populations while psychotic illnesses and personality disorders were also more common. Canadian homeless and marginally housed people have 32% probability of survival to 75 years among men and 60% among women with housing a key marker for socioeconomic disadvantage.[9] Death rates among 'rough sleepers' in the United Kingdom are 25 times that of the housed population.[13]

Risk factors influencing access to health services include lack of suitable housing,[9,14] mental health problems,[12,15] poor education, unemployment and lack of regular income.[16,17] Social marginalisation impacts negatively on healthcare utilisation including fear of stigmatisation on visiting mainstream practices and waiting rooms.[18] People from Indigenous, non-English speaking and refugee backgrounds often avoid contact with a regular doctor and only seek help when a crisis develops.[19-21] Such individuals have poorer health outcomes[22] exhibiting patterns of chronic, multimorbid disease at a younger age compared to the general population.[23] In Scotland, Mercer[3] found an increased burden of ill-health and multimorbidity in deprived areas resulting in greater demands on primary health care leading to reduced access, less patient-doctor time and more GP stress but less patient enablement.

The "Freo Street Doctor" is an accredited, street-based mobile health clinic established in 2005 to help meet the needs of marginalised and homeless patients unable or unwilling to access mainstream primary health care. It operates from a number of designated areas within Fremantle and surrounding suburbs in Western Australia. Whilst the target population is mainly marginalised and disadvantaged patients, access to the service is unrestricted with electronic records kept for all attendees. The clinic team consists of general practitioners, nurses, outreach workers, Indigenous health workers and social workers. Our study aims to examine the demographic profile of patients using this street health service compared to mainstream primary care practices, the range and

1  
2  
3 severity of morbidities/chronic diseases across anatomical domains and compares these parameters  
4  
5 for Aboriginal and non-Aboriginal patients.  
6  
7  
8  
9  
10  
11  
12  
13  
14  
15  
16  
17  
18  
19  
20  
21  
22  
23  
24  
25  
26  
27  
28  
29  
30  
31  
32  
33  
34  
35  
36  
37  
38  
39  
40  
41  
42  
43  
44  
45  
46  
47  
48  
49  
50  
51  
52  
53  
54  
55  
56  
57  
58  
59  
60

For peer review only

## METHOD

### Study Setting

The entire patient cohort attending the “Freo Street Doctor” service over the period 1 January 2006 to 31 December 2011 was examined. Patient data was entered by reception, medical and nursing staff into standard practice software and stored centrally at Fremantle Medicare Local offices. Data for the study were extracted from the central medical records and compared with the total patient population attending a mainstream general practice clinic[24] servicing the same catchment area over the period 1 July to 31 December 2008.

### Data Extraction

Data extraction was undertaken by two GPs and two medical students, all with similar training and prior experience in the use and application of the Cumulative Illness Rating Scale (CIRS). The scoring of chronic conditions using the validated CIRS has been described in detail previously[20,25] as has the Severity Index (SI) classification.[24]

Briefly, records were reviewed and 42 conditions were scored according to CIRS guidelines: 0 = no problems, 1 = mild problems, 2 = moderate morbidity, 3 = severe chronic problems, 4 = extremely severe functional impairment. Conditions were categorised into 14 anatomical domains. Maximum scores for each domain were added to yield a total score ranging from 0 to 56 for each patient. The total score was then divided by the number of domains with morbidities to generate a CIRS score for each patient ranging from 0 to 4. Severity ratings were defined as 0 = none/low, 1 = mild, 2 = moderate and 3/4 = severe.

For both cohorts conditions within a particular anatomical domain were noted to be present only if the information in the records suggested the condition was ongoing/chronic and then rated according to the CIRS.

The street health dataset contained a large number of one-off consultations. Some attendees had no fixed abode with many using drop-in centres as proxy addresses.

As far as possible, data extractors took precautions to guard against double counting. There may have been some limited cross over between street and mainstream practices but, in general, patients attending one service tended to continue doing so.

### Operational Definition

Our operational definition of multimorbidity was the co-occurrence of conditions across two or more (2+) domains in individual patients.[26] After data extraction was completed, a random sample of 30 patients across the entire age spectrum for both clinics was re-assessed to measure consistency among raters.

### Data Analysis

Data analysis was conducted using SPSS 22 (IBM Corporation). All statistical analyses were tested against an alpha level of 0.05 (two-tailed).

Sample characteristics are expressed as means (standard deviation of the mean) for continuous variables and as frequencies (percentages) for categorical variables. Independent samples t-tests and Chi-Square tests were used to examine any demographic differences between the two samples.

The crude prevalence of multimorbidity was calculated as the number of patients with long-term conditions in 2+ morbidity domains as a proportion of the total sample. Given significant differences in age-sex distribution between the two samples, age-sex adjusted prevalence was calculated for the mainstream sample using direct standardisation to the street health cohort. Chi-square tests were used to examine prevalence differences between the two cohorts. Patterns of multimorbidity are expressed as frequencies.

In addition, to ~~examine~~ examining age of onset of multimorbidity, we modelled the probability of multimorbidity as a function of age. First, a logistic regression analysis was run with the presence of multimorbidity as the dependent variable, and clinic, age, and age squared (given the non-linear relationship between age and multimorbidity) as independent variables (IV). The regression coefficients ( $\beta$ ) for each IV were then used to model the probability of multimorbidity as a function of age in each sample.

Multimorbidity severity was examined using the CIRS SI score as well as distribution of patients within each CIRS severity category. General linear modelling (GLM) was used to examine differences in multimorbidity severity between the two samples, controlling for age and gender. We also counted and compared the number of patients with at least one level 3 or 4 score across CIRS domains,[20] as well as the number of domains with a level 3 or 4 score for each patient as additional indicators of disease severity.

1  
2  
3  
4 Subgroup analysis was conducted to examine the prevalence and severity of multimorbidity in  
5 Indigenous and non-Indigenous patients in the street health cohort. There was no data on  
6 Indigenous status in the mainstream cohort for comparison.  
7  
8  
9

10  
11 We also examined the relationship between demographic characteristics and the presence of  
12 multimorbidity across 2, 3, and 5 domains using a series of logistic regression analyses.  
13  
14

15  
16 Inter-rater reliability between data extractors was assessed using Cronbach's alpha.  
17  
18

### 19 **Ethics**

20 Ethics approval for the study was obtained from The University of Notre Dame Australia Human  
21 Research Ethics Committee.  
22  
23  
24  
25  
26  
27  
28  
29  
30  
31  
32  
33  
34  
35  
36  
37  
38  
39  
40  
41  
42  
43  
44  
45  
46  
47  
48  
49  
50  
51  
52  
53  
54  
55  
56  
57  
58  
59  
60

## RESULTS

## Patient Characteristics

A total of 2587 patients attended the street health service and 4583 attended mainstream practice over the study periods. The age and gender distribution of patients at both clinics are shown in Table 1. The mean age of street health patients was 37.8 years (SD = 18.7) compared with 36.2 (SD = 21.1) for the mainstream practice. There were no significant differences in age between the two cohorts,  $p=0.055$ , but a significant difference in gender distribution was observed. The majority of the street health patients were male (57.3%, 1482/2587) while the majority of patients attending mainstream practice were female (60.7%, 2783/4583),  $p<0.001$ .

Table 1. Age and Gender Distribution for Study Population

|                              | Fremantle Street Doctor       |                                 |                                      | Mainstream practice<br>( <i>n</i> = 4583) |
|------------------------------|-------------------------------|---------------------------------|--------------------------------------|-------------------------------------------|
|                              | Overall<br>( <i>n</i> = 2587) | Aboriginal<br>( <i>n</i> = 766) | Non-Aboriginal<br>( <i>n</i> = 1821) |                                           |
| Sex, % ( <i>n</i> )          |                               |                                 |                                      |                                           |
| Male                         | 57.3 (1482)                   | 50.3 (385)                      | 60.2 (1097)                          | 39.3 (1800)                               |
| Female                       | 42.7 (1105)                   | 49.7 (381)                      | 39.8 (724)                           | 60.7 (2783)                               |
| Age, mean (SD) [range]       |                               |                                 |                                      |                                           |
| Overall                      | 37.8 (18.7)<br>[0 to 103]     | 32.09 (17.9)<br>[0 to 81]       | 40.19 (18.5)<br>[0 to 103]           | 36.18 (21.1)<br>[0 to 98]                 |
| Male                         | 39.1 (18.5)<br>[0 to 103]     | 31.8 (18.1)<br>[1 to 81]        | 41.6 (17.9)<br>[0 to 103]            | 35.1 (22.3)<br>[0 to 92]                  |
| Female                       | 36.1 (18.7)<br>[0 to 90]      | 32.3 (17.7)<br>[0 to 75]        | 38.0 (18.9)<br>[0 to 90]             | 36.9 (20.3)<br>[0 to 98]                  |
| Age Category, % ( <i>n</i> ) |                               |                                 |                                      |                                           |
| < 25                         | 24.2 (626)                    | 36.8 (282)                      | 18.9 (344)                           | 28.9 (1326)                               |
| 25 to 44                     | 39.5 (1023)                   | 35.8 (274)                      | 41.1 (749)                           | 35.7 (1635)                               |
| 45 to 64                     | 28.3 (732)                    | 24.4 (187)                      | 29.9 (545)                           | 27.1 (1243)                               |
| 65 to 74                     | 5.3 (136)                     | 2.3 (18)                        | 6.5 (118)                            | 4.6 (211)                                 |
| 75+                          | 2.7 (70)                      | 0.7 (5)                         | 3.6 (65)                             | 3.7 (168)                                 |

Aboriginal patients were 29.6% (766/2587) of the street health sample. On average, Aboriginal patients were significantly younger than non-Aboriginal patients, with 36.8% (282/766) under the age of 25 compared with only 18.9% (344/1821) of non-Aboriginals,  $p<0.001$ . The majority of non-Aboriginal patients were male (60.2%, 1097/1821) while there was a more even gender distribution for Aboriginal patients attending the street health service (male 50.3%, 385/766),  $p<0.001$ .

## Inter-rater Reliability



Inter-rater reliability between data extractors was tested on CIRS scores and number of domains with morbidities for 30 randomly selected patients from each of the two cohorts. For the street health cohort, the intraclass correlation coefficient (ICC) was 0.94 (95% confidence interval 0.89 to 0.97) for number of domains with morbidities and 0.96 (95% CI 0.93 to 0.98) for total CIRS scores indicating high inter-rater reliability. For the mainstream practice sample, the ICC was 0.98 (95% CI 0.97 to 0.99) for number of domains with morbidities and 0.98 (95% CI 0.97 to 0.99) for CIRS scores.

### Prevalence of Multimorbidity

Overall, the crude prevalence of multimorbidity was lower in the street health sample.

Multimorbidity, based on the presence of conditions affecting 2+ domains, was present in 46.3% (1199/2587, 95% confidence interval CI 44.4 to 48.3%) of street health patients, compared with 50.1% (2294/4583, 95% CI 48.6 to 51.5%) of the mainstream sample,  $p=0.003$ .

~~A total of 28.0% (724/2587) of the street health cohort had multimorbidity in 3+ domains compared with 31.9% (1464/4583) of mainstream patients,  $p<0.001$ . Across 5+ domains, 10% (259/2587) of street health patients showed multimorbidity compared with 12.8% (587/4583) of the mainstream sample,  $p<0.001$ .~~

After direct age-sex adjustment of the mainstream prevalence rates, the prevalence of multimorbidity was significantly higher in the street health (46.3%, 1199/2587, 95% confidence interval CI 44.4 to 48.3%) compared with mainstream sample (43.1%, 2000/4583, 95% CI 42.2 to 45.8%),  $p=0.011$ . The prevalence of multimorbidity in 3+ domains was comparable between the street health (28.0%, 724/2587, 95% CI 26.3 to 29.7%) and mainstream samples (29.2%, 1339/4583, 95% CI 27.9 to 30.5%),  $p=0.269$ . There was also no significant difference in multimorbidity prevalence across 5+ domains between the street health (10%, 259/2587, 95% CI 8.9 to 11.2%) and mainstream (10.5%, 485/4583, 95% CI 9.7 to 11.5%) samples,  $p=0.437$ .

~~After direct age-sex adjustment of the mainstream prevalence rate, the prevalence of multimorbidity was significantly higher in the street health (46.3%, 1199/2587) compared with mainstream sample (43.1%, 2000/4583),  $p=0.011$~~

Figure 1 ~~shows~~ shows the crude prevalence of multimorbidity across 2+ domains for the street health and age-sex adjusted mainstream ~~both~~ samples across age groups. The prevalence of multimorbidity among ~~young~~ street health patients aged <45 years (37.3%, 615/1649, 95% CI 34.9 to 39.7% ~~37.7%, 615/1649~~) was significantly higher than in the adjusted mainstream sample (33.0%, 977/2961, 95% CI 31.3 to 34.7% ~~34.3%, 1017/2961~~),  $p=0.045$  0.003. Multimorbidity prevalence was

comparable in the 45 to 64 year age group for the street health (62.0%, 454/732, 95% CI 58.4 to 65.5%) and adjusted mainstream (62.5%, 778/1243, 95% CI 59.9 to 66.2%) samples,  $p=0.825$ .

Multimorbidity prevalence was significantly lower in the street health sample for patients 45-65+ years (62.30%, 584/938, 95% CI 54.8 to 68.7%) compared to the adjusted mainstream sample vs (78.7% [1277/1622], 90.7%, 322/355, 95% CI 87.2 to 93.3% respectively),  $p<0.001$ .

After direct age-sex adjustment of the mainstream prevalence rate, the prevalence of multimorbidity was significantly higher in the street health (46.3%, 1199/2587) than mainstream sample (43.1%, 2000/4583),  $p=0.011$ .

Age of onset of multimorbidity was different for the two populations (Figure 2). For street health patients, the probability of multimorbidity peaked between 61 and 67 years,  $P(E_{\text{STREET HEALTH}})=0.78$ , and then decreased. For mainstream patients, the probability of multimorbidity increased with age, with the greatest probability of multimorbidity observed for individuals aged over 70 years,  $P(E_{\text{MAINSTREAM}})=0.99$ . Between the ages of 14 and 43, the probability of multimorbidity was higher for street health patients,  $P(E_{\text{STREET HEALTH}})=\text{range } 0.26 \text{ to } 0.71$  vs.  $P(E_{\text{MAINSTREAM}})=\text{range } 0.24 \text{ to } 0.69$ , suggesting that younger street health patients are particularly vulnerable to multimorbidity. The greatest difference was observed between the ages of 23 and 34,  $P(E_{\text{STREET HEALTH}})=\text{range } 0.43 \text{ to } 0.62$  vs.  $P(E_{\text{MAINSTREAM}})=\text{range } 0.33 \text{ to } 0.52$ , with street health patients showing a mean 12% greater chance of multimorbidity than mainstream patients in this age group.

Overall for the street health Aboriginal patients, multimorbidity (2+ domains) was present in 50.4% (386/765, 95% confidence interval CI 46.9 to 53.9%) compared with 44.6% (813/1821, 95% CI 42.4 to 46.9%) in non-Aboriginals,  $p=0.007$ . A total of 33.2% of Aboriginal patients (254/766, 95% CI 29.9 to 36.6%) had 3+ domains affected compared with 25.8% (470/1821, 95% CI 23.8 to 27.9%) in non-Aboriginals,  $p<0.001$ , while 13.7% (105/765, 95% CI 11.5 to 16.3%) had 5+ domains affected compared with 8.5% (154/1821, 95% CI 7.3 to 9.8%) in non-Aboriginals,  $p<0.001$ . Stratified by age, the prevalence of multimorbidity (2+) across all age groups was significantly higher among Aboriginal compared with non-Aboriginal patients,  $p<0.001$  (Figure 3).

### Patterns of Multimorbidity

Table 2 displays the prevalence of the five most common body system domain combinations across single, 1+, 2+, 3+ and 5+ domains for the street health sample with corresponding prevalence rates

1  
2  
3 in mainstream practice for comparison. Table 2 also displays the prevalence of the five most  
4 common domain combinations stratified by age.  
5  
6

7  
8 Table 3 displays the prevalence of the five most common domain combinations across single, 1+, 2+,  
9 3+ and 5+ domains stratified by Indigenous status and age.  
10

11  
12 Consistent with the CIRS guidelines, patients with conditions that appeared to be ongoing (for  
13 example, chronic leg ulcers ~~and~~, non-healing skin infections ~~and~~ /lacerations ~~and scabies infestation~~)  
14 were included in the musculoskeletal/integumental domain.  
15  
16  
17  
18  
19  
20  
21  
22  
23  
24  
25  
26  
27  
28  
29  
30  
31  
32  
33  
34  
35  
36  
37  
38  
39  
40  
41  
42  
43  
44  
45  
46  
47  
48  
49  
50  
51  
52  
53  
54  
55  
56  
57  
58  
59  
60

Table 2. Overall and age category breakdown for the 5 most common domains for Street Health cohort

|                                       | Domains                                               | Street Health<br>% (n) | Mainstream<br>practice<br>% (n) <sup>a-d</sup> | Age category (Street health cohort only) |            |            |           |           |
|---------------------------------------|-------------------------------------------------------|------------------------|------------------------------------------------|------------------------------------------|------------|------------|-----------|-----------|
|                                       |                                                       |                        |                                                | < 25                                     | 25 to 44   | 45 to 64   | 65 to 74  | 75+       |
| One domain<br>only<br>(n = 798)       | Musculoskeletal                                       | 29.8 (238)**           | 21.8 (231)                                     | 24.2 (58)                                | 49.2 (117) | 19.7 (47)  | 5.9 (14)  | 0.8 (2)   |
|                                       | Psychiatric                                           | 20.3 (162)             | 18.7 (198)                                     | 20.4 (33)                                | 53.7 (87)  | 24.1 (39)  | 1.9 (3)   | 0         |
|                                       | Eye, ear, nose and throat                             | 13.7 (109)*            | 9.7 (103)                                      | 62.4 (68)                                | 18.3 (20)  | 14.7 (16)  | 0.9 (1)   | 3.7 (4)   |
|                                       | Respiratory                                           | 9.4 (75)               | 17.8 (188)                                     | 38.7 (29)                                | 29.3 (22)  | 30.7 (23)  | 1.3 (1)   | 0         |
|                                       | Genitourinary                                         | 6.9 (55)               | 8.5 (90)                                       | 14.5 (8)                                 | 69.1 (38)  | 14.5 (8)   | 1.8 (1)   | 0         |
| One or more<br>domains<br>(n = 1997)  | Psychiatric                                           | 46.7 (933)**           | 34.6 (1161)                                    | 8.6 (80)                                 | 48.9 (456) | 36.5 (341) | 4.7 (44)  | 1.3 (12)  |
|                                       | Musculoskeletal                                       | 42.9 (856)             | 45.2 (1514)                                    | 13.1 (112)                               | 44.6 (382) | 31.8 (272) | 7.1 (61)  | 3.4 (29)  |
|                                       | Respiratory                                           | 35.0 (699)             | 35.6 (1193)                                    | 11.7 (82)                                | 43.2 (302) | 38.6 (270) | 4.9 (34)  | 1.6 (11)  |
|                                       | Eye, ear, nose and throat                             | 19.1 (381)*            | 22.7 (762)                                     | 29.4 (112)                               | 29.7 (113) | 29.7 (113) | 6.3 (24)  | 5.0 (19)  |
|                                       | Vascular                                              | 18.2 (364)**           | 22.3 (746)                                     | 3.3 (12)                                 | 17.6 (64)  | 53.8 (196) | 13.5 (49) | 11.8 (43) |
| Two or more<br>domains<br>(n = 1199)  | Psychiatric + Respiratory                             | 37.1 (445)**           | 18.8 (432)                                     | 7.2 (32)                                 | 48.3 (215) | 39.1 (174) | 4.3 (19)  | 1.1 (5)   |
|                                       | Psychiatric + Musculoskeletal                         | 32.4 (388)**           | 22.2 (510)                                     | 3.6 (14)                                 | 47.2 (183) | 41.8 (162) | 5.7 (22)  | 1.8 (7)   |
|                                       | Respiratory + Musculoskeletal                         | 25.6 (307)*            | 22.4 (515)                                     | 5.9 (18)                                 | 42.3 (130) | 43.3 (133) | 6.8 (21)  | 1.6 (5)   |
|                                       | Vascular + Musculoskeletal                            | 14.6 (175)**           | 19.4 (445)                                     | 2.3 (4)                                  | 17.7 (31)  | 50.9 (89)  | 15.4 (27) | 13.7 (24) |
|                                       | Hepatic-Pancreatic + Psychiatric                      | 14.3 (172)**           | 2.8 (64)                                       | 1.7 (3)                                  | 45.9 (79)  | 45.9 (79)  | 5.3 (9)   | 1.2 (2)   |
| Three or more<br>domains<br>(n = 724) | Psychiatric + Respiratory + Musculoskeletal           | 30.9 (224)**           | 14.7 (215)                                     | 3.6 (8)                                  | 42.4 (95)  | 47.3 (106) | 5.8 (13)  | 0.9 (2)   |
|                                       | Psychiatric + Haematological + Endocrine              | 14.5 (105)             | 14.1 (206)                                     | 3.8 (4)                                  | 37.1 (39)  | 46.7 (49)  | 8.6 (9)   | 3.8 (4)   |
|                                       | Psychiatric + Respiratory + Vascular                  | 14.4 (104)**           | 8.5 (125)                                      | 2.9 (3)                                  | 25.0 (26)  | 60.6 (63)  | 8.7 (9)   | 2.9 (3)   |
|                                       | Psychiatric + Musculoskeletal + Vascular              | 14.2 (103)             | 13.1 (192)                                     | 1.0 (1)                                  | 18.4 (19)  | 60.2 (62)  | 14.6 (15) | 5.8 (6)   |
|                                       | Psychiatric + Respiratory + Lower<br>Gastrointestinal | 13.8 (100)**           | 5.9 (87)                                       | 1.0 (1)                                  | 46.0 (46)  | 50.0 (50)  | 1.0 (1)   | 2.0 (2)   |

<sup>a</sup> For 1 domain only, denominator (n = 1058), <sup>b</sup> For 1+ domains, denominator (n = 3352), <sup>c</sup> For 2+ domains, denominator (n = 2294), <sup>d</sup> For 3+ domains, denominator (n = 1772)

\* Chi square test significant at .05 level vs mainstream practice

\*\* Chi square test significant at .001 level vs mainstream practice

Table 3. Overall and age category breakdown for the 5 most common domains for Aboriginal Street Health patients

|                                    | Domains                                     | Aboriginal<br>% (n) | Non-Aboriginal<br>% (n) <sup>a-d</sup> | Age category (Aboriginal patients only) |            |            |          |         |
|------------------------------------|---------------------------------------------|---------------------|----------------------------------------|-----------------------------------------|------------|------------|----------|---------|
|                                    |                                             |                     |                                        | < 25                                    | 25 to 44   | 45 to 64   | 65 to 74 | 75+     |
| One domain only<br>(n = 216)       | Musculoskeletal                             | 34.3 (74)           | 28.2 (164)                             | 55.4 (41)                               | 36.5 (27)  | 8.1 (6)    | 0        | 0       |
|                                    | Eye, ear, nose and throat                   | 19.0 (41)*          | 11.7 (68)                              | 85.4 (35)                               | 12.2 (5)   | 2.4 (1)    | 0        | 0       |
|                                    | Psychiatric                                 | 13.0 (28)*          | 23.0 (134)                             | 25.0 (7)                                | 57.1 (16)  | 17.9 (5)   | 0        | 0       |
|                                    | Respiratory                                 | 8.3 (18)            | 9.8 (57)                               | 55.6 (10)                               | 22.2 (4)   | 22.2 (4)   | 0        | 0       |
|                                    | Lower gastrointestinal                      | 6.0 (13)            | 5.0 (29)                               | 30.8 (4)                                | 53.8 (7)   | 15.4 (2)   | 0        | 0       |
| One or more domains<br>(n = 602)   | Musculoskeletal                             | 47.5 (286)*         | 40.9 (570)                             | 25.9 (74)                               | 40.2 (115) | 30.1 (86)  | 3.1 (9)  | 0.7 (2) |
|                                    | Psychiatric                                 | 45.5 (274)          | 47.2 (659)                             | 10.6 (29)                               | 47.8 (131) | 37.2 (102) | 4.0 (11) | 0.4 (1) |
|                                    | Respiratory                                 | 38.7 (233)*         | 33.4 (466)                             | 16.3 (38)                               | 42.5 (99)  | 36.9 (86)  | 3.4 (8)  | 0.9 (2) |
|                                    | Eye, ear, nose and throat                   | 24.9 (150)**        | 16.6 (231)                             | 42.0 (63)                               | 27.3 (41)  | 24.7 (37)  | 4.0 (6)  | 2.0 (3) |
|                                    | Endocrine                                   | 24.4 (147)**        | 13.3 (186)                             | 7.5 (11)                                | 34.0 (50)  | 46.9 (69)  | 8.8 (13) | 2.7 (4) |
| Two or more domains<br>(n = 386)   | Psychiatric + Respiratory                   | 39.6 (153)          | 35.9 (292)                             | 9.8 (15)                                | 47.7 (73)  | 38.6 (59)  | 3.3 (5)  | 0.7 (1) |
|                                    | Psychiatric + Musculoskeletal               | 35.2 (136)          | 31.0 (252)                             | 5.1 (7)                                 | 46.3 (63)  | 44.1 (60)  | 4.4 (6)  | 0       |
|                                    | Respiratory + Musculoskeletal               | 31.3 (121)*         | 22.9 (186)                             | 9.1 (11)                                | 42.1 (51)  | 43.8 (53)  | 4.1 (5)  | 0.8 (1) |
|                                    | Respiratory + Endocrine                     | 20.2 (78)**         | 7.7 (63)                               | 5.1 (4)                                 | 35.9 (28)  | 50.0 (39)  | 7.7 (6)  | 1.3 (1) |
|                                    | Psychiatric + Endocrine                     | 19.2 (74)**         | 10.2 (83)                              | 5.4 (4)                                 | 36.5 (27)  | 47.3 (35)  | 9.5 (7)  | 1.4 (1) |
| Three or more domains<br>(n = 254) | Psychiatric + Respiratory + Musculoskeletal | 35.8 (91)*          | 28.3 (133)                             | 5.5 (5)                                 | 44.0 (40)  | 47.3 (43)  | 3.3 (3)  | 0       |
|                                    | Psychiatric + Haematological + Endocrine    | 22.4 (57)**         | 10.2 (48)                              | 3.5 (2)                                 | 40.4 (23)  | 47.4 (27)  | 7.0 (4)  | 1.8 (1) |
|                                    | Respiratory + Musculoskeletal + Endocrine   | 18.9 (48)**         | 7.4 (35)                               | 2.1 (1)                                 | 31.3 (15)  | 60.4 (29)  | 6.3 (3)  | 0       |
|                                    | Vascular + Respiratory + Endocrine          | 18.5 (47)**         | 6.8 (32)                               | 0                                       | 27.7 (13)  | 63.8 (30)  | 6.4 (3)  | 2.1 (1) |
|                                    | Psychiatric + Vascular + Respiratory        | 18.1 (46)*          | 12.3 (58)                              | 2.2 (1)                                 | 28.3 (13)  | 65.2 (30)  | 2.2 (1)  | 2.2 (1) |

<sup>a</sup> For 1 domain only, denominator (n = 582), <sup>b</sup> For 1+ domains, denominator (n = 1395), <sup>c</sup> For 2+ domains, denominator (n = 813), <sup>d</sup> For 3+ domains, denominator (n = 470)

\* Chi square test significant at .05 level vs Non-Aboriginal

\*\* Chi square test significant at .001 level vs Non-Aboriginal

### Multimorbidity Severity Index

Overall, GLM analysis revealed a significantly greater severity of disease among the street health cohort. Controlling for age and gender, street health patients (M = 1.4, SD = .91) had significantly higher multimorbidity severity than mainstream patients (M = 1.1, SD = .80),  $p < 0.001$ .

A significantly greater proportion of the street health patients were represented in the moderate (34.1%, 883/2587, 95% confidence interval CI 32.3 to 35.9%),  $p < 0.001$ , and severe categories (4.9%, 126/2587, 95% CI 4.1 to 5.8%),  $p < 0.001$ , compared with mainstream patients (moderate: 21.0%, 961/4583, 95% CI 19.8 to 22.2%; severe: 1.2%, 53/4583, 95% CI, 0.9 to 1.5%). When multimorbidity severity was stratified by age (Figure 4), a greater proportion of street health patients were again represented in the moderate and severe categories across every age category.

Overall, 24.4% (632/2587) of street health patients compared to 10.1% (463/4583) of mainstream patients had at least one level 3 or level 4 score across domains,  $p < 0.001$ . For patients with multimorbidity, this was 44.2% (530/1199) for street health cohort vs 18.3% (420/2294) of mainstream patients,  $p < 0.001$ .

Figure 5 shows the frequency trends of number of domains with level 3 or 4 scores[20] for patients with multimorbidity across 2+ domains for both cohorts, revealing a more pronounced and earlier onset of increased disease burden in the 25-44 and 45-64 year age group for street health patients but especially Aboriginal patients.

For the street health cohort, Aboriginal patients scored marginally higher on the CIRS Severity Index (M = 1.39, SD = 0.89) compared with non-Aboriginal patients (M = 1.34, SD = 0.91), although this difference was not statistically significant,  $p = 0.610$ .

### Factors Associated with Multimorbidity

Logistic regression analyses using the occurrence of multimorbidity across 2+, 3+ and 5+ domains as the criterion variable showed multimorbidity to be significantly associated with male gender, increasing age and Indigenous status (Table 4). Indigenous status was the strongest predictor of multimorbidity in each model. Aboriginal patients had an 87% increase in the likelihood of displaying multimorbidity across 2+ domains compared with non-Aboriginals. Aboriginal patients were also twice as likely to show multimorbidity across 3+ domains and nearly three times more likely to show multimorbidity across 5+ domains.

**Table 4. Relation between socio-demographic characteristics and the prevalence of multimorbidity**

| Characteristic    | Odds ratio | 95% CI       |
|-------------------|------------|--------------|
| <b>2+ Domains</b> |            |              |
| Male*             | 1.44       | 1.22 to 1.70 |
| Age *             | 1.01       | 1.04 to 1.05 |
| Indigenous*       | 1.87       | 1.55 to 2.26 |
| <b>3+ Domains</b> |            |              |
| Male*             | 1.41       | 1.17 to 1.70 |
| Age*              | 1.04       | 1.04 to 1.05 |
| Indigenous*       | 2.17       | 2.17 to 2.66 |
| <b>5+ Domains</b> |            |              |
| Male*             | 1.26       | 0.96 to 1.67 |
| Age*              | 1.05       | 1.04 to 1.06 |
| Indigenous*       | 2.82       | 2.11 to 3.77 |

\*  $p < .001$ 

## DISCUSSION

Research on multimorbidity among street health populations is scarce with little data available on patterns, prevalence or disease severity among particular age or ethnic groups. Existing research has tended to focus on specific areas, such as homelessness and mental health,[27-29] with little attention on the cumulative and synergistic effects of multiple chronic conditions or a broader biopsychosocial approach to health care needs.[4,30] The prevalence of multimorbidity is higher in deprived as opposed to more affluent areas[3,31] with multiple physical diseases often co-existing among patients with mental illness.[4,31,32]

This is the first study to use 42 conditions affecting anatomical domains to estimate patterns and prevalence of multimorbidity among marginalised and homeless patients attending a designated, primary care-run, street-based outreach service. Like our earlier mainstream practices study,[24] we include an estimation of disease severity to enhance the overall picture of multimorbidity burden in this population.

Key findings from our study include that multimorbidity is significantly associated with male gender, increasing age and Indigenous status with the latter the strongest predictor of multimorbidity irrespective of whether 2+, 3+ or 5+ domains are used as the criterion variable.

### Strengths and limitations of the study

1  
2  
3 The strengths of this study include the large street health cohort size involving the total population  
4 seen over a six year period and the fact that we include a disease severity rating for each patient in  
5 addition to prevalence and patterns data recorded.  
6  
7

8  
9 A major difficulty we encountered was enumerating the homeless population mainly because it  
10 lacked a common definition.[33] The open access policy to the street health service could have had a  
11 diluting effect on the proportion of more traditional users of the service because of one-off  
12 opportunistic and convenience attendances. Among street health patients, 22.8% had no  
13 multimorbidity compared with 26.9% among mainstream patients.  
14  
15

16  
17 Our method of estimation of multimorbidity relies on the accrual of formal diagnoses of conditions  
18 which in turn partly relies on regular attendance with care providers. Hence, the transient nature of  
19 the street health cohort may have impact on the estimation of multimorbidity compared to the  
20 more stable mainstream cohort.  
21  
22  
23  
24

25  
26  
27 -In addition, whilst the street health population is based on data collected over a six year period, the  
28 comparator mainstream practice data was collected over six months.[24]  
29

30  
31 Chronic skin ulcers and slow to heal lacerations/infections were prominent in street cohort  
32 compared to mainstream reflecting the reality of their poor living circumstances and hygiene.  
33 Inclusion of these conditions as part of the musculoskeletal/integumental domain was based on  
34 their recurrent, chronic presentations in this population and is likely to have increased the overall  
35 prevalence of this domain. It was not possible to estimate proportion of  
36 musculoskeletal/integumental domain that related to chronic skin problems.  
37  
38  
39  
40  
41  
42  
43

#### 44 **Prevalence and patterns**

45  
46 Multimorbidity prevalence among the street health cohort was significantly higher than the age-sex  
47 adjusted prevalence for the mainstream cohort. The age breakdown across 2+ domains shows  
48 younger patients as much more vulnerable to having multiple chronic conditions with a 12% greater  
49 likelihood among 23 - 34 year old patients. This contrasts with findings from our earlier research  
50 where prevalence patterns progressively increased from the 25 – 44 year age group to the 45 – 64  
51 and 65 -74 year age groups-[24] and results in the flatter trajectory of the S-shaped distribution  
52 curve as seen in Figure 1. The reason for multimorbidity peaking in the 25 - 44 year age group in the  
53 street health population could be explained by the premature deaths of these patients or the  
54  
55  
56  
57  
58  
59  
60



possibility that those surviving to older age start attending mainstream practices or become institutional residents.

A key finding from our study is the willingness of Aboriginal patients to attend the street health service - 29.6% v. 1.6% to Australian primary care practices[34] – and that Aboriginal patients overall are significantly younger – 36.8% v. 18.9% under 25 years old - than non-Aboriginal patients. Due to a lack of data on Aboriginality/Indigenous status amongst the mainstream practice, it was not possible to compare both cohorts. Among the street health population, Aboriginal patients have significantly higher rates of multimorbidity across all age groups and number of domains affected.

The high prevalence of psychiatric morbidity (46.7%) was not unexpected. The three most common domains - psychiatric, musculoskeletal (42.9%) and respiratory (35.0%) - are similar to mainstream except that psychiatry and musculoskeletal are juxtaposed.[24] These three domains remain most common even when 2+ or 3+ domains are examined and may act to facilitate or accelerate other morbidities resulting in premature ageing or progressive deterioration.

~~A notable feature of the street population was the high prevalence of chronic skin conditions (leg ulcers, slow to heal infections/lacerations and scabies) reflecting the reality of poor living circumstances and hygiene. Inclusion of these conditions as part of the musculoskeletal/integumental domain is likely to have increased the overall prevalence for this domain.~~ The possibility that early onset of psychiatric illness may in turn contribute to a cascade of homelessness, lack of stable relationships and failure to achieve educational potential should be considered.

### **Disease severity**

Disease severity burden is of particular value in disadvantaged populations because the cumulative and synergistic nature of their multimorbidities impacts on their need for appropriate health services[30] while their socioeconomic circumstances renders their access to such services inequitable. American,[10] Canadian[9] and British[12,13] studies have all found much common ground with housing, mental illness, poor education and smoking common factors throughout. Complex interventions invariably do better when housing is integrated into the solution and the importance of social geography and family supports acknowledged.[7] There is no definitive answer but well integrated support networks built around primary care services would appear a logical way forward.

1  
2  
3 We found the multimorbidity SI significantly higher for street health patients, more pronounced with  
4 'moderate' and 'severe' morbidity and persisting across all age categories. Given the large numbers  
5 in the two population cohorts, the relatively small but significant differences of 13% in the  
6 moderately severe and 4% in the severe disease severity index categories translate to a substantial  
7 number of patients. The impost in terms of service delivery could therefore be greater than is  
8 primarily evident. Taken together with the fact that the presence of multiple severe or moderately  
9 severe chronic conditions is not compatible with long-term survival or management in the primary  
10 care setting especially amongst a marginalised, street health population, it is likely to impact directly  
11 on Emergency Department visits and hospital admissions.  
12

13  
14 After age-sex adjustment, multimorbidity prevalence is significantly higher among the street health  
15 cohort. Where disease exists, it tends to be of significantly greater severity as reflected by the more  
16 pronounced domain level 3 and level 4 scores. This supports earlier research by Starfield and  
17 Kinder[35] that morbidities are not randomly distributed amongst populations. Instead, those with  
18 the highest vulnerability to illness have a greater disadvantage because the clustering of morbidities  
19 in these sub-populations diminishes their quality of life.[3] Multimorbidity in such circumstances  
20 impacts negatively not just on their functioning status[36,37] but also causes increased and poorly  
21 co-ordinated use of health services,[5] increased direct and indirect healthcare costs[6] and  
22 heightens the risk of premature death.[38,39]  
23  
24  
25  
26  
27  
28  
29  
30  
31  
32  
33  
34  
35

### 36 **Conclusion**

37  
38 Our study reports on the prevalence, patterns and disease severity of multimorbidity among a  
39 marginalised population attending a primary care-led, street health clinic in Western Australia.  
40 Overall, the probability of early onset (23-34 years) multimorbidity is higher in the street health  
41 cohort compared with mainstream practice but not in patients aged over 45 years with psychiatric,  
42 musculoskeletal and respiratory the commonest domains affected. For Aboriginal patients, the  
43 prevalence of multimorbidity is higher across all ages but especially if aged < 25 years.  
44  
45  
46  
47  
48

49 Disease severity is significantly higher in the street health population, especially Aboriginal patients,  
50 with greater 'moderate' and 'severe' morbidity and persists across all age categories. Attendance  
51 patterns for Aboriginal patients suggest they are more likely to engage with street-based, outreach  
52 service than mainstream practice. Reasons for this increased engagement warrant further  
53 investigation.  
54  
55  
56  
57  
58  
59  
60

1  
2  
3 Our findings have implications on the design and delivery of health care services to meet the  
4 increasing challenge of multimorbidity[4,40] in disadvantaged and Indigenous populations.  
5 Traditional approaches to service delivery fail to meet the needs of this population.[12] Such  
6 services need more complex interventions but are unlikely to receive appropriate health services  
7 expenditure and compare unfavourably with that offered to mainstream patients. A more integrated  
8 outreach approach involving better housing, psychiatric, education and social supports would seem  
9 logical to address their needs. Longer term prospective studies including an economic analysis  
10 component would be helpful.  
11  
12  
13  
14  
15

## 16 **WHAT THIS PAPER ADDS:**

### 17 **What is already known on this subject**

18  
19  
20  
21 Marginalised and homeless people have more chronic diseases, high mortality rates, high direct and  
22 indirect health care costs and generally make poor utilisation of available health services. Mental  
23 illness, drug and alcohol abuse are especially common in homeless people. The Inverse Care Law[11]  
24 ensures that those in greatest need generally receive the least treatment.  
25  
26  
27  
28

### 29 **What this study adds**

30  
31 Our study shows multimorbidity amongst street health patients is common, more severe and exists  
32 across all anatomical domains with younger patients (23-34 year olds) and Aboriginal patients  
33 especially vulnerable. Among the street health population, multimorbidity is significantly associated  
34 with male gender, increasing age and Indigenous status. Aboriginal patients comprise 29.6% of the  
35 street health cohort which compares favourably with the 1.6% attending mainstream Australian  
36 practices and offers hope for greater engagement of basic health services into the future.  
37  
38  
39  
40  
41

## 42 **ACKNOWLEDGEMENTS**

43  
44 We acknowledge the assistance of the staff at the Freo Street Doctor clinic, Fremantle Medicare  
45 Local and the medical practice involved in the study. We acknowledge the assistance of Drs Maeve  
46 Kiely and Cam Phan with data acquisition. Research support was received from The Australian  
47 Commonwealth Government Primary Health Care Research Evaluation and Development (PHCRED)  
48 Strategy Phase 2. The General Practice and Primary Health Care Research Unit is partly funded under  
49 the Collaborative Research Network (CRN) Program Grant from the Australian Government  
50 Department of Education to the University of Notre Dame Australia. We also acknowledge financial  
51 support from J Galvin, W Cunningham, L Ryan and A Neale.  
52  
53  
54  
55  
56  
57  
58  
59  
60

**CONFLICT DISCLOSURE**

All authors have completed the ICMJE uniform disclosure form at [www.icmje.org/coi\\_disclosure.pdf](http://www.icmje.org/coi_disclosure.pdf) and declare: TB, DAR, LT and RGM have received research grant funding; DAR has received support from research donations; no other relationships or activities that could appear to have influenced the submitted work.

**DATA SHARING STATEMENT**

No additional data are available

**CONTRIBUTORS**

TB and DAR made substantial contributions to the conception and design of the work as well as the acquisition, analysis and interpretation of data for the study.

LT and MB made substantial contributions to the analysis and interpretation of data.

RGM made substantial contributions to the acquisition of data.

TB, DAR and LT were responsible for drafting the manuscript and all authors revised it critically for important intellectual content, final approval of the version to be published and agree to be accountable for all aspects of the work in ensuring that questions related to the accuracy or integrity of any part of the work are appropriately investigated and resolved.

**REFERENCES**

1. Barnett K, Mercer SW, Norbury M, et al. Epidemiology of multimorbidity and implications for health care, research, and medical education: a cross-sectional study. *Lancet* 2012;**380**:37-43 doi: 10.016/S0140-6736(12)60240-2.
2. Fortin M, Lapointe L, Hudon C, et al. Multimorbidity and quality of life in primary care: a systematic review. *Health and Quality of Life Outcomes* 2004;**2**:51.
3. Mercer S, Watt G. The Inverse Care Law: Clinical primary care encounters in deprived and affluent areas of Scotland. *Ann Fam Med* 2007;**5**:503-10.
4. Payne R, Gray A, Guthrie B, et al. The effect of physical multimorbidity, mental health conditions and socioeconomic deprivation on unplanned admissions to hospital: a retrospective cohort study. *CMAJ* 2013;**185**(5):E221-8 doi: 10.1503/cmaj.121349.
5. Salisbury C, Johnson L, Purdy S, et al. Epidemiology and impact of Multimorbidity in primary care: a retrospective cohort study. *Br J Gen Pract* 2011;**61**:18-24.
6. Hoffman C, Rice D, Hai-Yen S. Persons with chronic conditions - their prevalence and costs. *JAMA* 1996;**276**:1473-79.
7. Sadowski L, Kee R, VanderWeele T, et al. Effect of a housing and case management program on emergency department visits and hospitalizations among chronically ill homeless adults. *JAMA* 2009;**301**:1771-8.
8. Glynn L, Valderas JM, Healy P, et al. The prevalence of Multimorbidity in primary care and its effect on health care utilisation and cost. *Fam Pract* 2011(28):516-23 doi: 10.1093/fampra/cmr013.
9. Hwang S, Wilkins R, Tjepkema M, et al. Mortality among residents of shelters, rooming houses, and hotels in Canada: 11 year follow-up study. *BMJ* 2009;**339**:b4036 doi: 10.1136/bmj.b4036.
10. Lantz P, House J, Lepkowski J, et al. Socioeconomic factors, health behaviors, and mortality: results from a nationally representative prospective study of US adults. *JAMA* 1998;**279**:1703-08.
11. Tudor-Hart J. The inverse care law. *Lancet* 1971;**1**:405-12.
12. Fazel S, Khosla V, Doll H, et al. The prevalence of mental disorders among the homeless in western countries: systematic review and meta-regression analysis. *PLoS Medicine* 2008;**5**(12):e225 doi: 10.1371/journal.pmed.0050225
13. Shaw M, Dorling D, Brimblecombe N. Life chances in Britain by housing wealth and for the homeless and vulnerably housed. *Environment and Planning A* 1999;**31**:2239-48.
14. Riley A, Harding G, Underwood M, et al. Homelessness: a problem for primary care? . *Br J Gen Pract* 2003;**55**:474-79.

- 1  
2  
3 15. Gunn JM, Ayton DR, Densley K, et al. The association between chronic illness, multimorbidity and  
4 depressive symptoms in an Australian primary care cohort. *Social Psychiatry and Psychiatric*  
5 *Epidemiology* 2012;**47**:175-84.
- 6  
7 16. Bloch G, Rozmovits L, Giambrone B. Barriers to primary care responsiveness to poverty as a risk  
8 factor for health. *BMC Family Practice* 2011;**12**:62 doi: 10.1186/1471-2296-12-62.
- 9  
10 17. Gelberg L, Gallagher T, Andersen R, et al. Competing priorities as a barrier to medical care among  
11 homeless adults in Los Angeles. *Am J Public Health* 1997;**87**:217-20.
- 12  
13 18. Jeal N, Salisbury C. Self reported experiences of health services among female street-based  
14 prostitutes: a cross sectional survey. *Br J Gen Pract* 2004;**54**:215-19.
- 15  
16 19. Cummings M, Kang M. Youth health services - improving access to primary care. *Australian*  
17 *Family Physician* 2012;**41**:339-41.
- 18  
19 20. Miller MD, Paradis CF, Houck PR, et al. Rating Chronic Medical Illness Burden in Geropsychiatric  
20 Practice and Research: Application of the Cumulative Illness Rating Scale *Psychiatric Res*  
21 *1992*;**41**:237-48 doi: [http://dx.doi.org/10.1016/0165-1781\(92\)90005-N](http://dx.doi.org/10.1016/0165-1781(92)90005-N).
- 22  
23 21. Murray S, Skull S. Hurdles to health: immigrant and refugee health care in Australia. . *Aus Health*  
24 *Rev* 2005;**29**:25-29.
- 25  
26 22. Parslow R, Jorm A, Christensen H, et al. Factors associated with young adults obtaining general  
27 practitioner services. . *Aus Health Rev* 2002;;**25**:109-17.
- 28  
29 23. Shadmi E. Multimorbidity and equity in health. *International J for Equity in Health* 2013;**12**:59  
30 doi: doi:10.1186/1475-9276-12-59.
- 31  
32 24. Brett T, Arnold-Reed D, Popescu A, et al. Multimorbidity in patients attending 2 Australian  
33 primary care practices. *Ann Fam Med* 2013;**11**:535-42 doi: 10.1370/afm.1570.
- 34  
35 25. Hudon C, Fortin M, Soubhi H. Abbreviated guidelines for scoring Cumulative Illness Rating Scale  
36 (CIRS) in family practice. *J Clin Epidemiol* 2007;**60**:212.
- 37  
38 26. O'Halloran J, Miller G, Britt H. Defining chronic conditions for primary care with ICPC-2. *Fam*  
39 *Pract* 2004;**21**:381-86.
- 40  
41 27. Hermann H, Evert H, Harvey C, et al. Disability and service use among homeless people living  
42 with psychotic disorders. *Aust NZ J Psychiatry* 2004;**38**:965-74.
- 43  
44 28. Teesson M, Hodder T, Buhrich N. Psychiatric disorders in homeless men and women in inner  
45 Sydney. *Aust NZ J Psychiatry* 2004;**38**:162-68.
- 46  
47 29. Trevena L, Nutbeam D, Simpson J. Asking the right questions of disadvantaged and homeless  
48 communities: the role of housing, patterns of illness and reporting behaviours in the  
49 measurement of health status. *Aust NZ J Public Health* 2001;**25**:298-304.
- 50  
51  
52  
53  
54  
55  
56  
57  
58  
59  
60

- 1  
2  
3 30. Bayliss E, Ellis J, Steiner J. Seniors' self-reported multimorbidity captured biopsychosocial factors  
4 not incorporated into two other data-based morbidity measures. *J Clin Epidemiol*  
5 2009;**62**:550-57.  
6  
7  
8 31. Orueta J, Nuno-Solinis R, Garcia-Alvarez A, et al. Prevalance of multimorbidity according to the  
9 deprivation level among the elderly in the Basque Country. *BMC Public Health* 2013;**13**:918.  
10  
11 32. Andrade L, Bensenor I, Viana M, et al. Clustering of psychiatric and somatic illnesses in the  
12 general population: multimorbidity and socioeconomic correlates. *Braz J Med* 2010;**43**:483-  
13 91.  
14  
15  
16 33. Fitzpatrick-Lewis D, Ganann R, Krisnaratne S, et al. Effectiveness of interventions to improve the  
17 health and housing status of homeless people: a rapid systematic review. *BMC Public Health*  
18 2011;**11**:638.  
19  
20  
21 34. Britt H, Miller G, Charles J, et al. A decade of Australian general practice activity 2002-03 to 2011-  
22 12. General practice series. Sydney: Sydney University Press, 2012.  
23  
24 35. Starfield B, Kinder K. Multimorbidity and its measurement. *Health Policy* 2011;**103**:3-8.  
25  
26 36. Bayliss E, Bayliss M, Ware J, et al. Predicting declines in physical function in persons with multiple  
27 chronic conditions: what we can learn from the medical problem list. *Health and Quality of*  
28 *Life Outcomes* 2004;**2**:47-51.  
29  
30  
31 37. Lawson K, Mercer S, Wyke S, et al. Double trouble: the impact of Multimorbidity and deprivation  
32 on preference-weighted health related quality of life - a cross-sectional analysis of the  
33 Scottish Health Survey. *International J for Equity in Health* 2013;**12**:12: 67 doi:  
34 10.1186/1475-9276-12-67.  
35  
36  
37 38. Gijzen R, Hoeymans N, Schellevis F, et al. Causes and consequences of comorbidity: A review. *J*  
38 *Clin Epidemiol* 2001;**54**:661-74.  
39  
40  
41 39. Yancik R, Wesley M, Ries L, et al. Comorbidity and age as predictors of risk for early mortality of  
42 male and female colon carcinoma patients: a population based study. *Cancer* 1998;**82**:2123-  
43 34.  
44  
45 40. Tinetti M, Fried T, Boyd C. Designing health care for the most common chronic condition -  
46 multimorbidity. *JAMA* 2012:2493-94.  
47  
48  
49  
50  
51  
52  
53  
54  
55  
56  
57  
58  
59  
60

**FIGURE LEGENDS**

**Figure 1.** Prevalence of multimorbidity within age groups with 95% confidence intervals

**Figure 2.** Probability of multimorbidity (2+ domains) as a function of age

**Figure 3.** Prevalence of multimorbidity in Street Health sample stratified by age and Indigenous status with 95% confidence intervals

**Figure 4.** Severity Index distribution within age groups

**Figure 5.** Frequency trends of number of domains with level 3 or 4 scores



1  
2  
3  
4  
5  
6  
7  
8  
9  
10  
11  
12  
13  
14  
15  
16  
17  
18  
19  
20  
21  
22  
23  
24  
25  
26  
27  
28  
29  
30  
31  
32  
33  
34  
35  
36  
37  
38  
39  
40  
41  
42  
43  
44  
45  
46  
47  
48  
49  
50  
51  
52  
53  
54  
55  
56  
57  
58  
59  
60

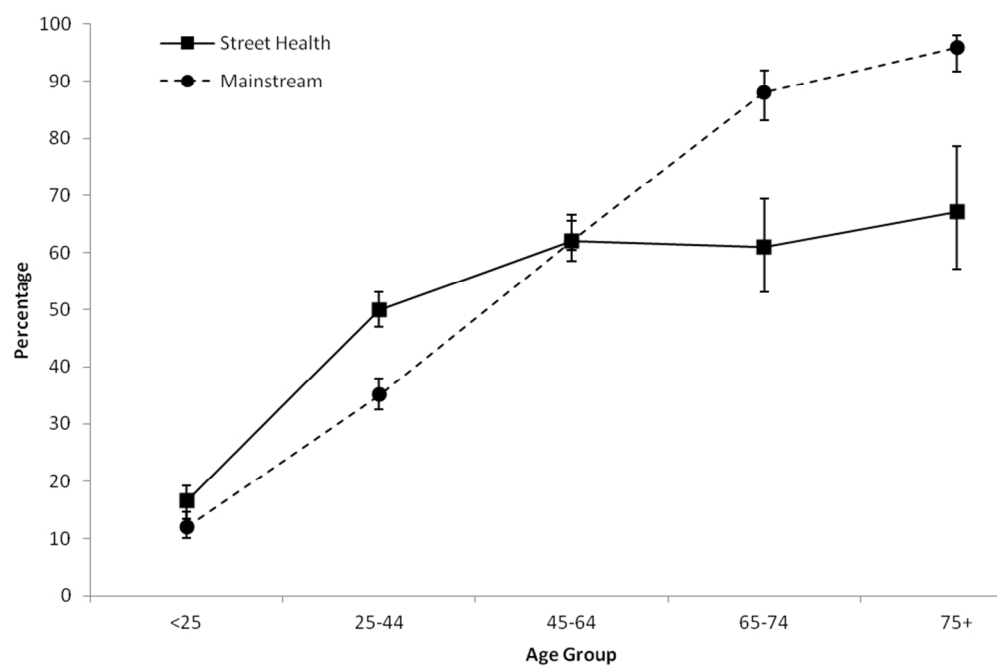

84x58mm (300 x 300 DPI)

view only

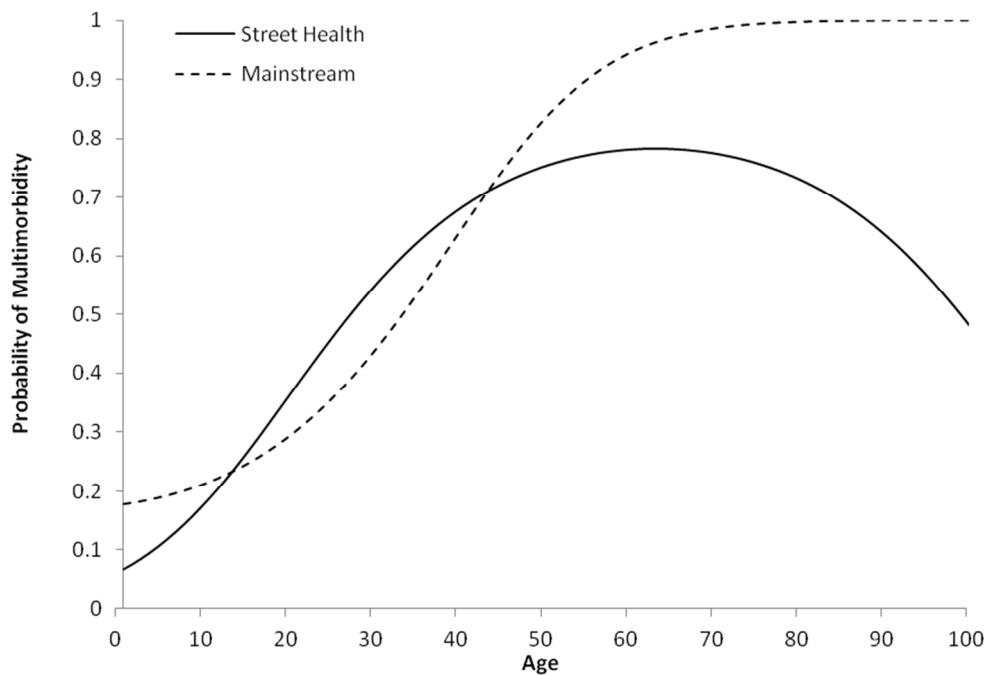

75x51mm (300 x 300 DPI)

Review only

1  
2  
3  
4  
5  
6  
7  
8  
9  
10  
11  
12  
13  
14  
15  
16  
17  
18  
19  
20  
21  
22  
23  
24  
25  
26  
27  
28  
29  
30  
31  
32  
33  
34  
35  
36  
37  
38  
39  
40  
41  
42  
43  
44  
45  
46  
47  
48  
49  
50  
51  
52  
53  
54  
55  
56  
57  
58  
59  
60

1  
2  
3  
4  
5  
6  
7  
8  
9  
10  
11  
12  
13  
14  
15  
16  
17  
18  
19  
20  
21  
22  
23  
24  
25  
26  
27  
28  
29  
30  
31  
32  
33  
34  
35  
36  
37  
38  
39  
40  
41  
42  
43  
44  
45  
46  
47  
48  
49  
50  
51  
52  
53  
54  
55  
56  
57  
58  
59  
60



80x54mm (300 x 300 DPI)

view only

1  
2  
3  
4  
5  
6  
7  
8  
9  
10  
11  
12  
13  
14  
15  
16  
17  
18  
19  
20  
21  
22  
23  
24  
25  
26  
27  
28  
29  
30  
31  
32  
33  
34  
35  
36  
37  
38  
39  
40  
41  
42  
43  
44  
45  
46  
47  
48  
49  
50  
51  
52  
53  
54  
55  
56  
57  
58  
59  
60

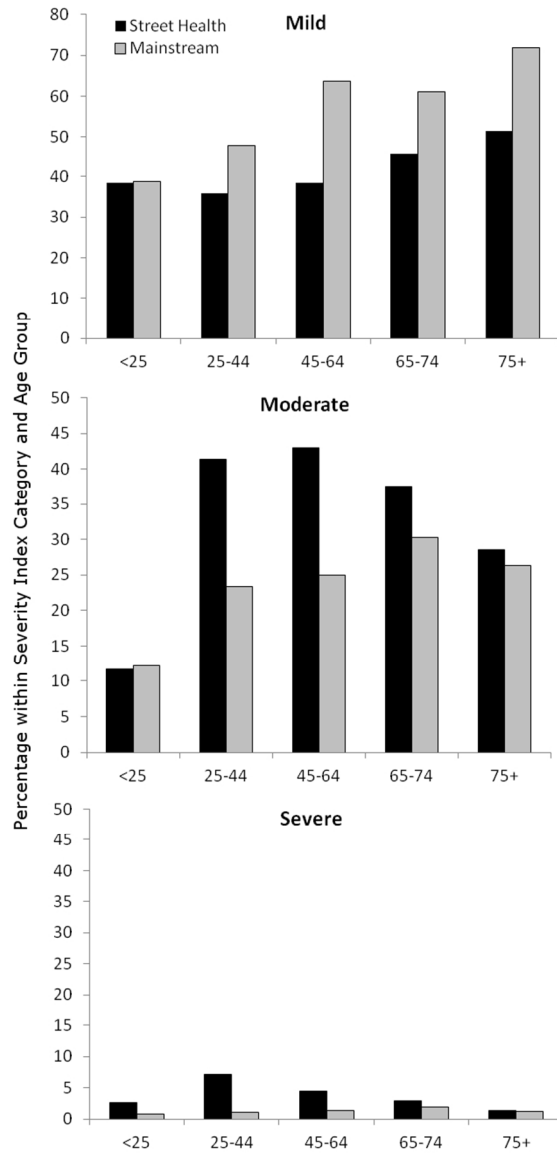

60x116mm (300 x 300 DPI)

1  
2  
3  
4  
5  
6  
7  
8  
9  
10  
11  
12  
13  
14  
15  
16  
17  
18  
19  
20  
21  
22  
23  
24  
25  
26  
27  
28  
29  
30  
31  
32  
33  
34  
35  
36  
37  
38  
39  
40  
41  
42  
43  
44  
45  
46  
47  
48  
49  
50  
51  
52  
53  
54  
55  
56  
57  
58  
59  
60

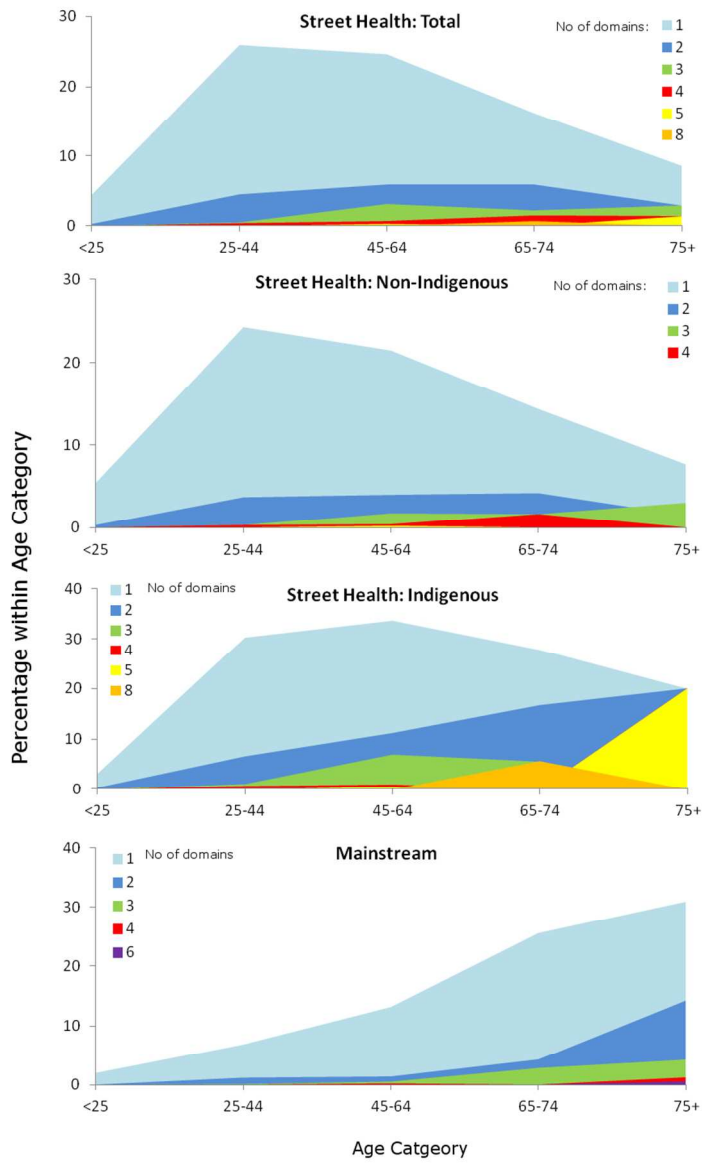

80x125mm (300 x 300 DPI)

## STROBE Statement—checklist of items that should be included in reports of observational studies

|                              | Item No | Recommendation                                                                                                                                                                                                                                                                                                                                                                                                                                                         | Page No (Line No)                         |
|------------------------------|---------|------------------------------------------------------------------------------------------------------------------------------------------------------------------------------------------------------------------------------------------------------------------------------------------------------------------------------------------------------------------------------------------------------------------------------------------------------------------------|-------------------------------------------|
| <b>Title and abstract</b>    | 1       | (a) Indicate the study's design with a commonly used term in the title or the abstract                                                                                                                                                                                                                                                                                                                                                                                 | Pg 1, 2                                   |
|                              |         | (b) Provide in the abstract an informative and balanced summary of what was done and what was found                                                                                                                                                                                                                                                                                                                                                                    | Pg 2                                      |
| <b>Introduction</b>          |         |                                                                                                                                                                                                                                                                                                                                                                                                                                                                        |                                           |
| Background/rationale         | 2       | Explain the scientific background and rationale for the investigation being reported                                                                                                                                                                                                                                                                                                                                                                                   | Pg 5                                      |
| Objectives                   | 3       | State specific objectives, including any prespecified hypotheses                                                                                                                                                                                                                                                                                                                                                                                                       | Pg 5 (50-55)                              |
| <b>Methods</b>               |         |                                                                                                                                                                                                                                                                                                                                                                                                                                                                        |                                           |
| Study design                 | 4       | Present key elements of study design early in the paper                                                                                                                                                                                                                                                                                                                                                                                                                | Pg 2 (9)                                  |
| Setting                      | 5       | Describe the setting, locations, and relevant dates, including periods of recruitment, exposure, follow-up, and data collection                                                                                                                                                                                                                                                                                                                                        | Pg 6 (7-15)                               |
| Participants                 | 6       | (a) <i>Cohort study</i> —Give the eligibility criteria, and the sources and methods of selection of participants. Describe methods of follow-up<br><i>Case-control study</i> —Give the eligibility criteria, and the sources and methods of case ascertainment and control selection. Give the rationale for the choice of cases and controls<br><i>Cross-sectional study</i> —Give the eligibility criteria, and the sources and methods of selection of participants | Pg 6 (7-15)                               |
|                              |         | (b) <i>Cohort study</i> —For matched studies, give matching criteria and number of exposed and unexposed<br><i>Case-control study</i> —For matched studies, give matching criteria and the number of controls per case                                                                                                                                                                                                                                                 |                                           |
| Variables                    | 7       | Clearly define all outcomes, exposures, predictors, potential confounders, and effect modifiers. Give diagnostic criteria, if applicable                                                                                                                                                                                                                                                                                                                               | Pg 6 (18-48)                              |
| Data sources/<br>measurement | 8*      | For each variable of interest, give sources of data and details of methods of assessment (measurement). Describe comparability of assessment methods if there is more than one group                                                                                                                                                                                                                                                                                   | Pg 7 (5-56)<br>Pg 8 (3-8)                 |
| Bias                         | 9       | Describe any efforts to address potential sources of bias                                                                                                                                                                                                                                                                                                                                                                                                              | -                                         |
| Study size                   | 10      | Explain how the study size was arrived at                                                                                                                                                                                                                                                                                                                                                                                                                              | Pg 6 (7-15)                               |
| Quantitative variables       | 11      | Explain how quantitative variables were handled in the analyses. If applicable, describe which groupings were chosen and why                                                                                                                                                                                                                                                                                                                                           |                                           |
| Statistical methods          | 12      | (a) Describe all statistical methods, including those used to control for confounding                                                                                                                                                                                                                                                                                                                                                                                  | Pg 6 (51-58)<br>Pg 7 (3-59)<br>Pg 8 (3-8) |
|                              |         | (b) Describe any methods used to examine subgroups and interactions                                                                                                                                                                                                                                                                                                                                                                                                    | Pg 7 (41-56)<br>Pg 8 (3-5)                |
|                              |         | (c) Explain how missing data were addressed                                                                                                                                                                                                                                                                                                                                                                                                                            | N/A                                       |
|                              |         | (d) <i>Cohort study</i> —If applicable, explain how loss to follow-up was addressed<br><i>Case-control study</i> —If applicable, explain how matching of cases and controls was addressed<br><i>Cross-sectional study</i> —If applicable, describe analytical methods taking                                                                                                                                                                                           | N/A                                       |

|                          |     |                                                                                                                                                                                                              |                                |
|--------------------------|-----|--------------------------------------------------------------------------------------------------------------------------------------------------------------------------------------------------------------|--------------------------------|
|                          |     | account of sampling strategy                                                                                                                                                                                 |                                |
|                          |     | (e) Describe any sensitivity analyses                                                                                                                                                                        | N/A                            |
| <b>Results</b>           |     |                                                                                                                                                                                                              | <b>Page No<br/>(Line No)</b>   |
| Participants             | 13* | (a) Report numbers of individuals at each stage of study—eg numbers potentially eligible, examined for eligibility, confirmed eligible, included in the study, completing follow-up, and analysed            | Pg 9 (6-7)                     |
|                          |     | (b) Give reasons for non-participation at each stage                                                                                                                                                         | N/A                            |
|                          |     | (c) Consider use of a flow diagram                                                                                                                                                                           | N/A                            |
| Descriptive data         | 14* | (a) Give characteristics of study participants (eg demographic, clinical, social) and information on exposures and potential confounders                                                                     | Pg 9 (7-54)                    |
|                          |     | (b) Indicate number of participants with missing data for each variable of interest                                                                                                                          | N/A                            |
|                          |     | (c) <i>Cohort study</i> —Summarise follow-up time (eg, average and total amount)                                                                                                                             | N/A                            |
| Outcome data             | 15* | <i>Cohort study</i> —Report numbers of outcome events or summary measures over time                                                                                                                          | Pg 10 (14)<br>to Pg 15<br>(23) |
|                          |     | <i>Case-control study</i> —Report numbers in each exposure category, or summary measures of exposure                                                                                                         |                                |
|                          |     | <i>Cross-sectional study</i> —Report numbers of outcome events or summary measures                                                                                                                           |                                |
| Main results             | 16  | (a) Give unadjusted estimates and, if applicable, confounder-adjusted estimates and their precision (eg, 95% confidence interval). Make clear which confounders were adjusted for and why they were included | Pgs 10-15                      |
|                          |     | (b) Report category boundaries when continuous variables were categorized                                                                                                                                    | Pg 7<br>(11-27)                |
|                          |     | (c) If relevant, consider translating estimates of relative risk into absolute risk for a meaningful time period                                                                                             | N/A                            |
| Other analyses           | 17  | Report other analyses done—eg analyses of subgroups and interactions, and sensitivity analyses                                                                                                               |                                |
| <b>Discussion</b>        |     |                                                                                                                                                                                                              |                                |
| Key results              | 18  | Summarise key results with reference to study objectives                                                                                                                                                     | Pg 15 (15-54)                  |
| Limitations              | 19  | Discuss limitations of the study, taking into account sources of potential bias or imprecision. Discuss both direction and magnitude of any potential bias                                                   | Pg 16 (3-20)                   |
| Interpretation           | 20  | Give a cautious overall interpretation of results considering objectives, limitations, multiplicity of analyses, results from similar studies, and other relevant evidence                                   | Pg 16<br>(24) to Pg<br>18 (8)  |
| Generalisability         | 21  | Discuss the generalisability (external validity) of the study results                                                                                                                                        | Pg 18<br>(3) to Pg 19<br>(11)  |
| <b>Other information</b> |     |                                                                                                                                                                                                              |                                |
| Funding                  | 22  | Give the source of funding and the role of the funders for the present study and, if applicable, for the original study on which the present article is based                                                | Pg 19<br>(16-27)               |

1  
2 \*Give information separately for cases and controls in case-control studies and, if applicable, for exposed and  
3 unexposed groups in cohort and cross-sectional studies.

4 **Note:** An Explanation and Elaboration article discusses each checklist item and gives methodological background and  
5 published examples of transparent reporting. The STROBE checklist is best used in conjunction with this article (freely  
6 available on the Web sites of PLoS Medicine at <http://www.plosmedicine.org/>, Annals of Internal Medicine at  
7 <http://www.annals.org/>, and Epidemiology at <http://www.epidem.com/>). Information on the STROBE Initiative is  
8 available at [www.strobe-statement.org](http://www.strobe-statement.org).  
9  
10  
11  
12  
13  
14  
15  
16  
17  
18  
19  
20  
21  
22  
23  
24  
25  
26  
27  
28  
29  
30  
31  
32  
33  
34  
35  
36  
37  
38  
39  
40  
41  
42  
43  
44  
45  
46  
47  
48  
49  
50  
51  
52  
53  
54  
55  
56  
57  
58  
59  
60

For peer review only
